# Supplementary material for: Structural isolation of NIR absorbing ferrocenyl bridged N-confused fused expanded phlorin, N-confused porphodimethene and the π-extended corrorin isomer: synthesis and characterization
Source: Royal Society of Chemistry journal article supplement (doi:10.1039/d1dt02385c), 2021-01-01
Supplement: d1dt02385c1.pdf [file d1dt02385c1.pdf]

*Electronic Supplementary Materials for*

**Structural isolation of NIR Absorbing Ferrocenyl Bridged N-Confused Fused expanded Phlorin, N-Confused Porphodimethene and  $\pi$ -extended Corrorin isomer: Synthesis and characterization**

Buddhadeb Chakraborty,<sup>a</sup> Sumit Sahoo,<sup>a</sup> Raja Naryanasamy,<sup>b</sup> Dandamudi Usharani<sup>\*b,c</sup> and Harapriya Rath <sup>\*a</sup>

<sup>a</sup> School of Chemical Sciences, Indian Association for The Cultivation of Science, 2A/2B Raja S. C. Mullick Road, Jadavpur, Kolkata 700 032, India, E-mail: [ichr@iacs.res.in](mailto:ichr@iacs.res.in)

<sup>b</sup> Department of Food Safety and Analytical Quality Control Laboratory, Central Food Technological Research Institute, Mysore, Karnataka 700020, India, E-mail: [ushad@cftri.res.in](mailto:ushad@cftri.res.in)

<sup>c</sup> Academy of Scientific and Innovative Research (AcSIR), CSIR-HRDG, Ghaziabad, Uttar Pradesh, India

**Table of Contents**

|                          |         |
|--------------------------|---------|
| Materials and Methods    | S2-S3   |
| Schemes                  | S4-S5   |
| Spectroscopic Data       | S6-S34  |
| Electrochemistry         | S35     |
| X-ray Crystal Data       | S36     |
| Theoretical Calculations | S37-S56 |
| X,Y,Z Coordinates        | S57-S65 |

## **Materials and Methods:**

**1.1** Electronic absorption spectra were measured with a Perkin Elmer Lambda 950 UV-visible-NIR spectrophotometer. <sup>1</sup>H NMR spectra were recorded on a Bruker AVIII 500 MHz spectrometer, Bruker AVIII 400 MHz, Bruker DPX-300 MHz spectrometer and chemical shifts were reported as the delta scale in ppm relative to CHCl<sub>3</sub> (δ = 7.26 ppm) and CH<sub>2</sub>Cl<sub>2</sub> (δ = 5.32 ppm) as internal reference for <sup>1</sup>H and <sup>13</sup>C NMR CHCl<sub>3</sub> (δ = 77.00 ppm) and CH<sub>2</sub>Cl<sub>2</sub> (δ = 55.00 ppm). ESI HR-MS data were recorded using Waters QTOF Micro YA263 spectrometer. All solvents and chemicals were of reagent grade quality, obtained commercially and used without further purification except as noted. For spectral measurements, anhydrous dichloromethane was obtained by refluxing and distillation over CaH<sub>2</sub>. Dry THF was obtained by refluxing and distillation over pressed Sodium metal. Thin layer chromatography (TLC) was carried out on alumina sheets coated with silica gel 60 F<sub>254</sub> (Merck 5554) and gravity column chromatography were performed using Merck Silica Gel 230-400 mesh. Aluminum Oxide (Basic) grade II was purchased from Sigma Aldrich.

### **1.2 Theoretical Calculation**

Macrocycle structures of **5** were modelled based on the observed <sup>1</sup>H NMR spectra and several isomers of **7** (**7a-7g**) were built based on the mechanistic possibility for the formation of **7**. Along with the modelled structures (**5** and **7a-7g**), X-ray crystal structure coordinates of **6**, were optimized using unrestricted hybrid density functional B3LYP<sup>1a-c</sup> and LanL2DZ<sup>2a-c</sup> (for metal atom) and 6-31G\*\* basis set for rest of the atoms.<sup>3</sup> Hessian calculations were performed at same level of theory to ascertain the optimised structures are local minima. As deprotonation is the prevailing mechanism in anionic binding, the deprotonated state of **6** (**[6]<sup>-1</sup>**) was also optimised at same level of theory and identified as a stationary point. Time dependent density functional (TD-DFT)<sup>4</sup> calculations were performed for **5**, **6**, **deprotonated 6** and isomers of **7a-7g** in the presence of dichloromethane solvent with implicit polarizable continuum model (PCM) and the integral equation formalism variant (IEFPCM)<sup>5</sup> at same level of theory using Gaussian 16 A. 03.<sup>6</sup> The electronic structure and electronic excitation analysis of these macrocycles were analyzed through kohn sham molecular orbitals and natural transition orbitals which were obtained from Multiwfn program<sup>7a</sup> and Gauss Sum.<sup>7b</sup> The nature of aromaticity of **7** were assessed from the nuclear chemical independent shift <sup>8a</sup> NICS (0) value and Anisotropy of the current-induced density (ACID)<sup>8b</sup> that employs gauge independent atomic orbital (GIAO) method<sup>8c-d</sup> and the continuous set of gauge transformations (CSGT)<sup>8e</sup> methods respectively. AICD plot was plotted using POV-Ray 3.7 for Windows. In addition, NICS<sub>zz</sub> (0) value was obtained from Multiwfn program.<sup>7a</sup>

### **References:**

1. (a) A. D. Becke, *J. Chem. Phys.*, 1993, **98**, 1372-1377; (b) A. D. Becke, *J. Chem. Phys.*, 1992, **96**, 2155-2160; (c) C. Lee, W. Yang and R. G. Parr, *Physical review B*, 1988, **37**, 785-789.
2. (a) P. J. Hay and W. R. Wadt, *J. Chem. Phys.*, 1985, **82**, 270-283; (b) W. R. Wadt and P. J. Hay, *J. Chem. Phys.*, 1985, **82**, 284-298; (c) T. H. Dunning and P. J. Hay, In *Methods of electronic structure theory*, Springer: 1977; pp 1-27.
3. G. A. Petersson, A. Bennett, T. G. Al-Laham Tensfeldt, M. A. Shirley, W. A. and J. Mantzaris, *J. Chem. Phys.*, 1988, **89**, 2193-2218.

4. a) C. Adamo and D. Jacquemin, *Chem. Soc. Rev.*, 2013, **42**, 845-856; (b) G. Scalmani, M. J. Frisch, B. Mennucci, J. Tomasi, R. Cammi and V. A. Barone, *J. Chem. Phys.*, 2006, **124**, 1-15.
5. (a) S. Miertus, J. Tomasi, *Chem. Phys.*, 1982, **65**, 239-245; (b) M. Cossi and V. Barone, *Chem. Phys.*, 2000, **112**, 2427-2435.
6. M. J. Frisch, G. W. Trucks, H. B. Schlegel, G. E. Scuseria, M. A. Robb, J. R. Cheeseman, G. Scalmani, V. Barone, G. A. Petersson, H. Nakatsuji, X. Li, M. Caricato, A. V. Marenich, J. Bloino, B. G. Janesko, R. Gomperts, B. Mennucci, H. P. Hratchian, J. V. Ortiz, A. F. Izmaylov, J. L. Sonnenberg, Williams, F. Ding, F. Lipparini, F. Egidi, J. Goings, B. Peng, A. Petrone, T. Henderson, D. Ranasinghe, V. G. Zakrzewski, J. Gao, N. Rega, G. Zheng, W. Liang, M. Hada, M. Ehara, K. Toyota, R. Fukuda, J. Hasegawa, M. Ishida, T. Nakajima, Y. Honda, O. Kitao, H. Nakai, T. Vreven, K. Throssell, Jr. J. A. Montgomery, J. E. Peralta, F. Ogliaro, M. J. Bearpark, J. J. Heyd, E. N. Brothers, K. N. Kudin, V. N. Staroverov, T. A. Keith, R. Kobayashi, J. Normand, K. Raghavachari, A. P. Rendell, J. C. Burant, S. S. Iyengar, J. Tomasi, M. Cossi, J. M. Millam, M. Klene, C. Adamo, R. Cammi, J. W. Ochterski, R. L. Martin, K. Morokuma, O. Farkas, J. B. Foresman and D. J. Fox, *Gaussian 16 Rev. C.01*, Wallingford, CT, 2016.
7. (a) L. Tian and C. Feiwu, *J. Comput. Chem.*, 2012, **33**, 580-592; (b) N. M. O'Boyle, A. L. Tenderholt and K. M. Langner, *J. Comp. Chem.*, 2008, **29**, 839-845.
8. (a) P. v. R. Schleyer, C. Maerker, A. Dransfeld, H. Jiao and N. J.R. van Eikema Hommes, *J. Am. Chem. Soc.*, 1996, **118**, 6317-6318; (b) D. Geuenich, K. Hess, F. Köhler and R. Herges, *Chem. Rev.*, 2005, **105**, 3758-3772; (c) K. Wolinski, J. F. Hinton and P. Pulay, *J. Am. Chem. Soc.*, 1990, **112**, 8251-8260; (d) J. R. Cheeseman, G. W. Trucks, T. A. Keith and M. J. Frisch, *J. Chem. Phys.*, 1996, **104**, 5497-5509; (e) T. A. Keith and R. F.W Bader, *Chem. Phys. Lett.*, 1993, **210**, 223-231.

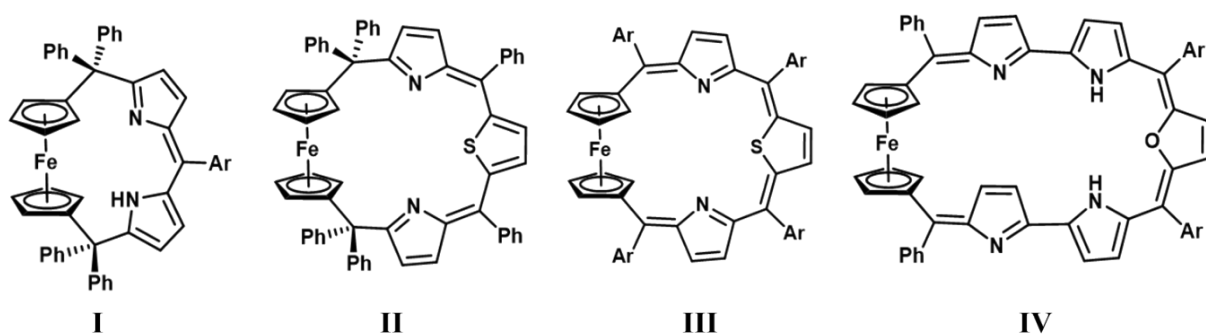

**Scheme S1.** Literature known Ferrocene bridged macrocycles

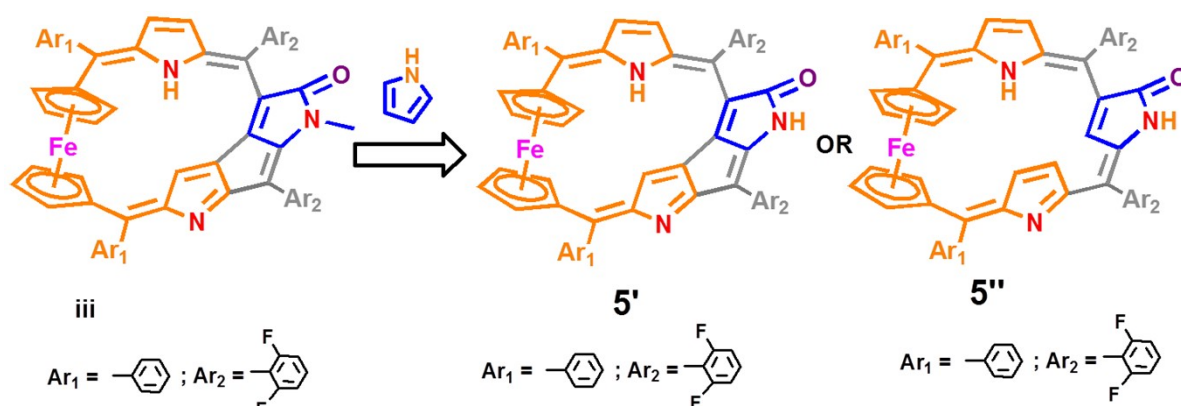

**Scheme S2.** Swapping N-Methyl N-Confused pyrrole with N-Confused pyrrole leading to the expected product of condensation between **2** and **4**

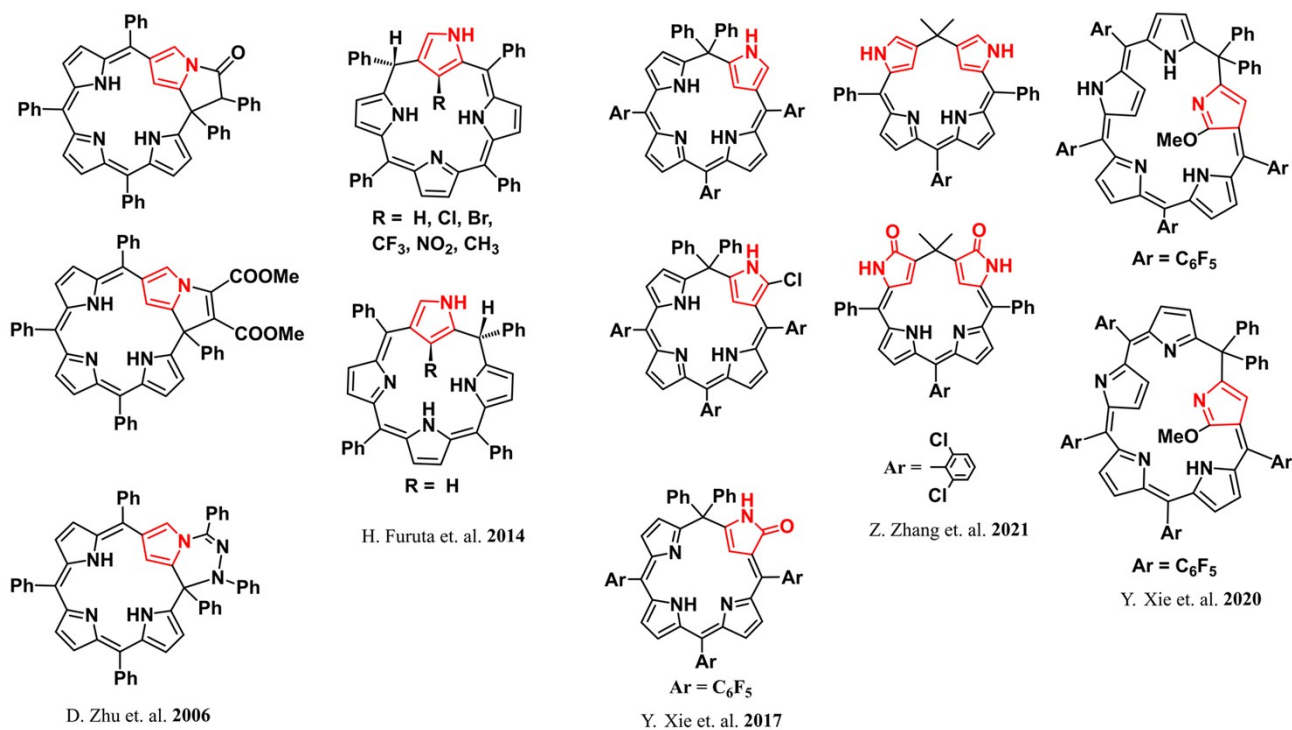

**Scheme S3.** Literature known N-Confused Phlorins and Expanded N-Confused Phlorins



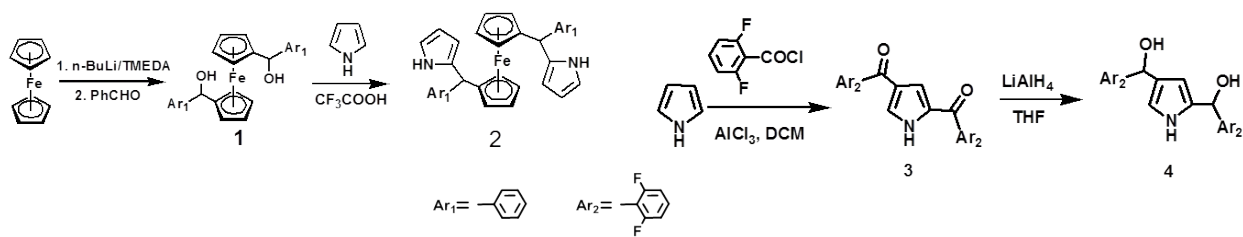

**Scheme S4.** Syntheses of precursors for macrocycles **5**, **6** and **7**

**Supplementary Data:**

## 2.1 Mass Spectra

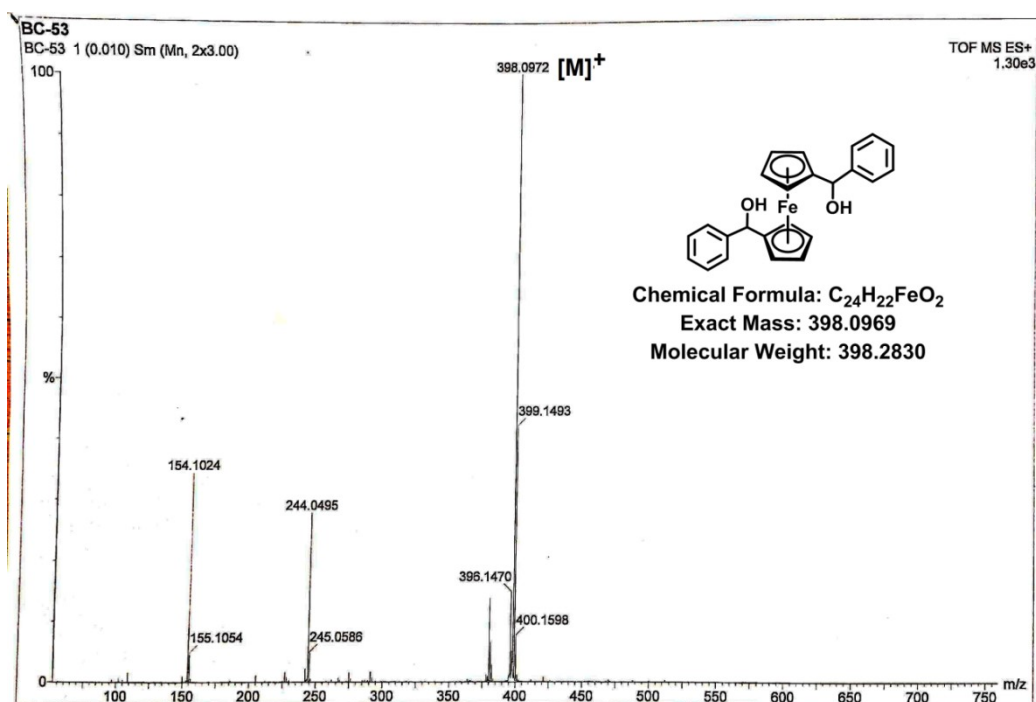

Fig. S1 HRMS Spectra of 1

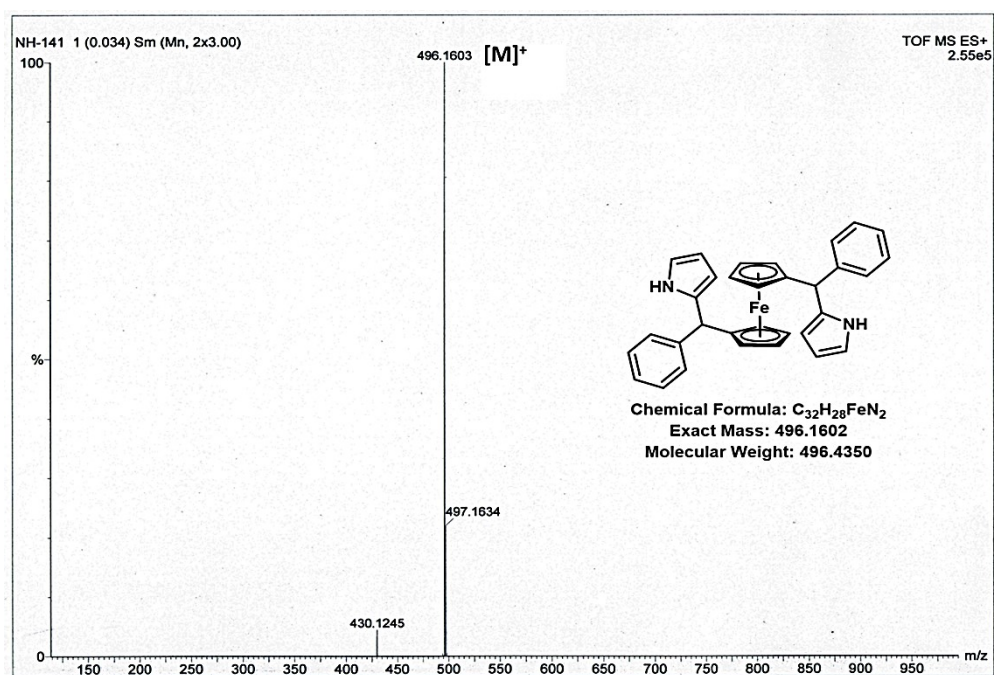

Fig. S2 HRMS Spectra of 2

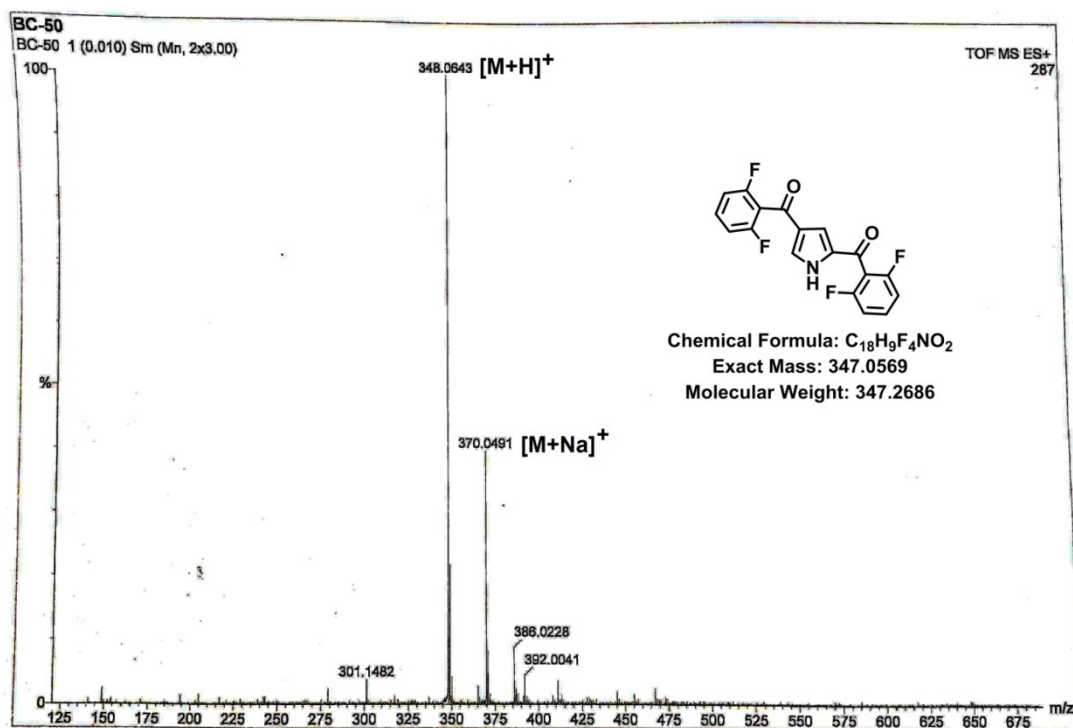

Fig. S3 HRMS Spectra of **3**

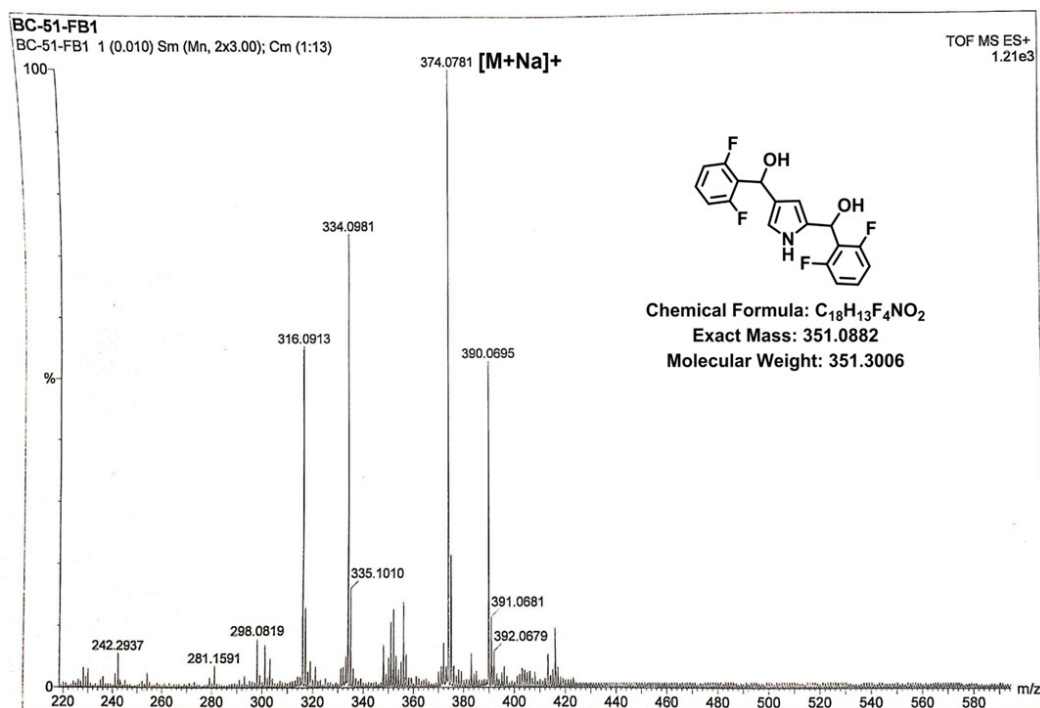

Fig. S4 HRMS Spectra of **4**

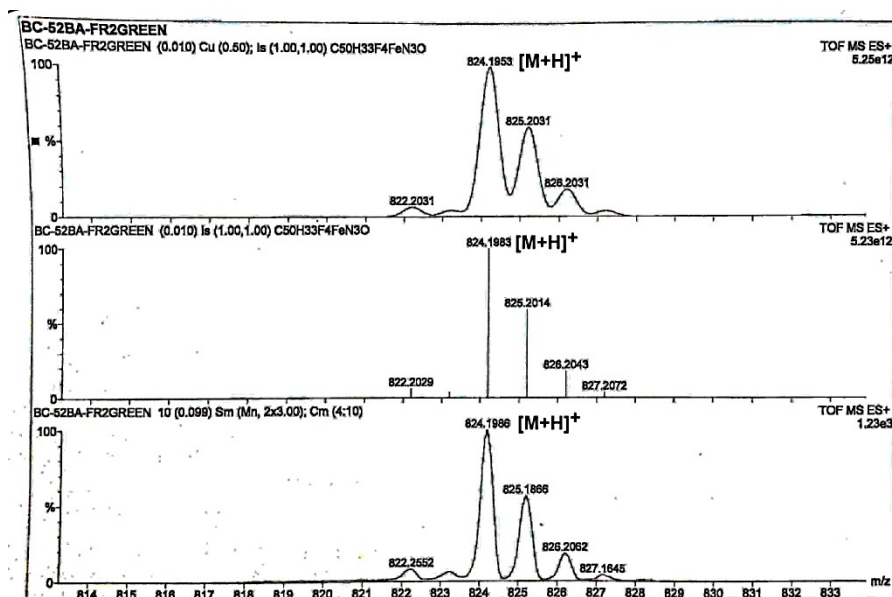

Fig. S5 HRMS Spectra of 5

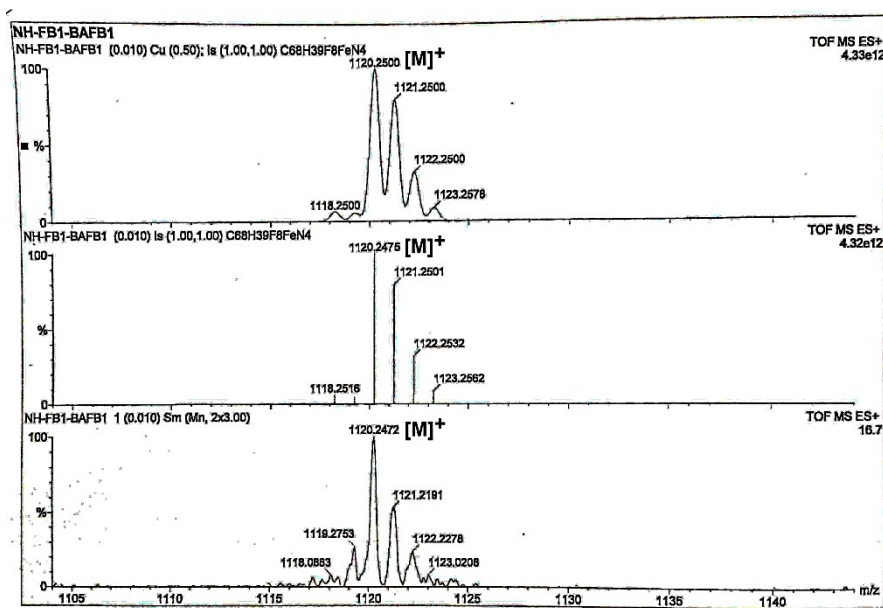

Fig. S6 HRMS Spectra of 6

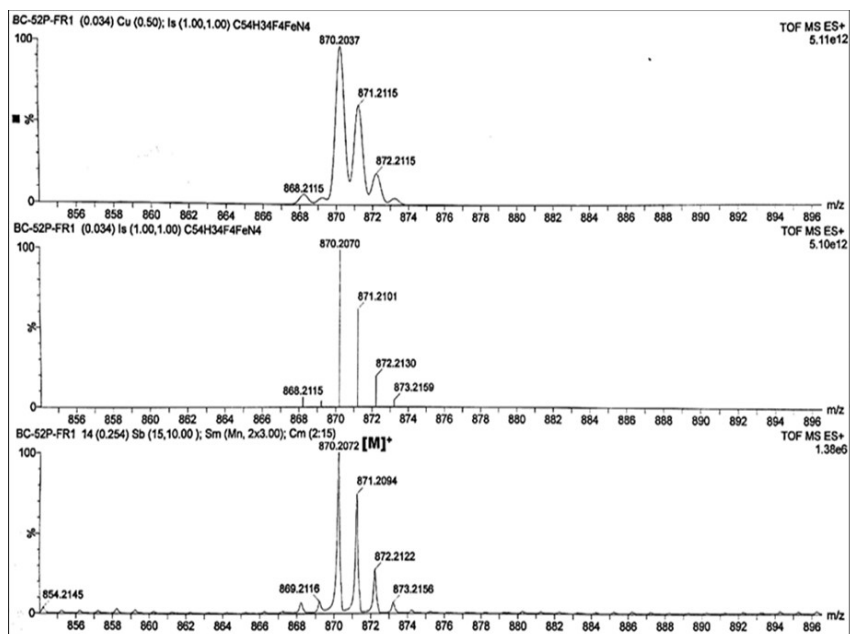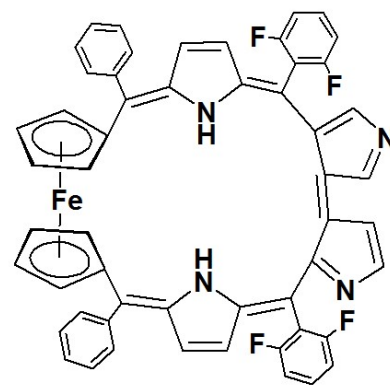

Chemical Formula: C<sub>54</sub>H<sub>34</sub>F<sub>4</sub>FeN<sub>4</sub>  
 Exact Mass: 870.2070  
 Molecular Weight: 870.7326

Fig. S7 HRMS Spectra of 7

## 2.2 UV-vis Spectra

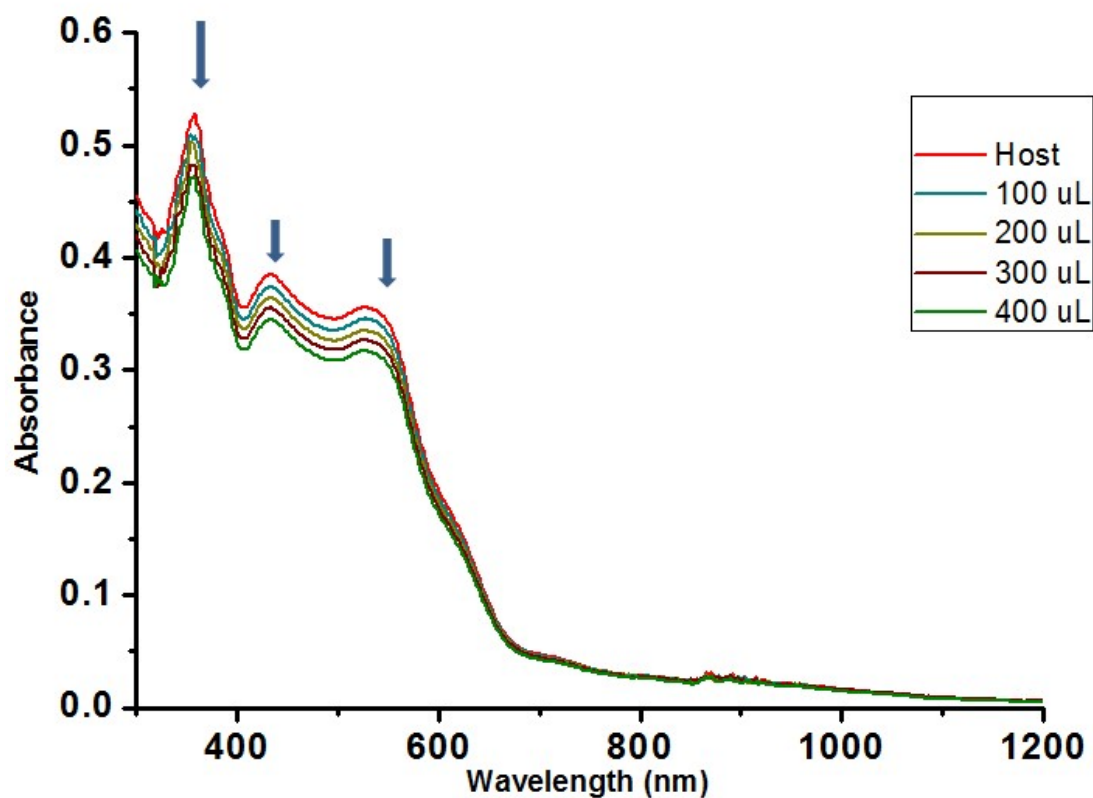

Fig. S8 Absorption spectra of **6** ( $2 \times 10^{-5}$  M) upon addition of  $\text{TBAClO}_4$  (0.7 M) in  $\text{CHCl}_3$

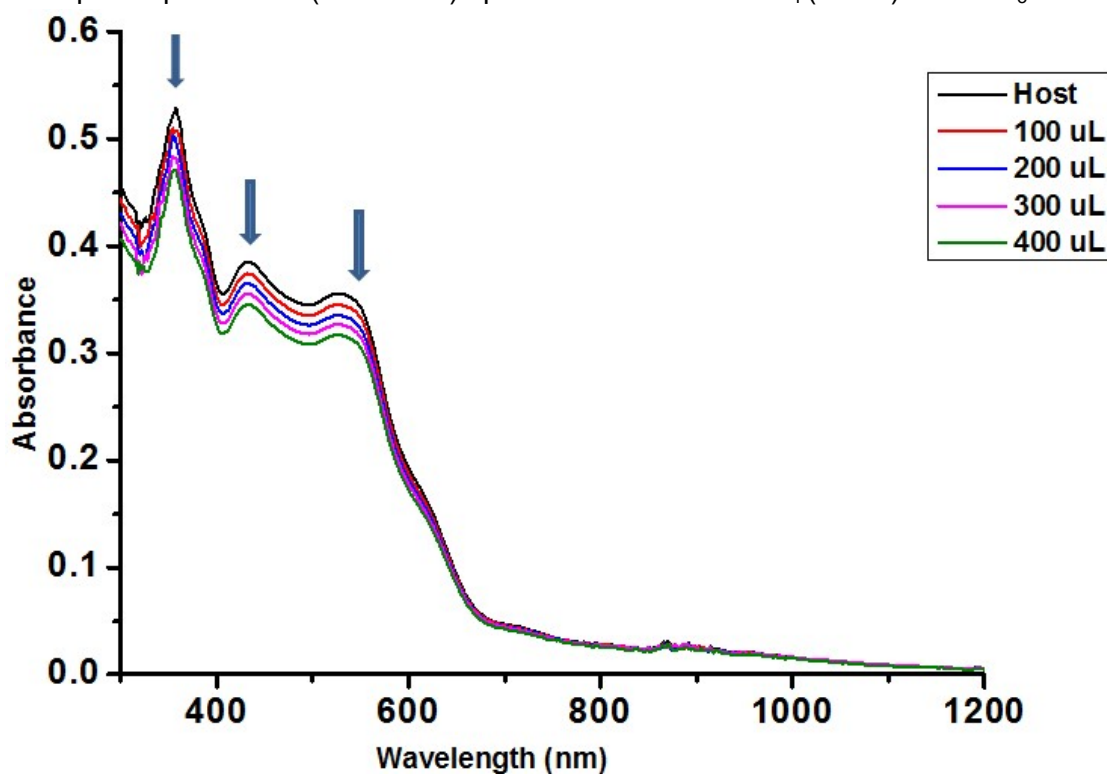

Fig. S9 Absorption spectra of **6** ( $2 \times 10^{-5}$  M) upon addition of  $\text{TBAPF}_6$  (0.7 M) in  $\text{CHCl}_3$

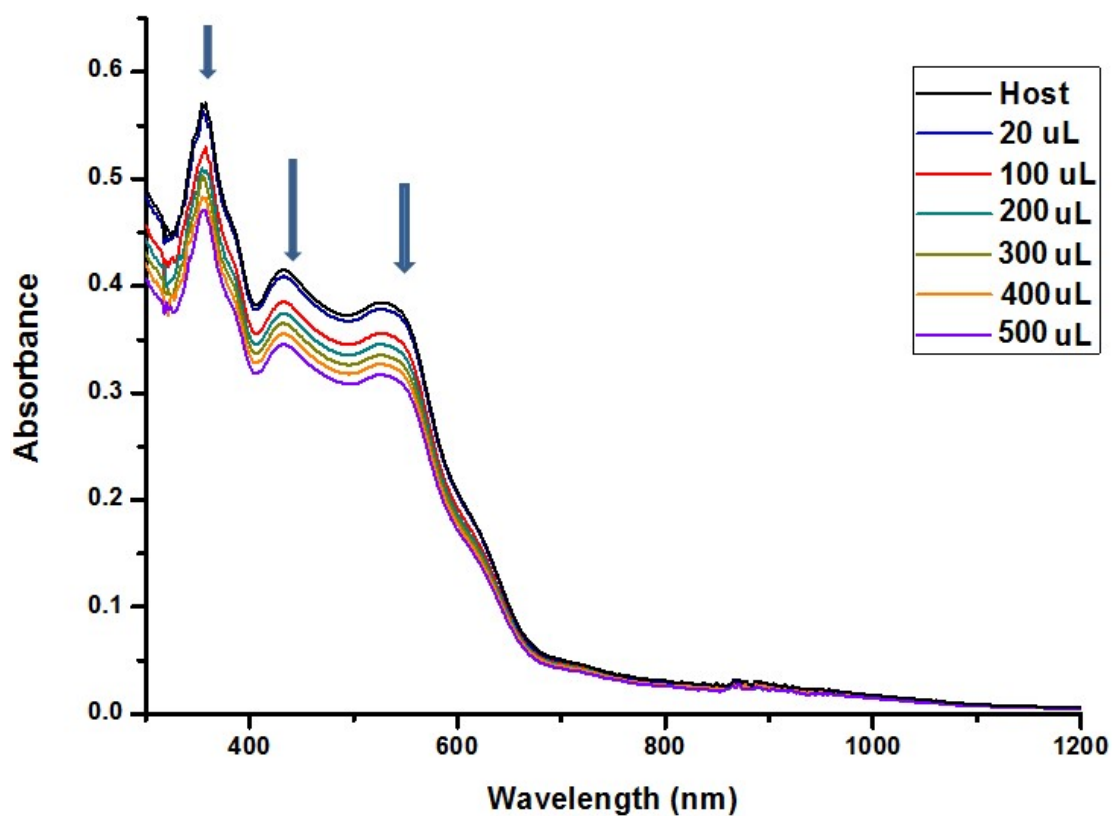

Fig. S10 Absorption spectra of **6** ( $2 \times 10^{-5}$  M) upon addition of TBACl (0.7 M) in  $\text{CHCl}_3$

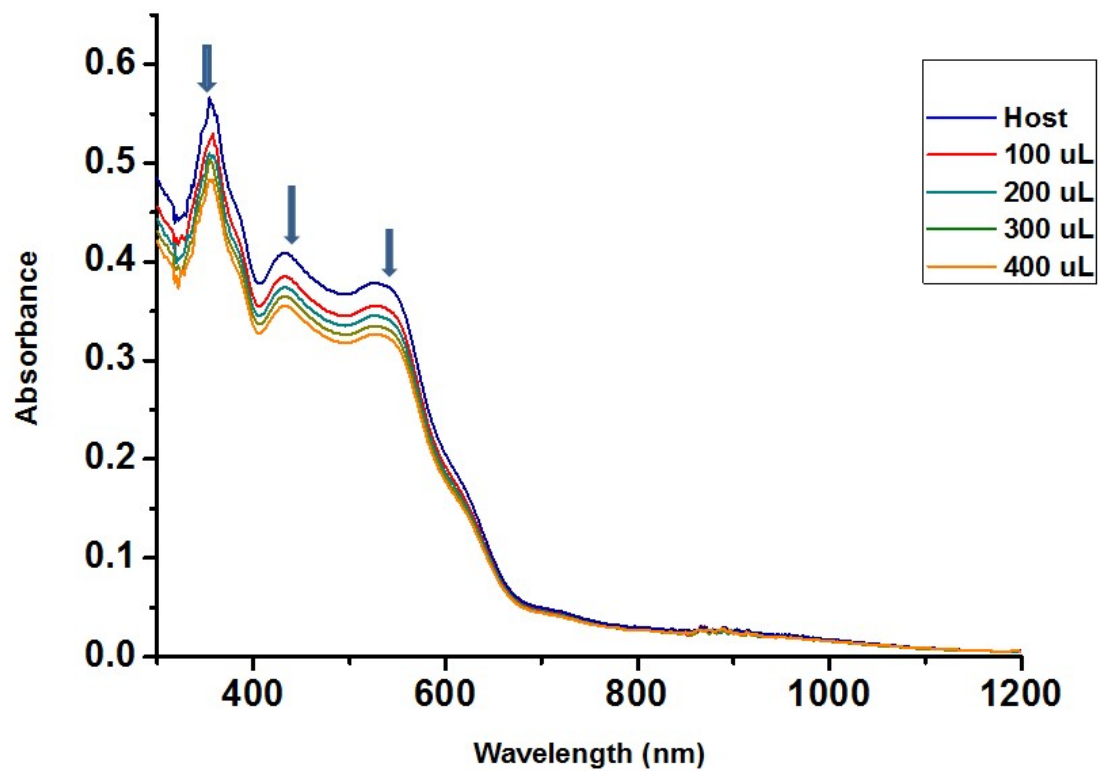

Fig. S11 Absorption spectra of **6** ( $2 \times 10^{-5}$  M) upon addition of TBABr (0.7 M) in  $\text{CHCl}_3$



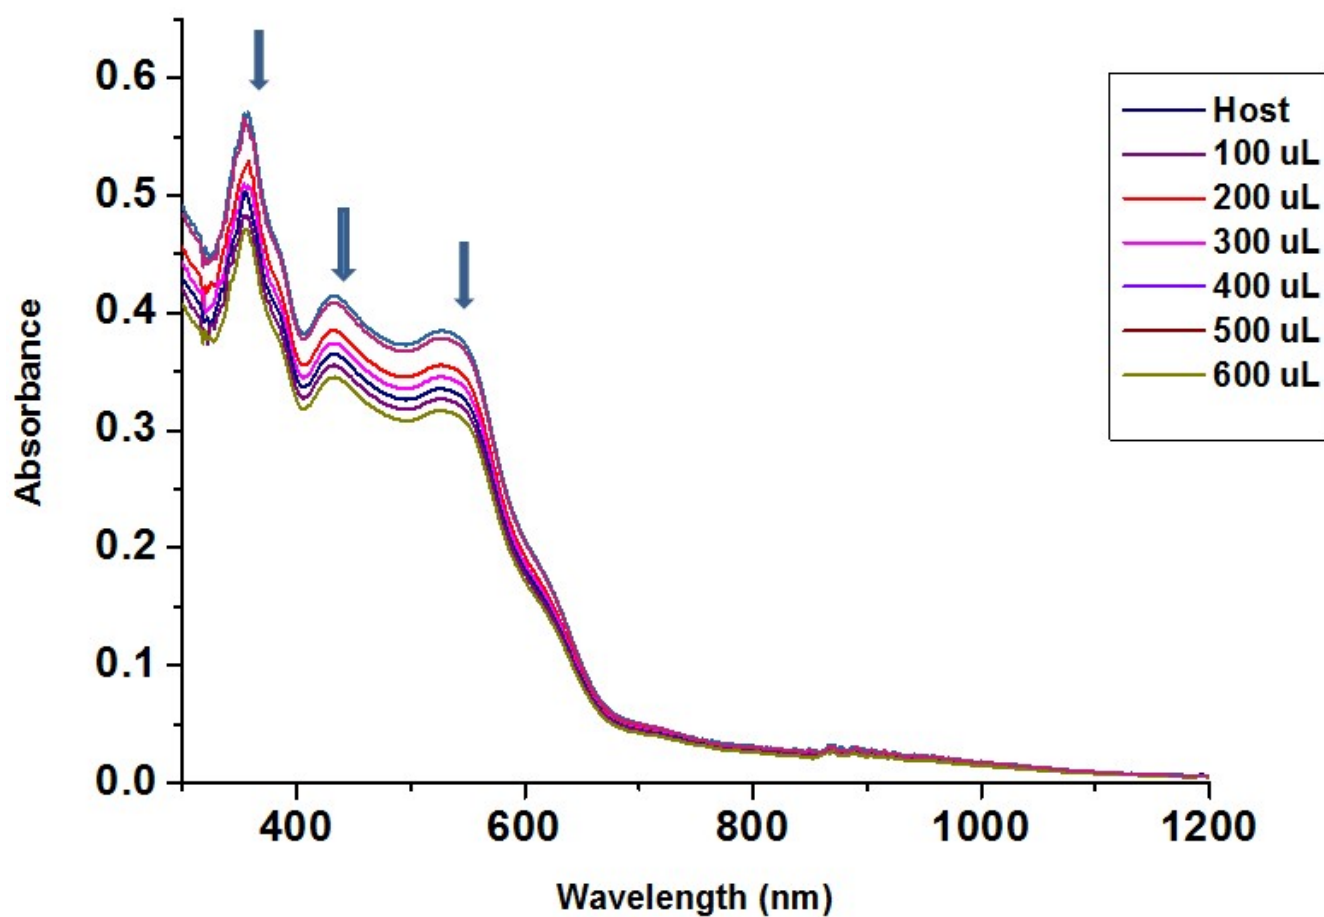

Fig. S12 Absorption spectra of **6** ( $2 \times 10^{-5}$  M) upon addition of TBAI (0.7 M) in  $\text{CHCl}_3$

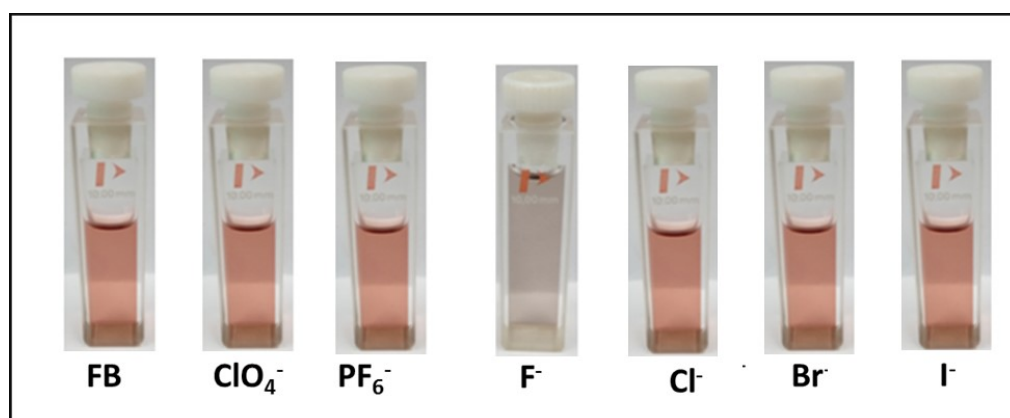

Fig. S13 Color Change induced upon addition of anions (excess equiv as the  $\text{Bu}_4\text{N}^+$  salt) to receptor **6** in  $\text{CHCl}_3$  at 298 K



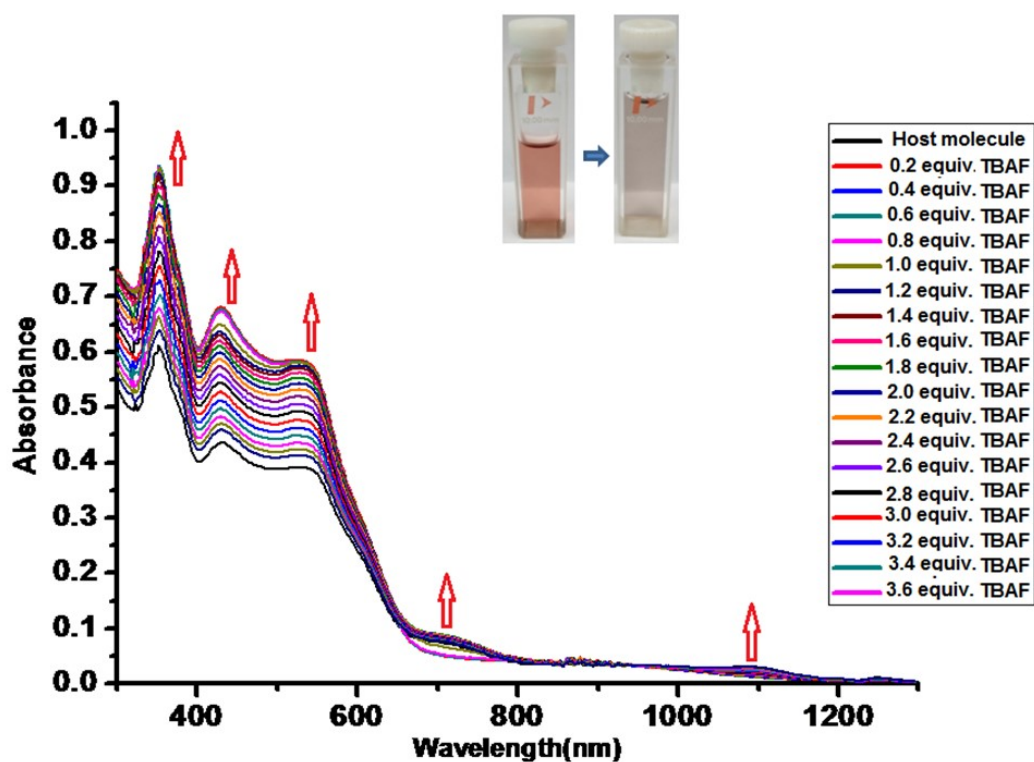

Fig. S14 Absorption spectra of **6** ( $2.6 \times 10^{-5}$  M) upon addition of TBAF (0.007 M) in  $\text{CHCl}_3$

### 2.3 IR spectra:

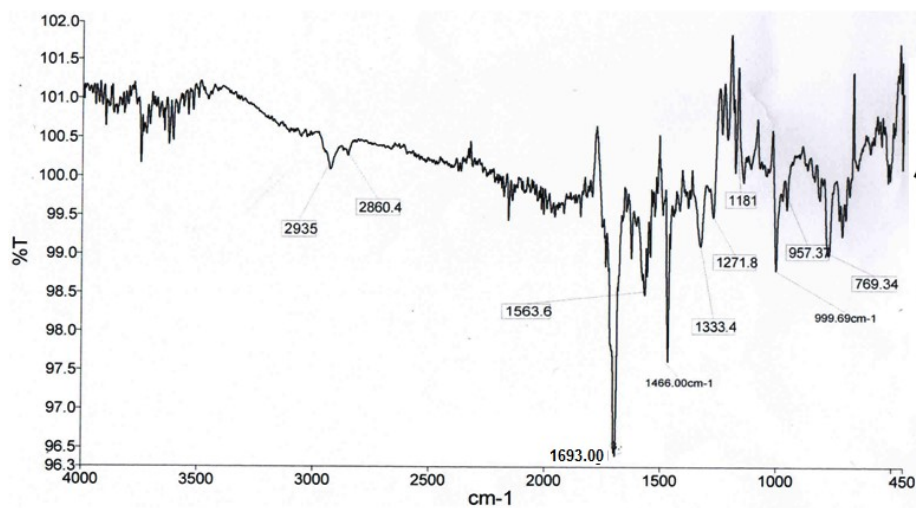

Fig. S15 IR Spectrum of **5**

## 2.4 NMR spectra:

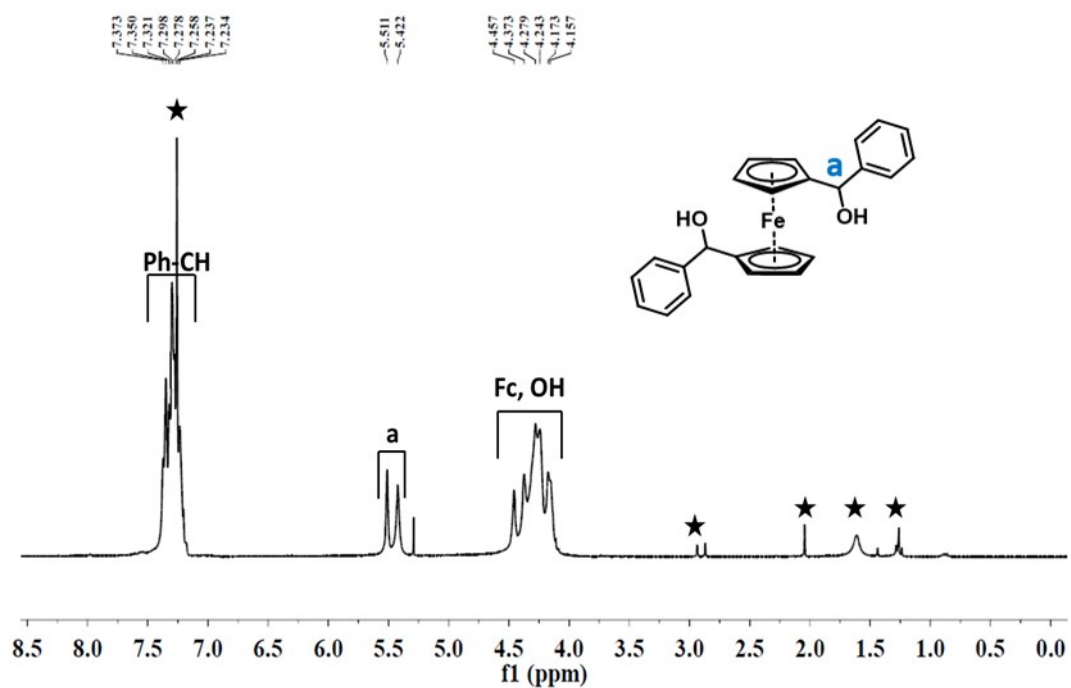

Fig. S16  $^1\text{H}$  NMR spectra of **1** in  $\text{CDCl}_3$  at 298 K

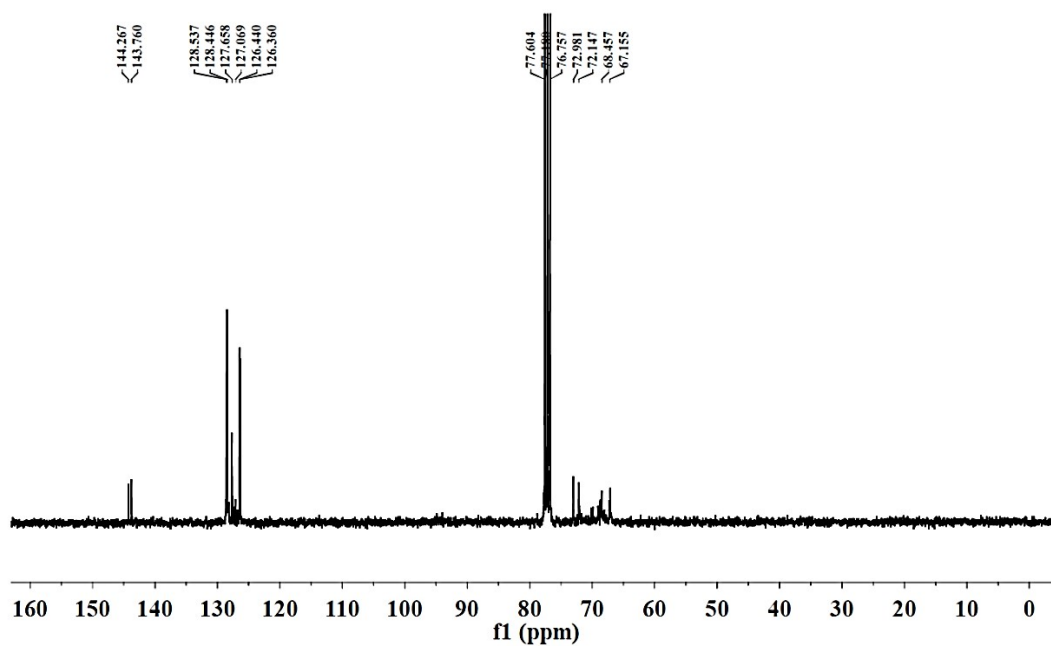

Fig. S17  $^{13}\text{C}$  NMR spectra of **1** in  $\text{CDCl}_3$  at 298 K

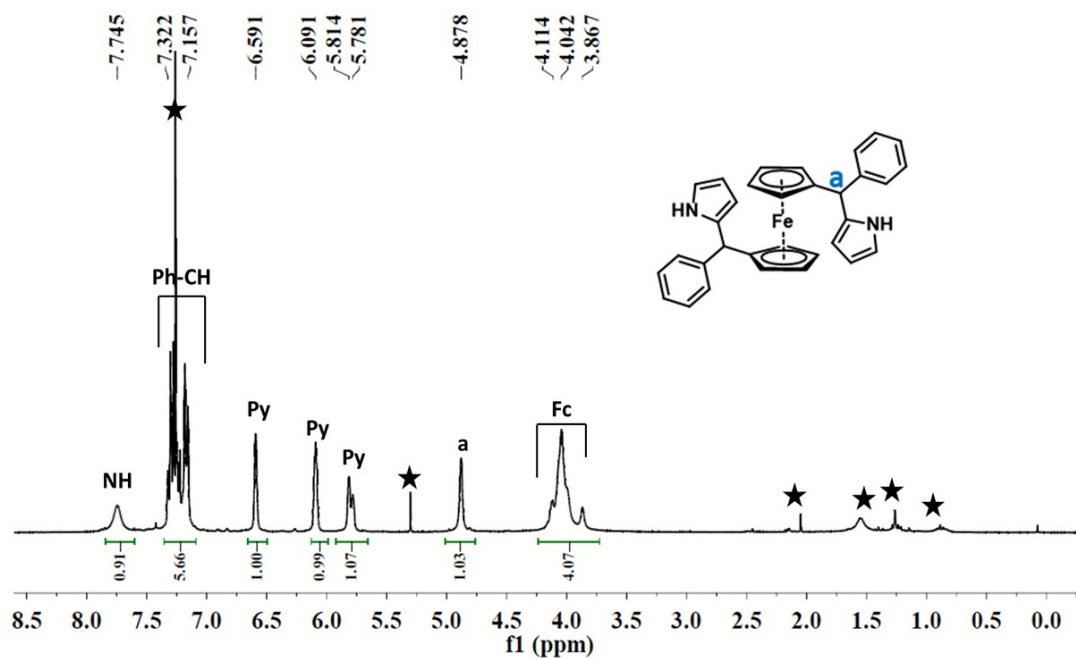

Fig. S18 <sup>1</sup>H NMR spectra of **2** in CDCl<sub>3</sub> at 298 K

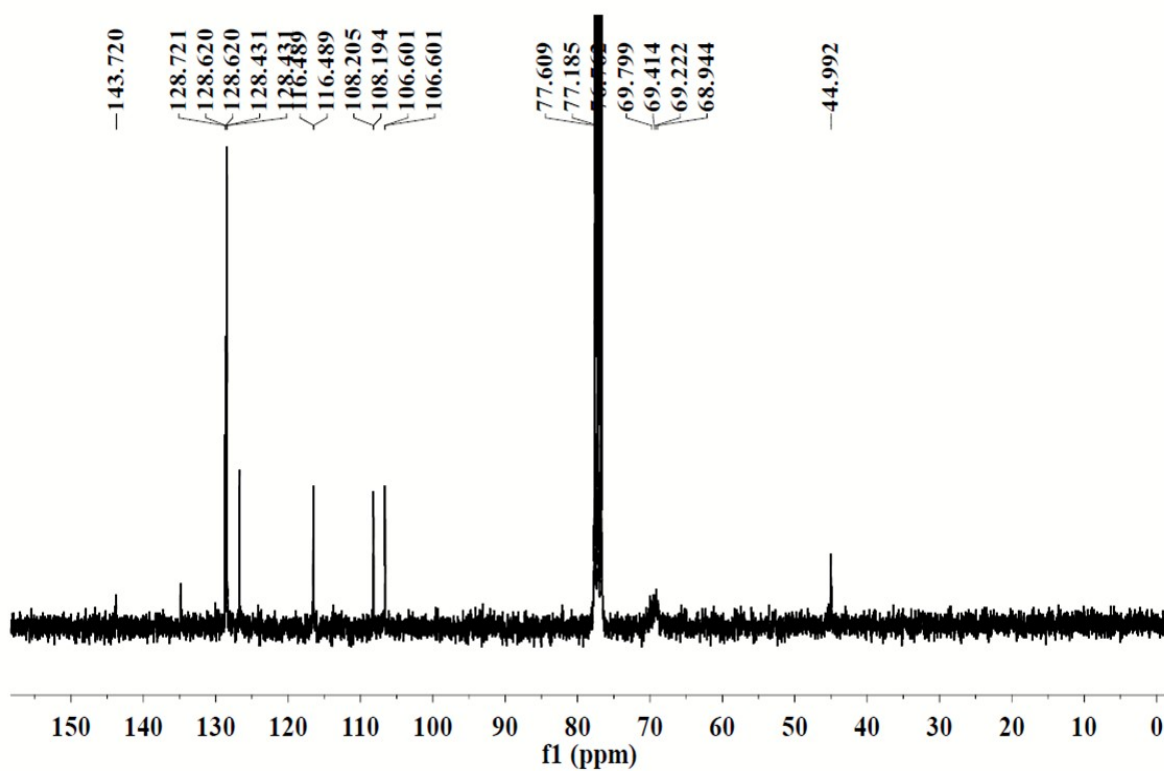

Fig. S19 <sup>13</sup>C NMR spectra of **2** in CDCl<sub>3</sub> at 298 K

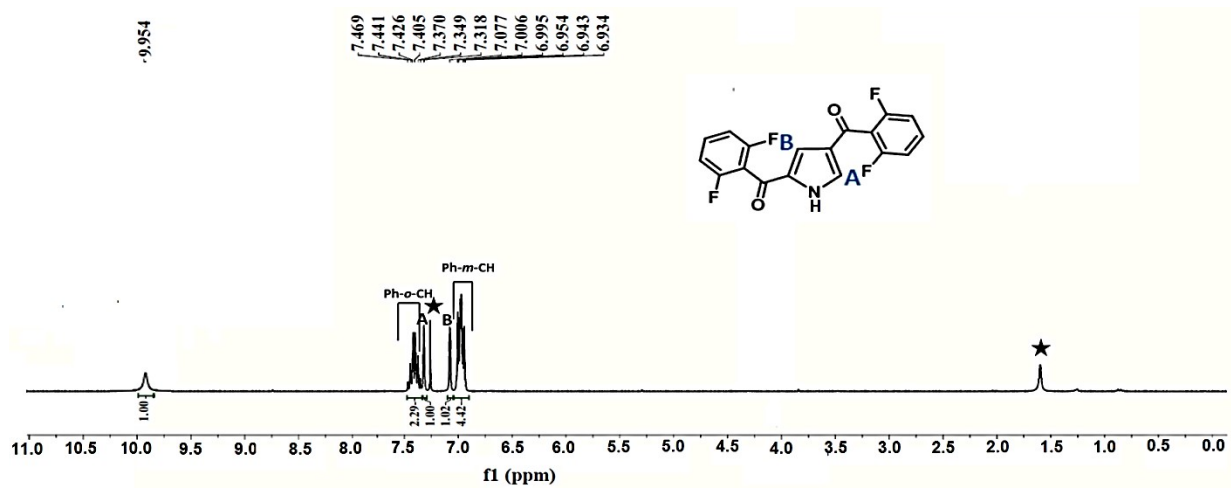

Fig. S20 <sup>1</sup>H NMR spectra of **3** in CDCl<sub>3</sub> at 298 K

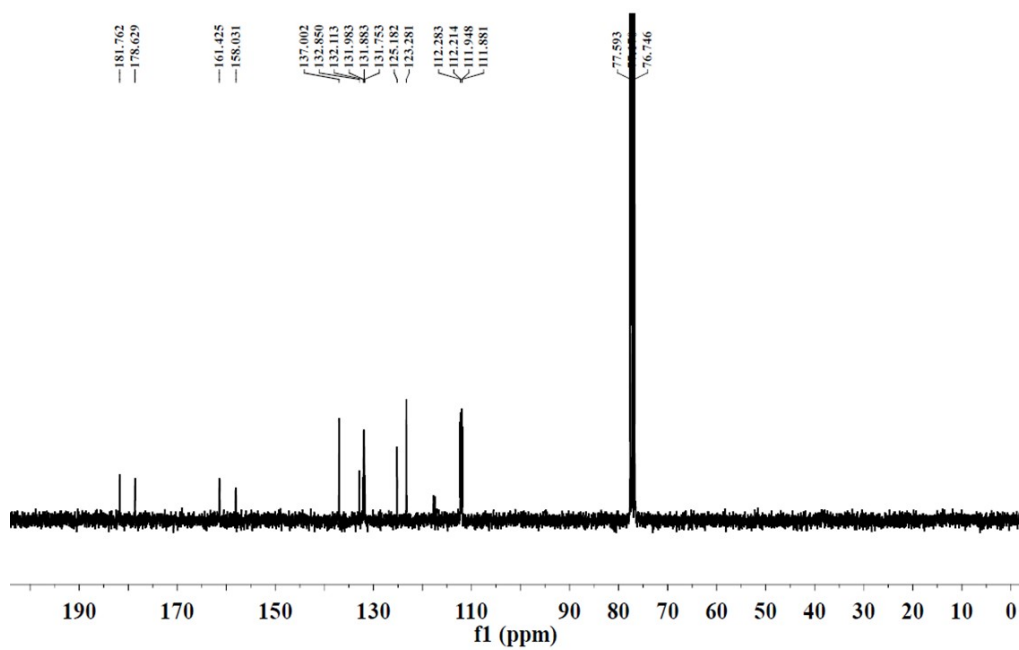

Fig. S21 <sup>13</sup>C NMR spectra of **3** in CDCl<sub>3</sub> at 298 K

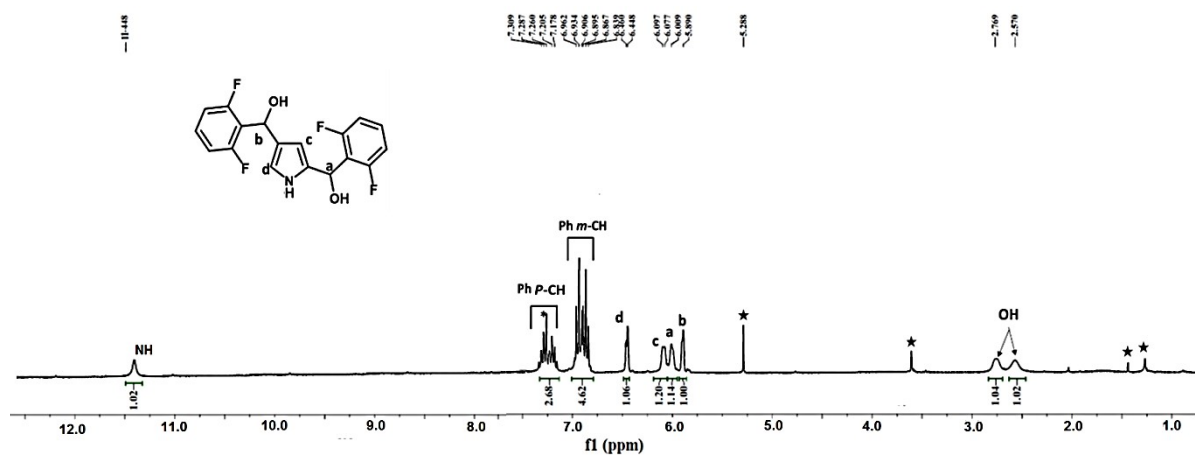

Fig. S22 <sup>1</sup>H NMR spectra of **4** in CDCl<sub>3</sub> at 298 K

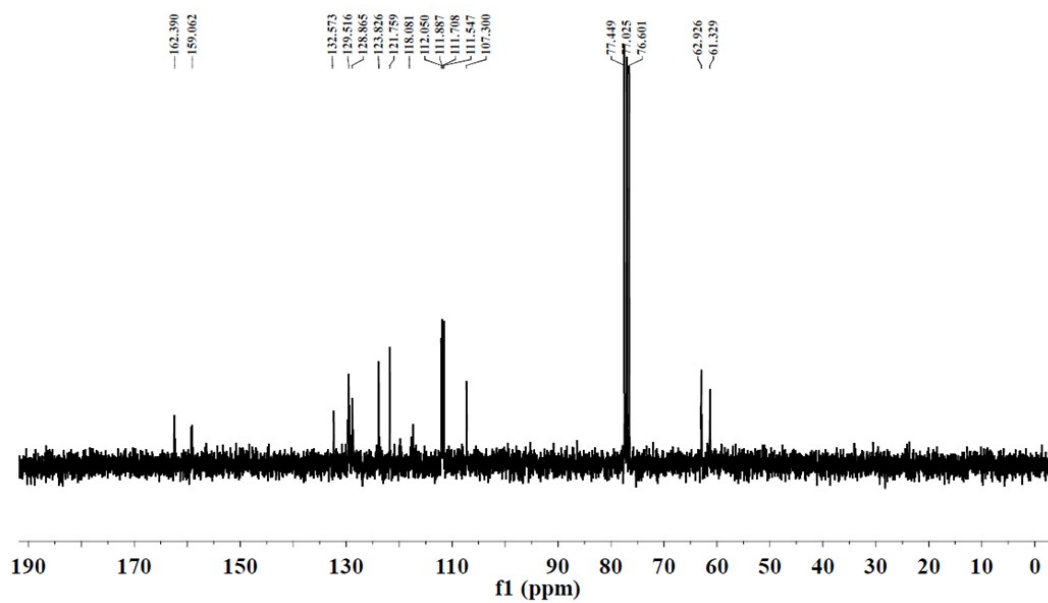

Fig. S23 <sup>13</sup>C NMR spectra of **4** in CDCl<sub>3</sub> at 298 K

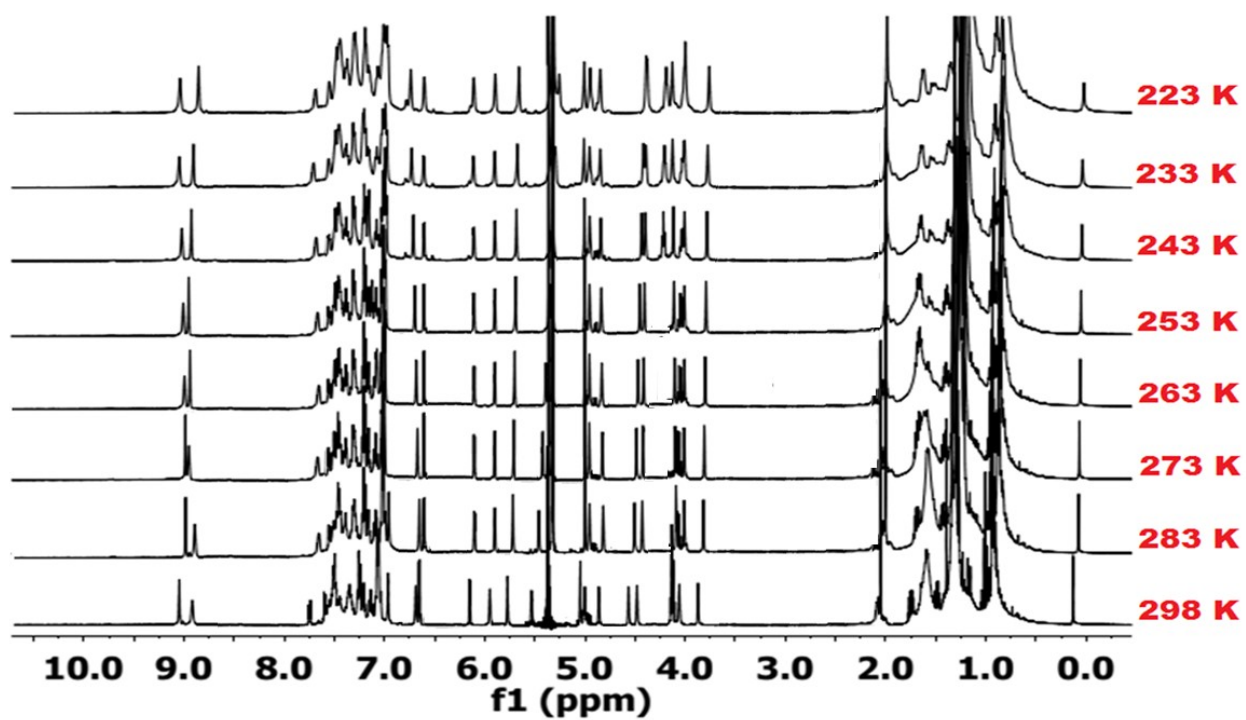

Fig. S24 Low VT <sup>1</sup>H NMR spectra of **5** in CD<sub>2</sub>Cl<sub>2</sub>

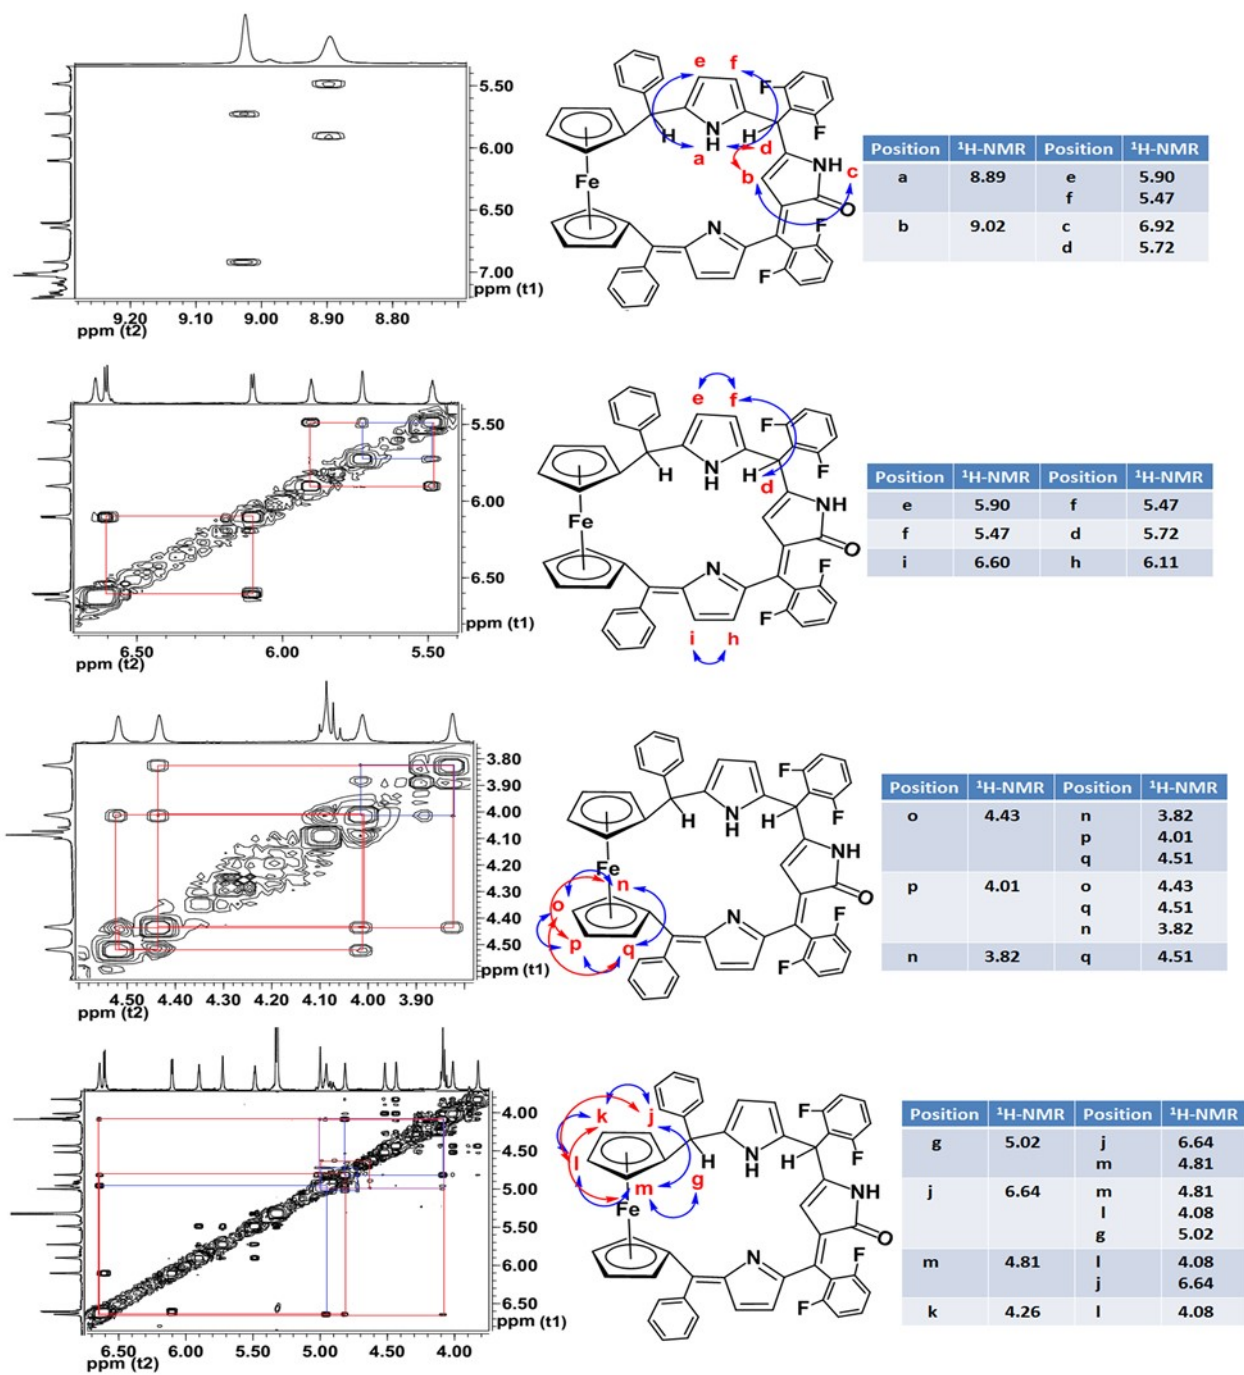

Fig. S25 <sup>1</sup>H -<sup>1</sup>H 2D COSY NMR spectra of **5** in CD<sub>2</sub>Cl<sub>2</sub> at 298 K



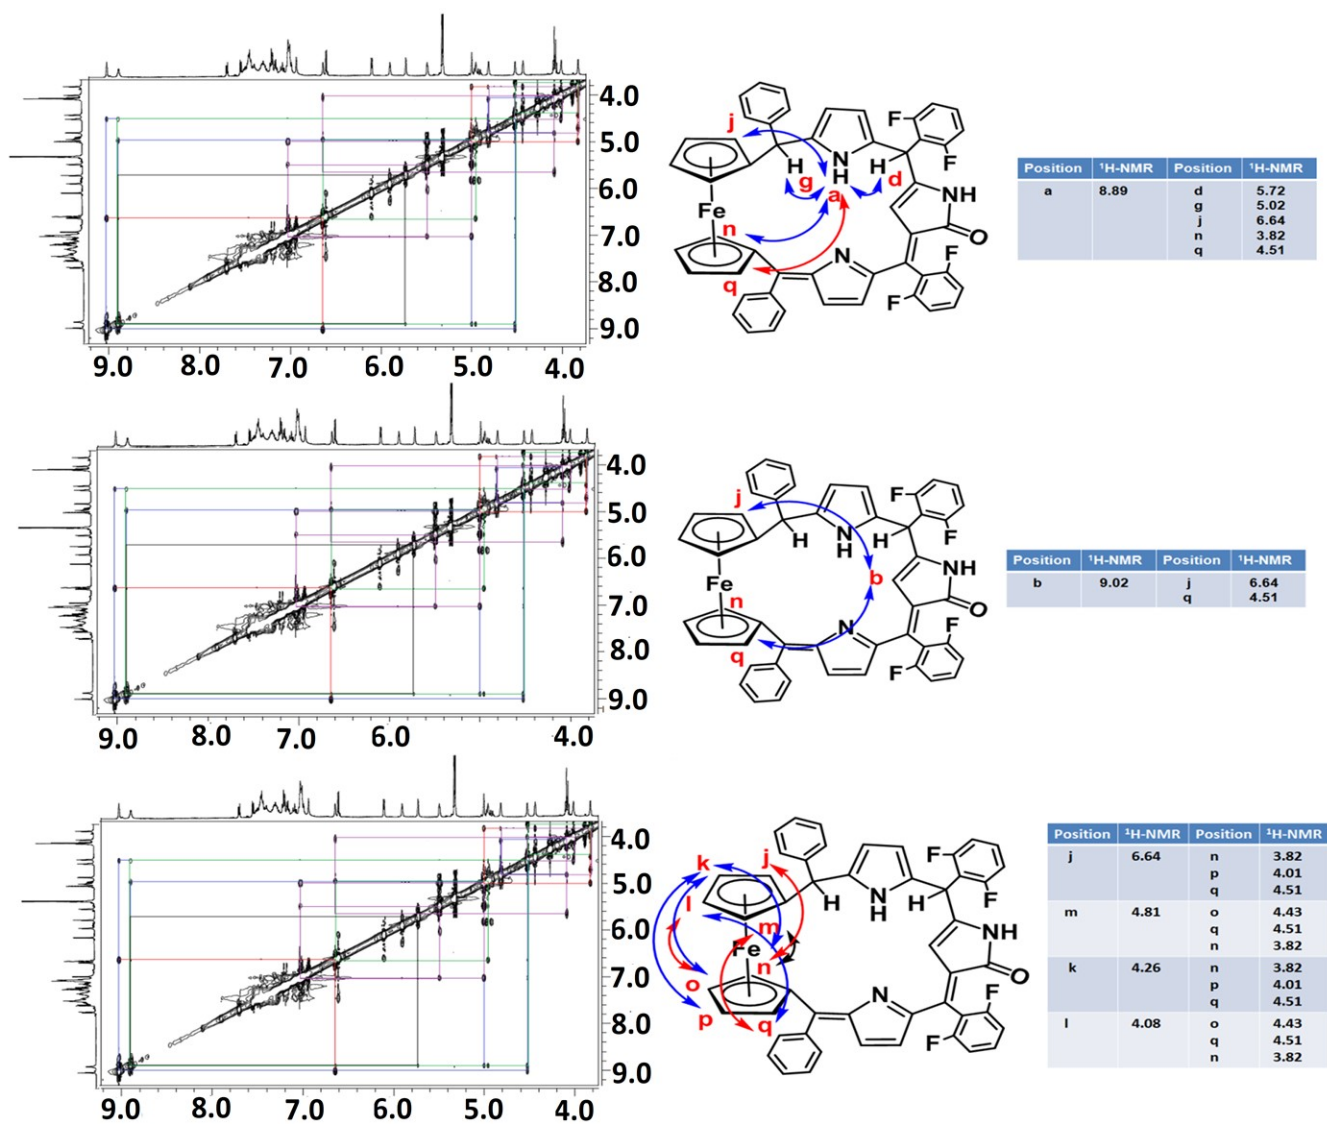

Fig. S26  $^1\text{H}$  - $^1\text{H}$  2D ROESY NMR spectra of **5** in  $\text{CD}_2\text{Cl}_2$  at 298 K

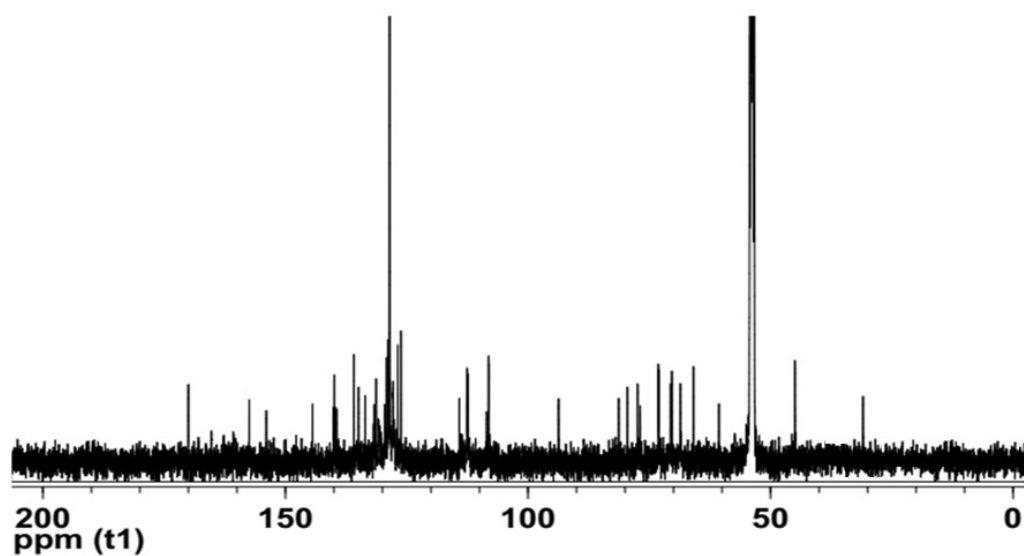

Fig. S27  $^{13}\text{C}$  NMR spectra of **5** in  $\text{CD}_2\text{Cl}_2$  at 298 K



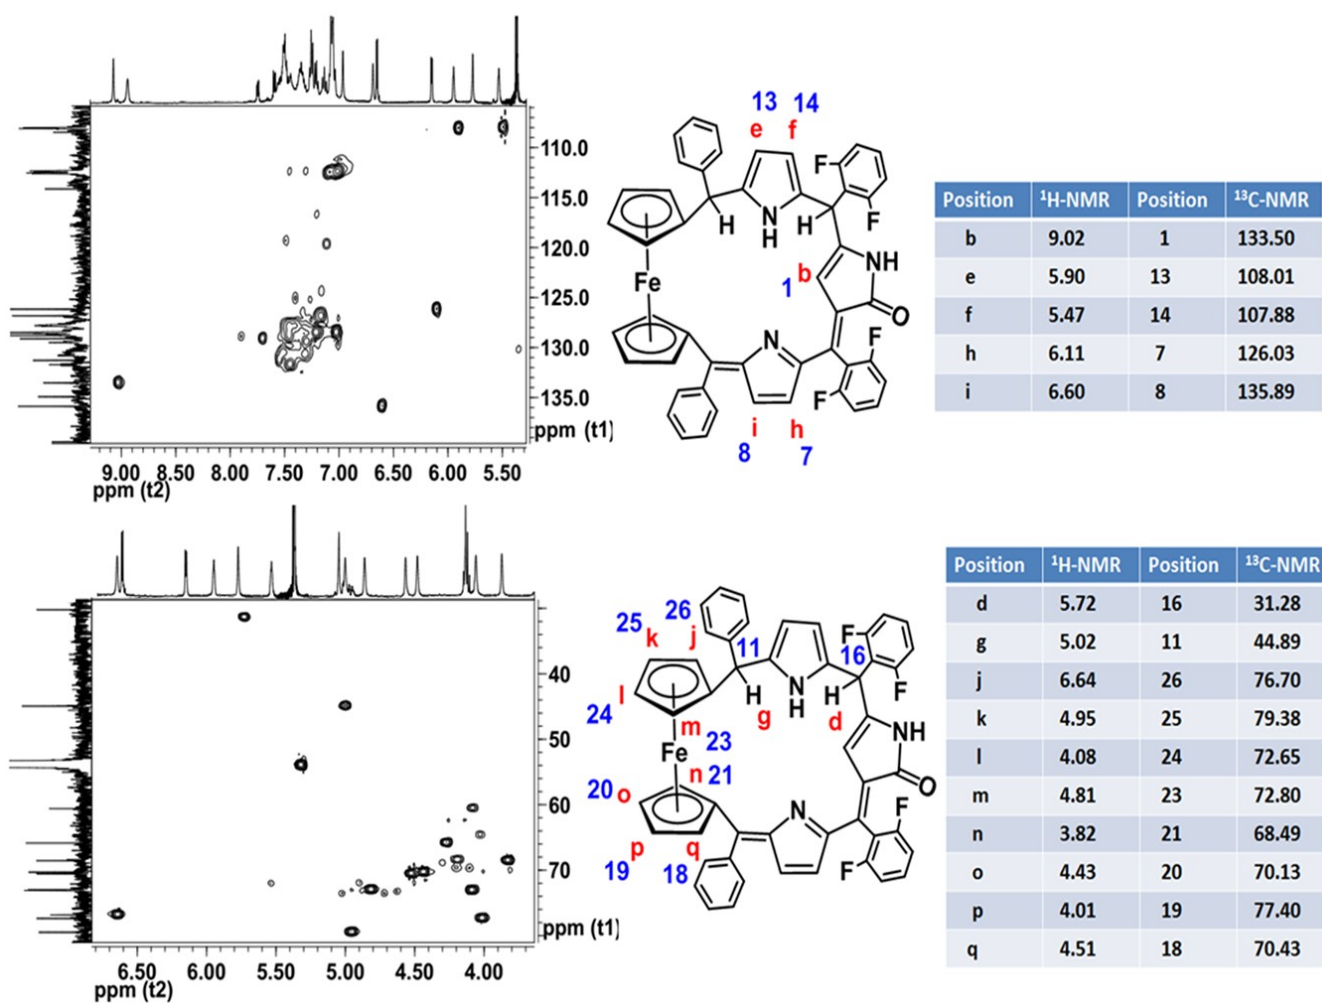

Fig. S28 HSQC NMR spectra of **5** in CD<sub>2</sub>Cl<sub>2</sub> at 298 K

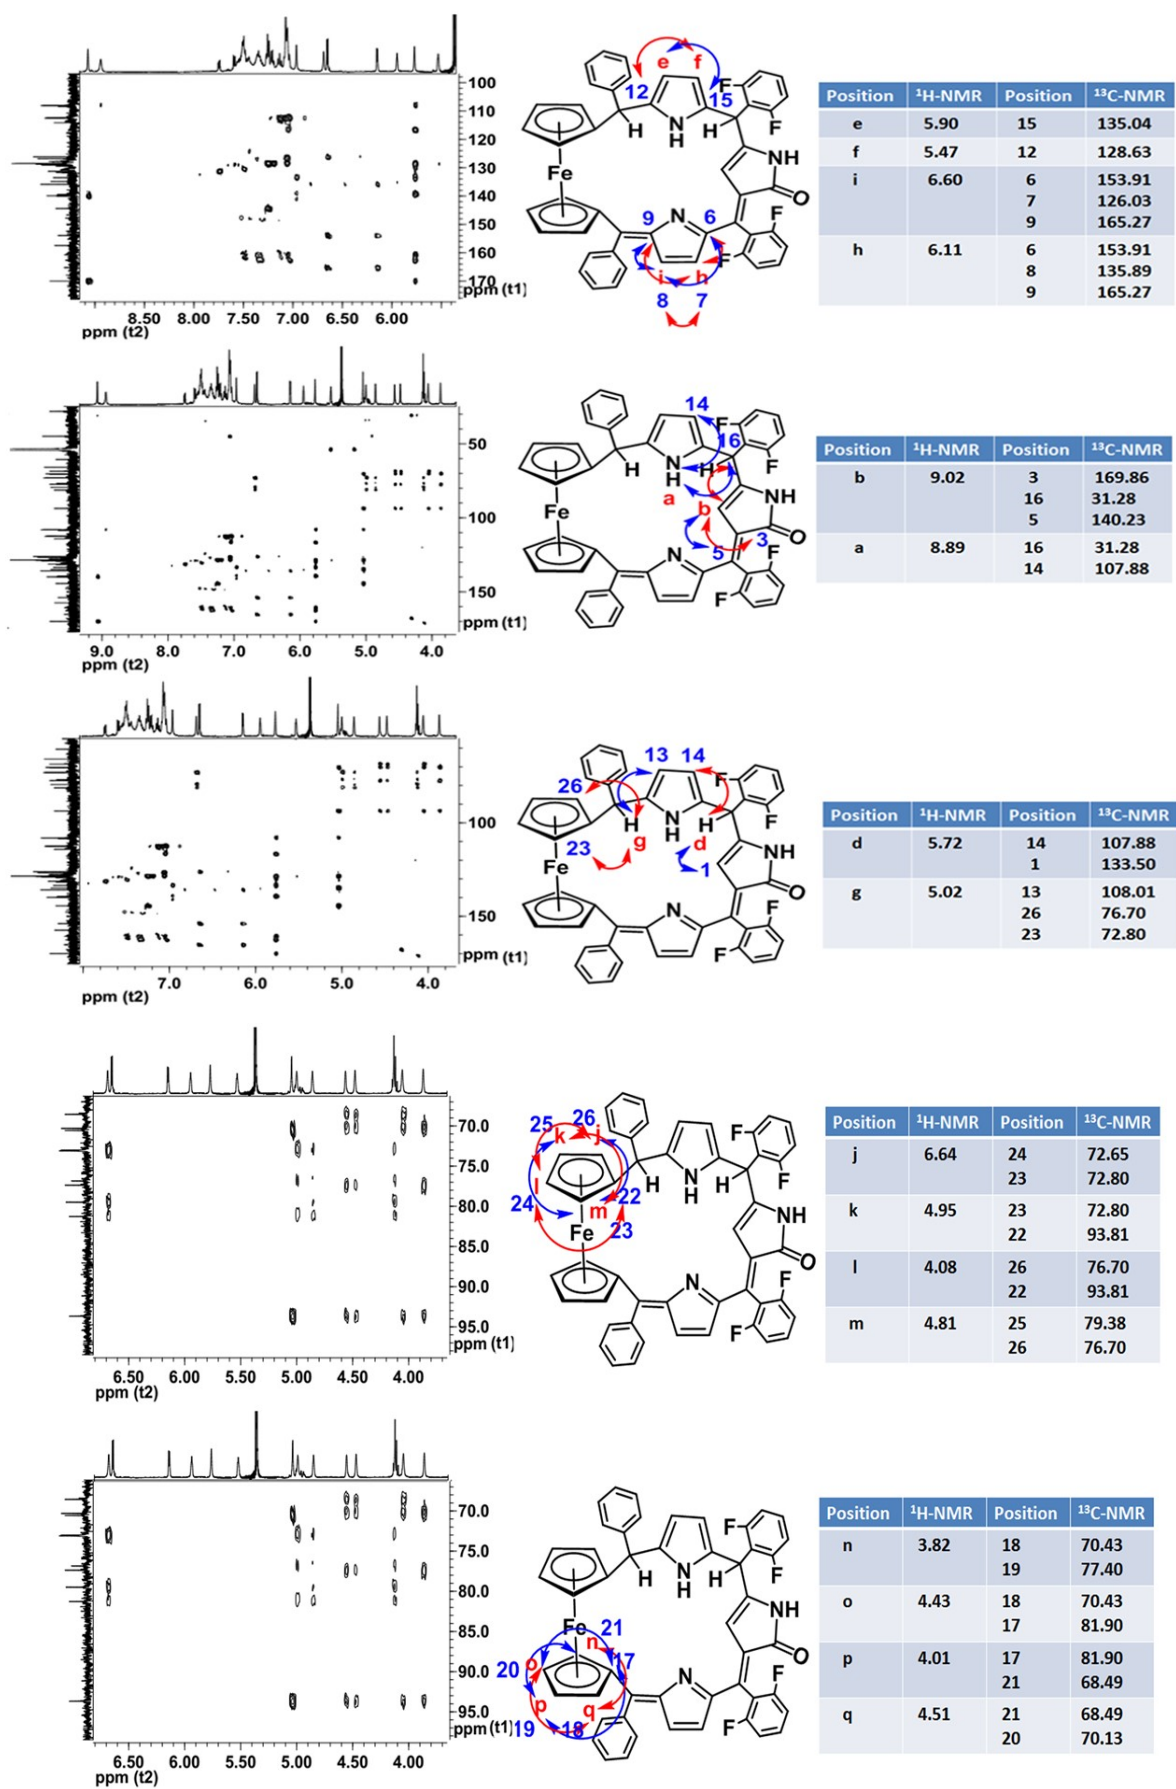

Fig. S29 HMBC NMR spectra of **5** in CD<sub>2</sub>Cl<sub>2</sub> at 298 K

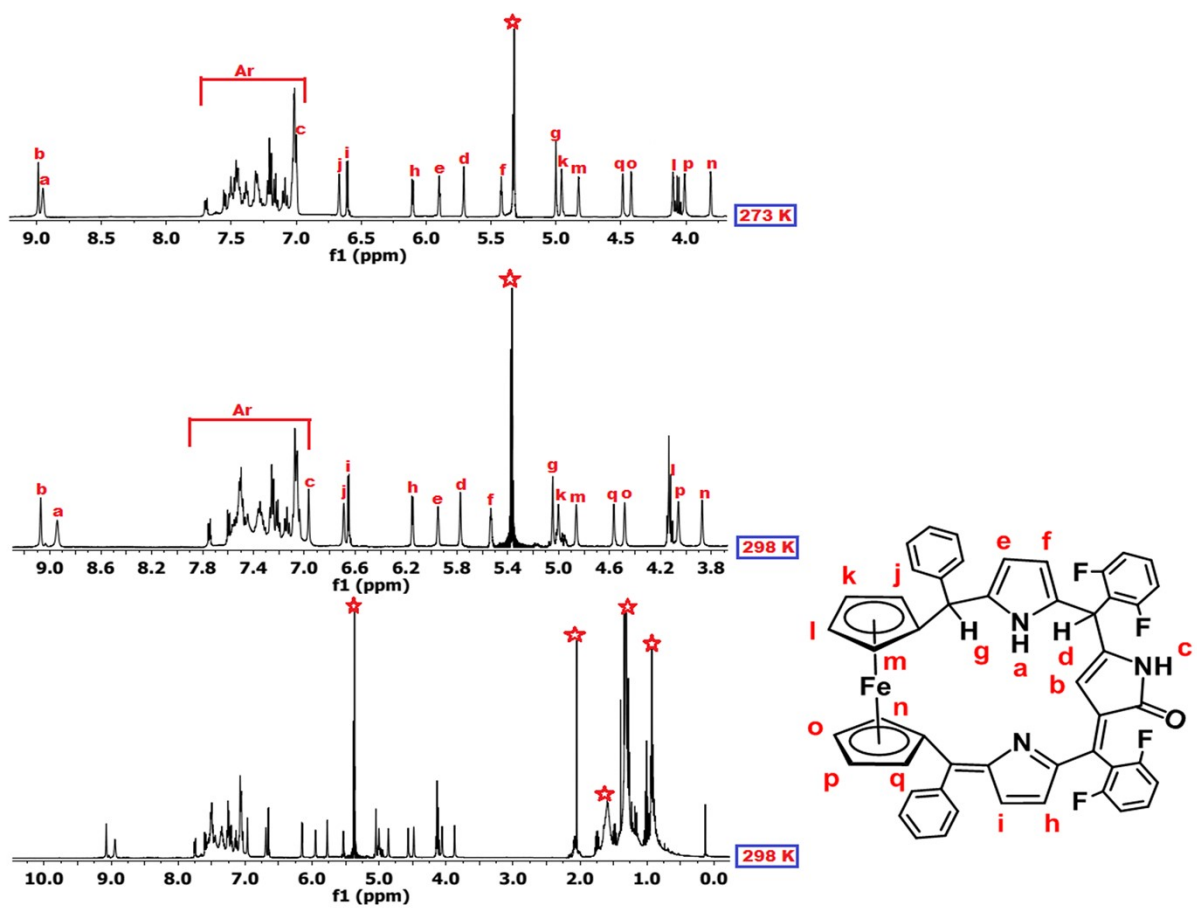

Fig. S30 Complete <sup>1</sup>H NMR spectral assignment of **5** in CD<sub>2</sub>Cl<sub>2</sub> at 298 K

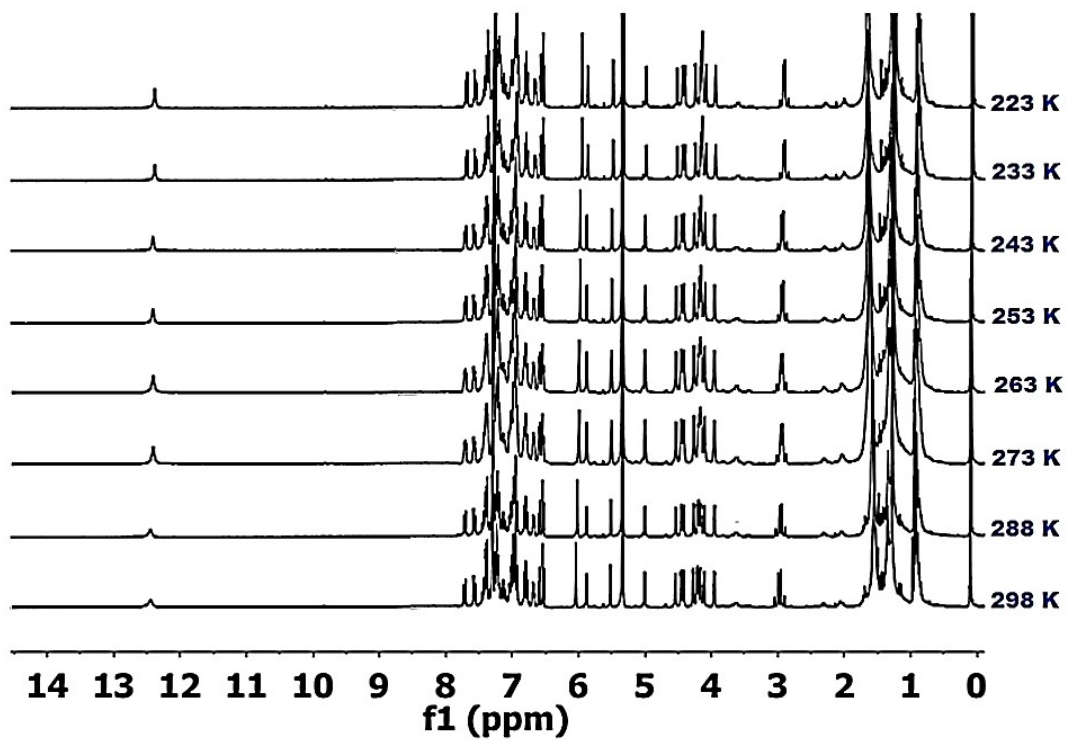

Fig. S31 Low VT <sup>1</sup>H NMR spectra of **6** in CD<sub>2</sub>Cl<sub>2</sub>

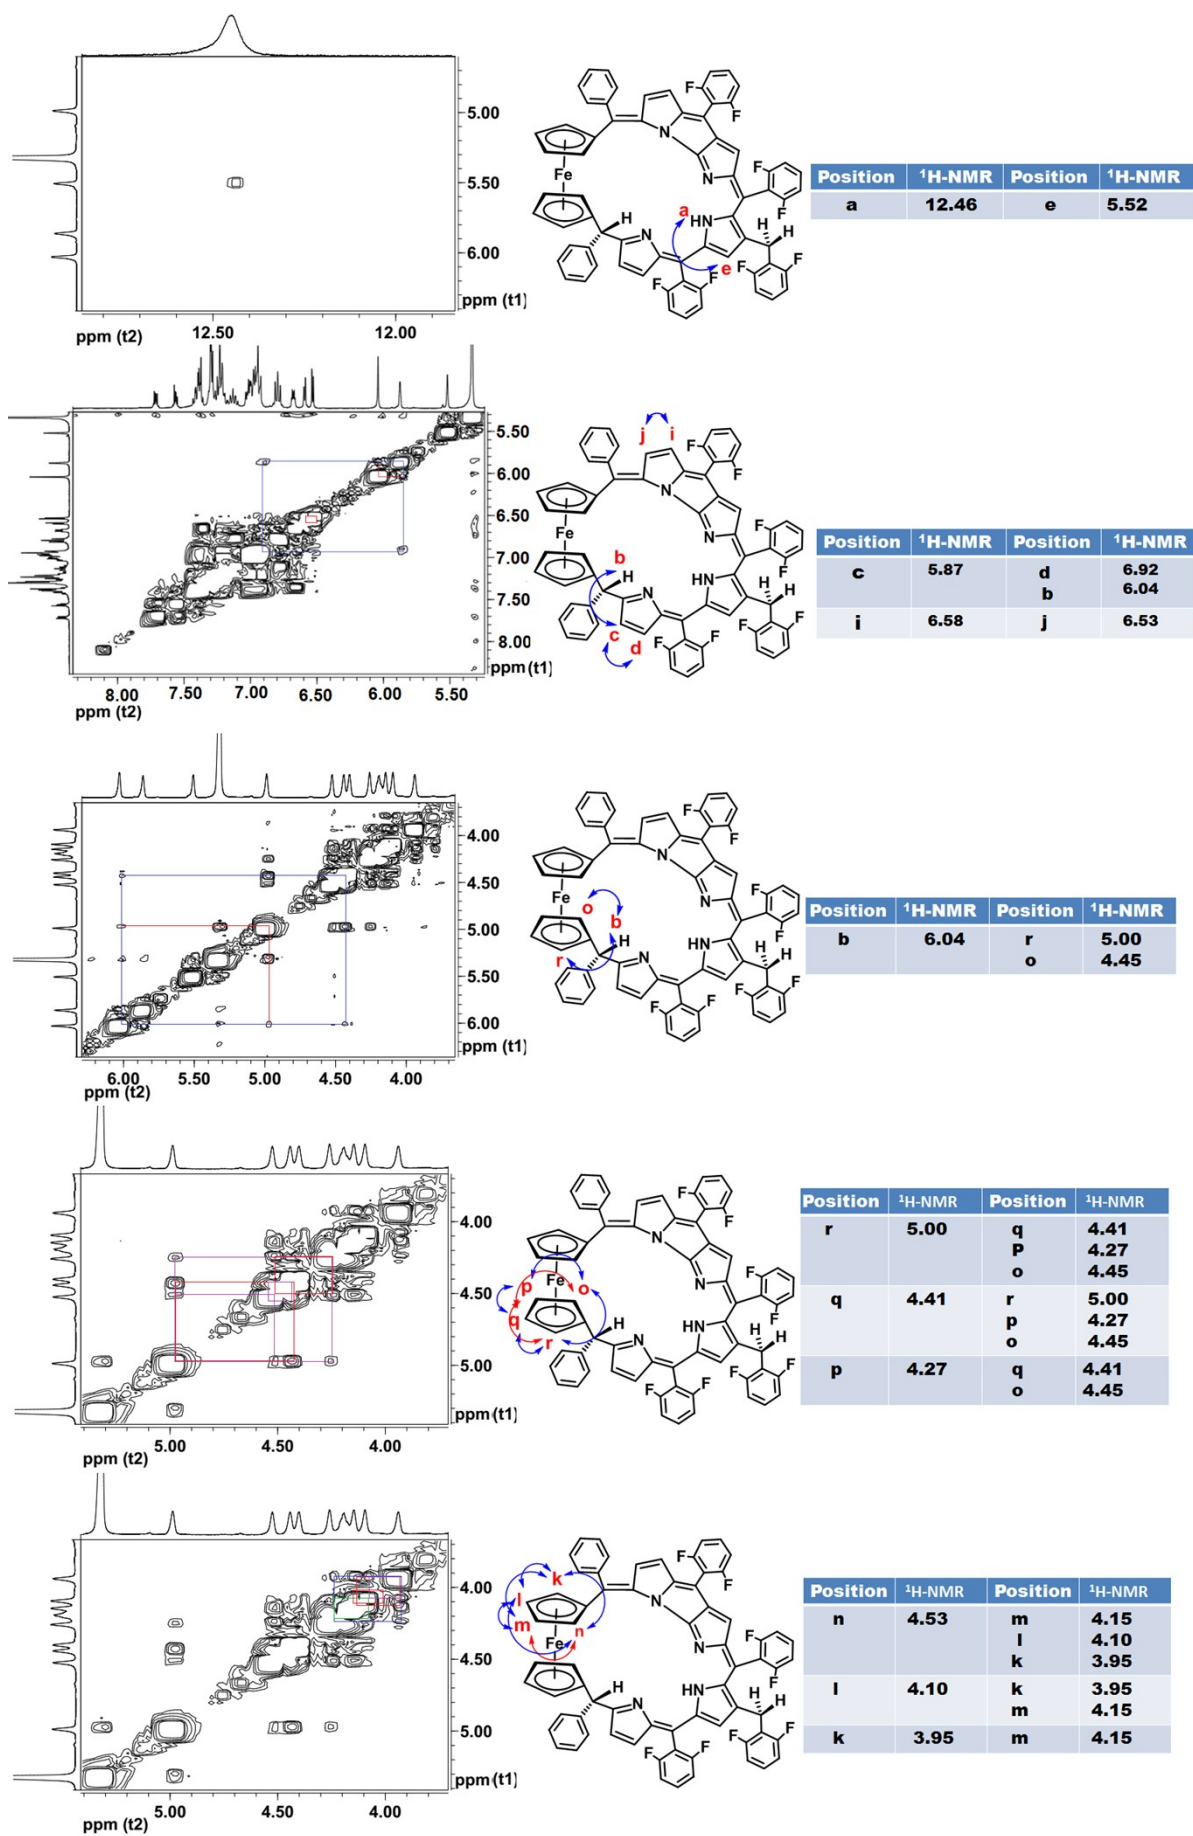

Fig. S32 <sup>1</sup>H -<sup>1</sup>H 2D COSY NMR spectra of **6** in CD<sub>2</sub>Cl<sub>2</sub> at 298 K

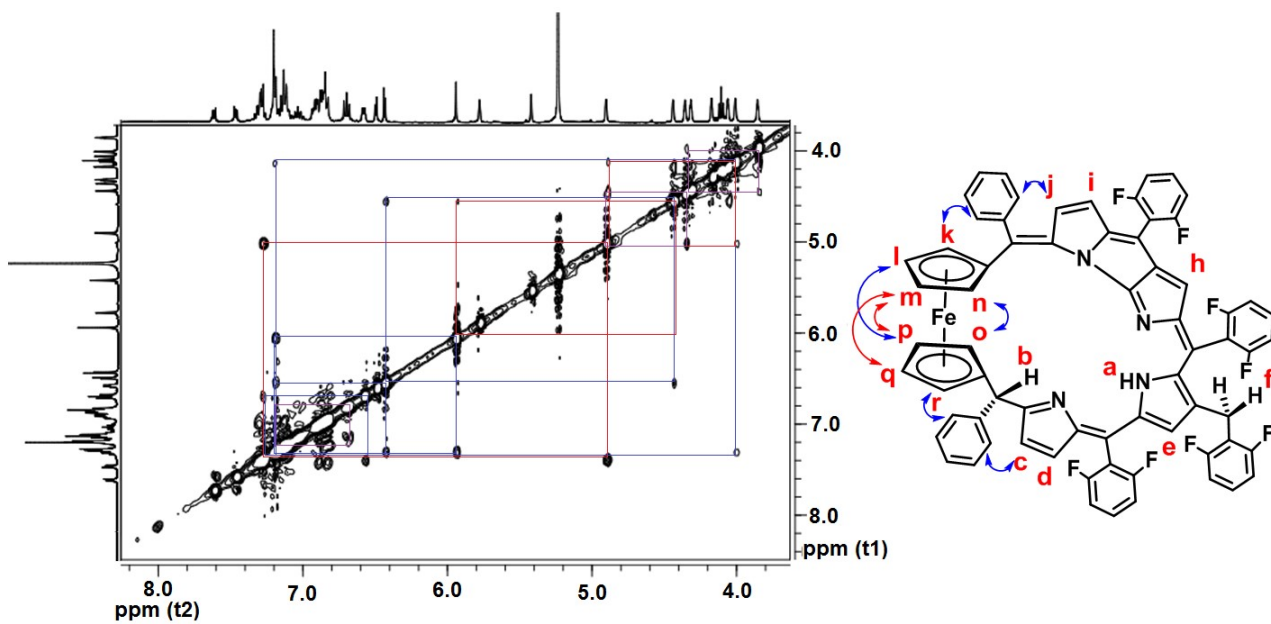

Fig. S33 <sup>1</sup>H -<sup>1</sup>H 2D ROESY NMR spectra of **6** in CD<sub>2</sub>Cl<sub>2</sub> at 298 K

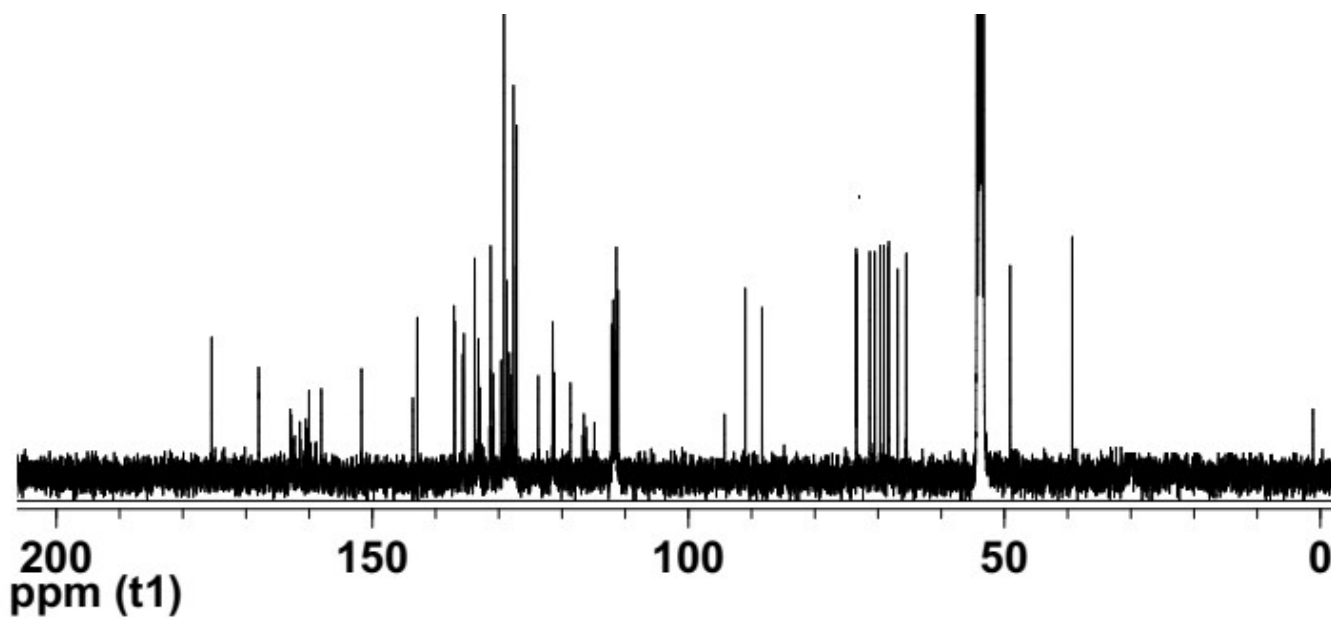

Fig. S34 <sup>13</sup>C NMR spectrum of **6** in CD<sub>2</sub>Cl<sub>2</sub> at 298 K



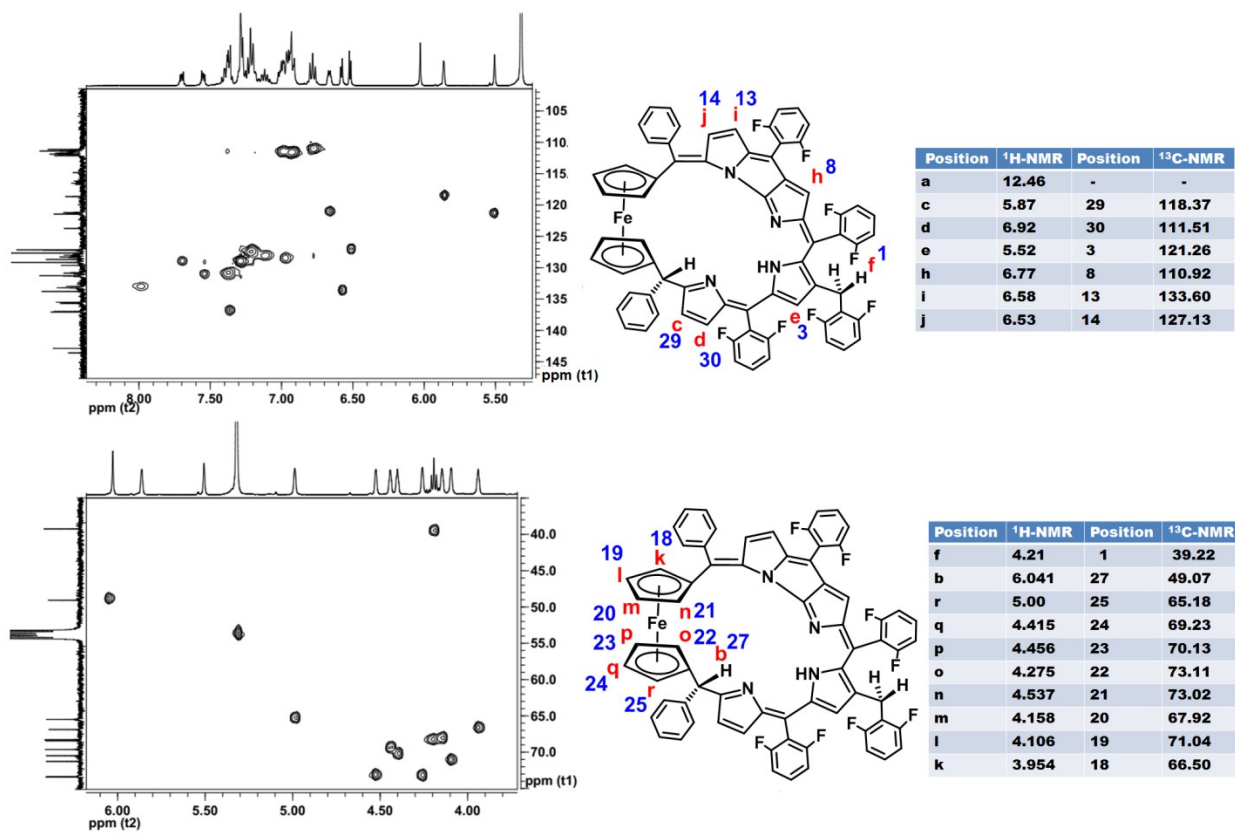

Fig. S35 HSQC NMR spectra of **6** in CD<sub>2</sub>Cl<sub>2</sub> at 298 K

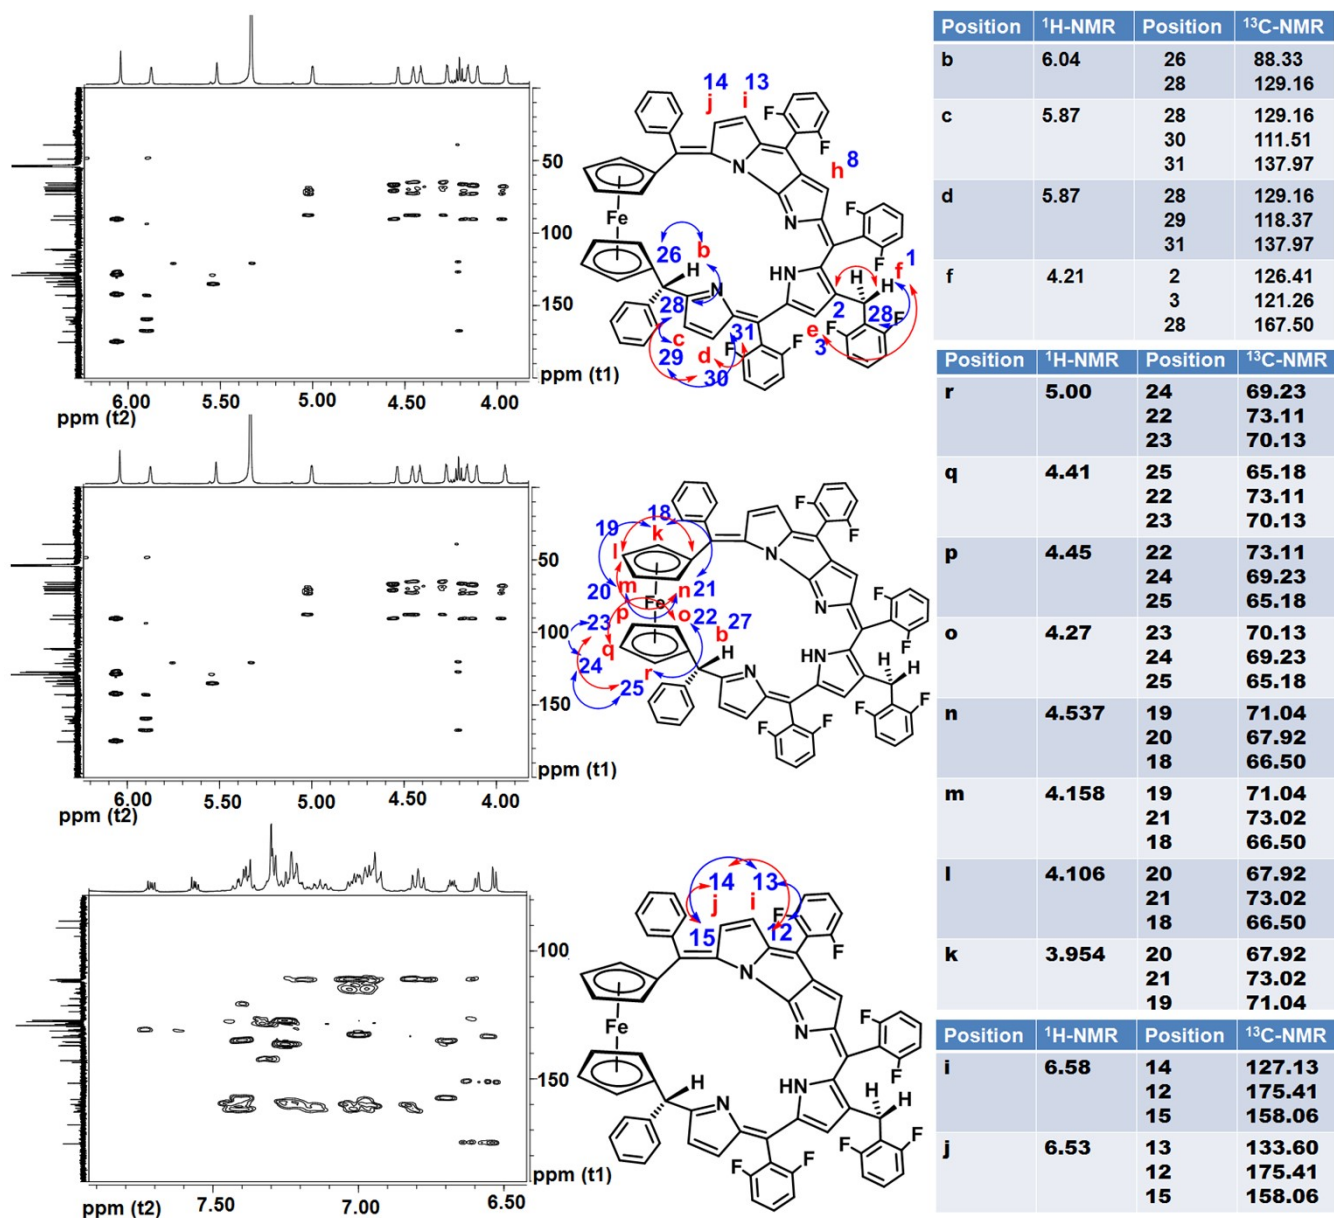

Fig. S36 HMBC NMR spectra of **6** in CD<sub>2</sub>Cl<sub>2</sub> at 298 K

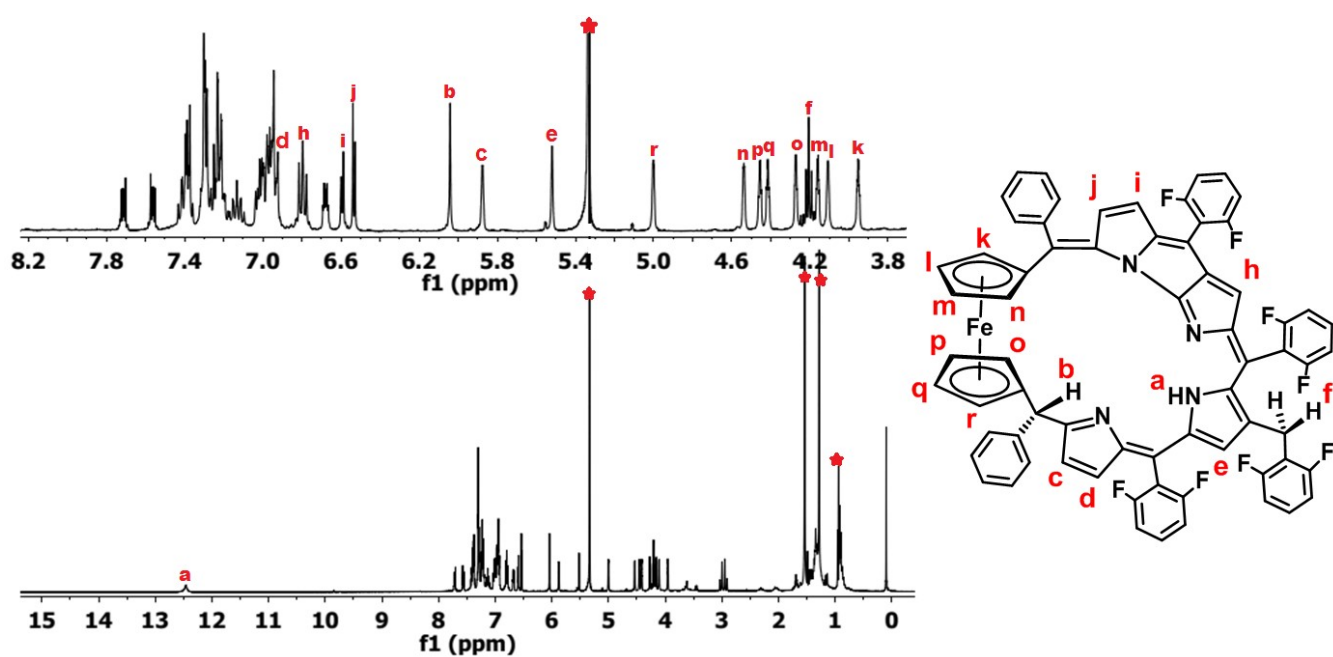

Fig. S37 Complete  $^1\text{H}$  NMR spectral assignment of **6** in  $\text{CD}_2\text{Cl}_2$  at 298 K

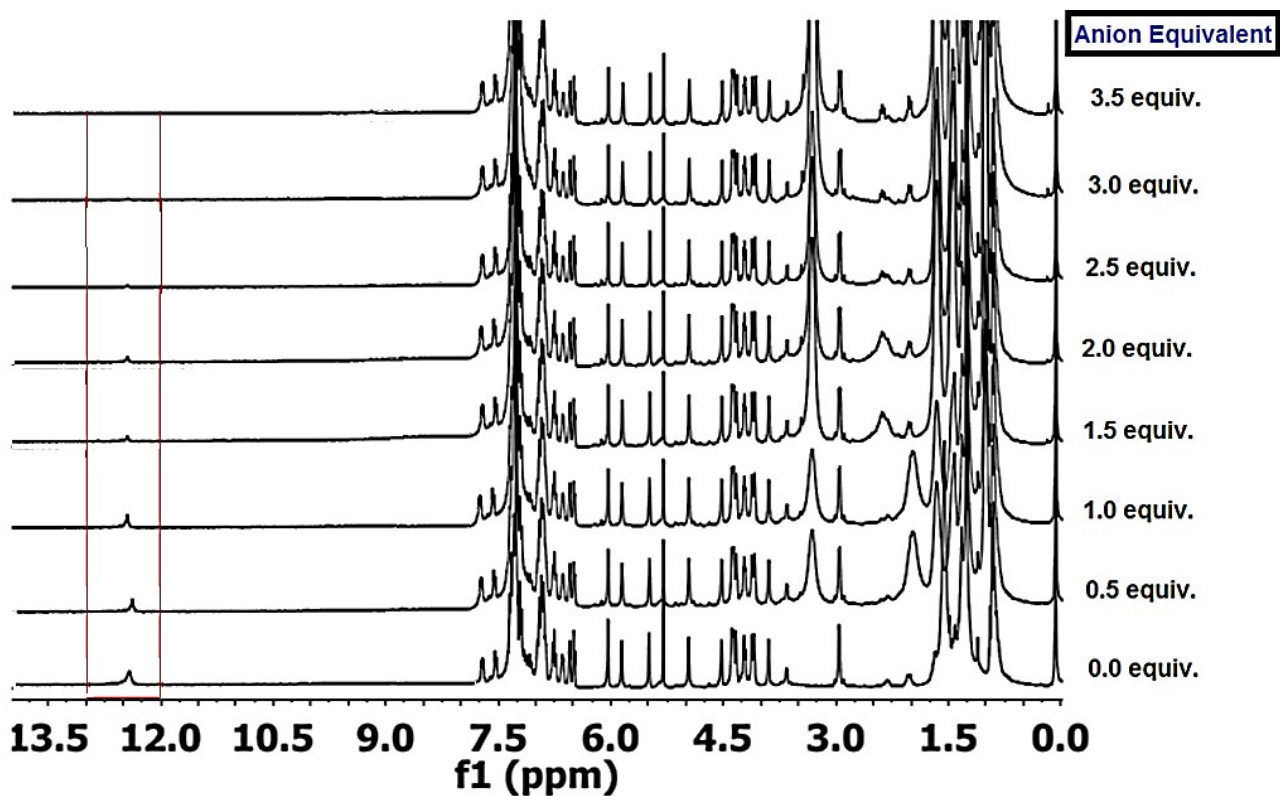

Fig. S38  $^1\text{H}$  NMR spectral pattern of **6** upon TBAF titration in  $\text{CDCl}_3$



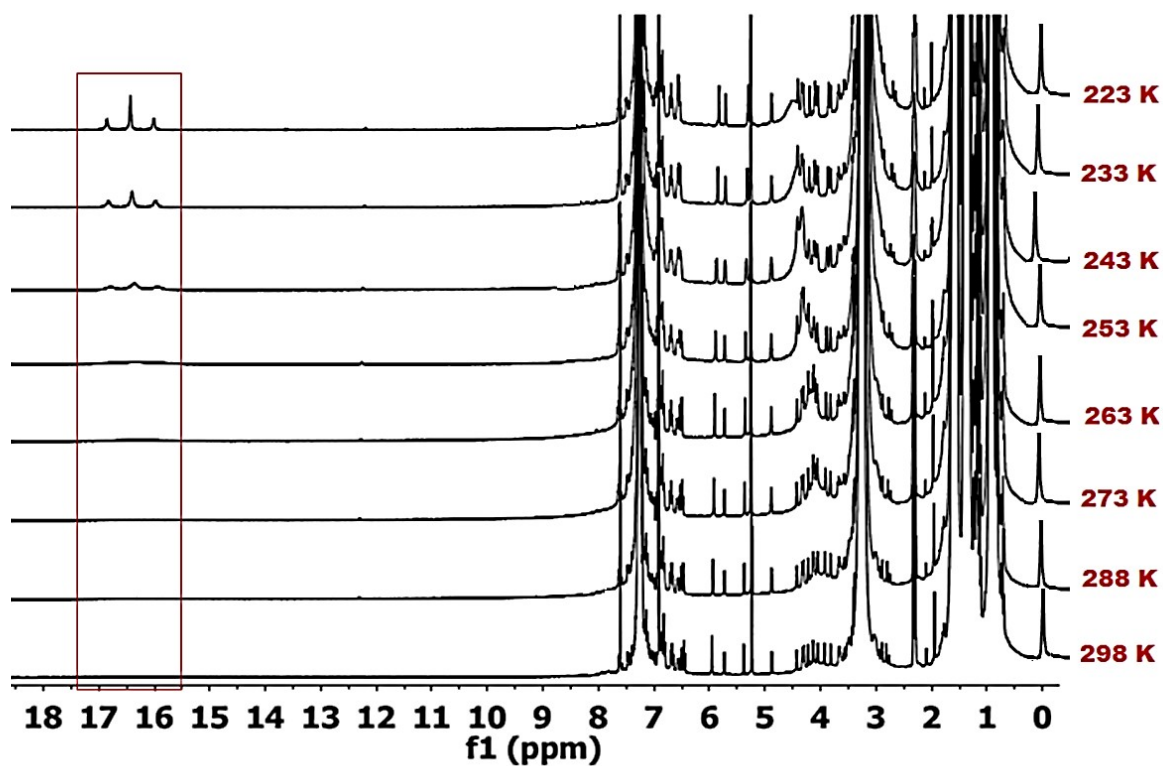

Fig. S39 Low VT  $^1\text{H}$  NMR spectral pattern of **6** upon TBAF titration in  $\text{CDCl}_3$

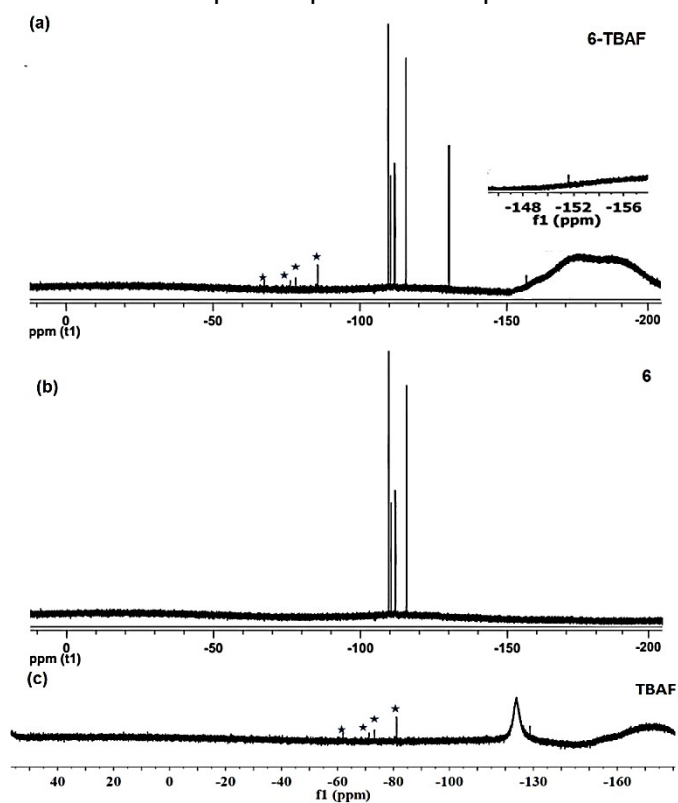

Fig. S40  $^{19}\text{F}$  NMR spectral pattern of (c) TBAF, (b) **6** and (a) **6**-TBAF in  $\text{CDCl}_3$  at 298 K (\* from -80 to -60 ppm correspond to unknown impurities of TBAF)

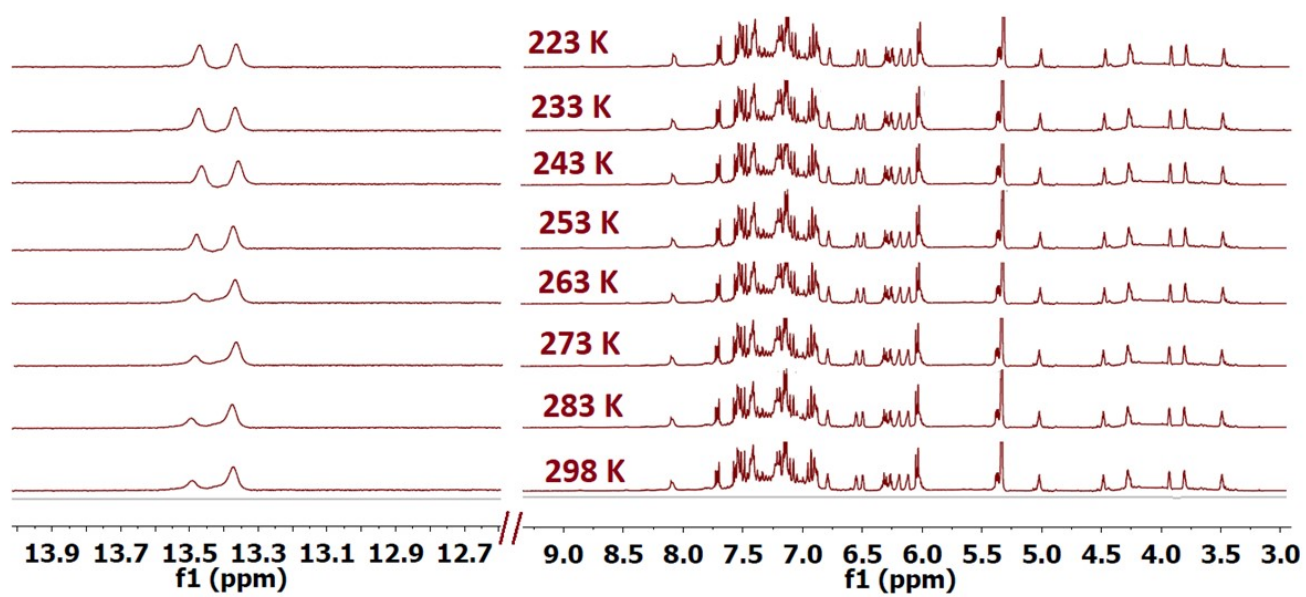

Fig. S41 Variable Low VT <sup>1</sup>H NMR spectra of 7 in CD<sub>2</sub>Cl<sub>2</sub>

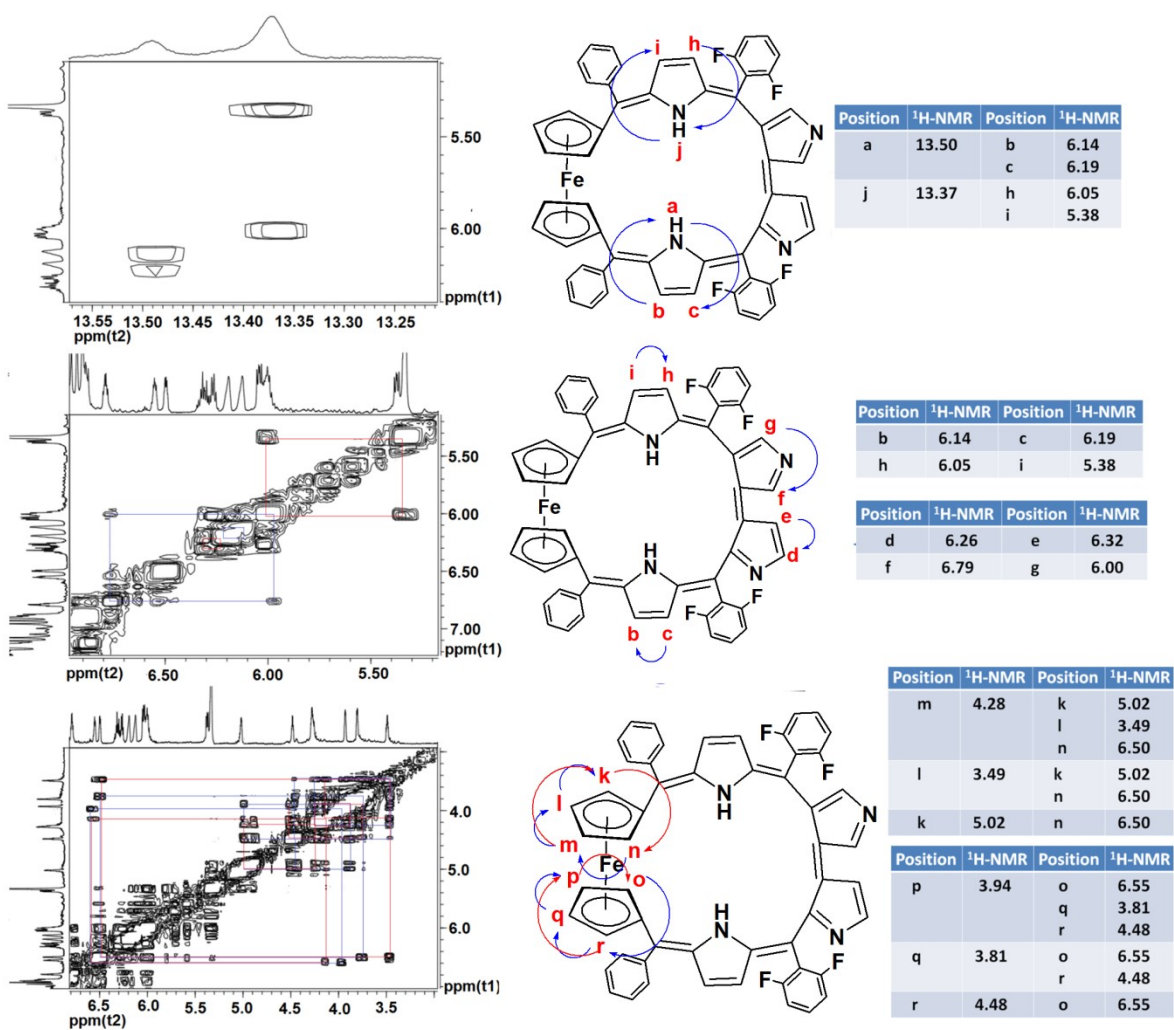

Fig. S42  $^1\text{H}$ - $^1\text{H}$  2D COSY spectra of **7** in  $\text{CD}_2\text{Cl}_2$  at 298 K

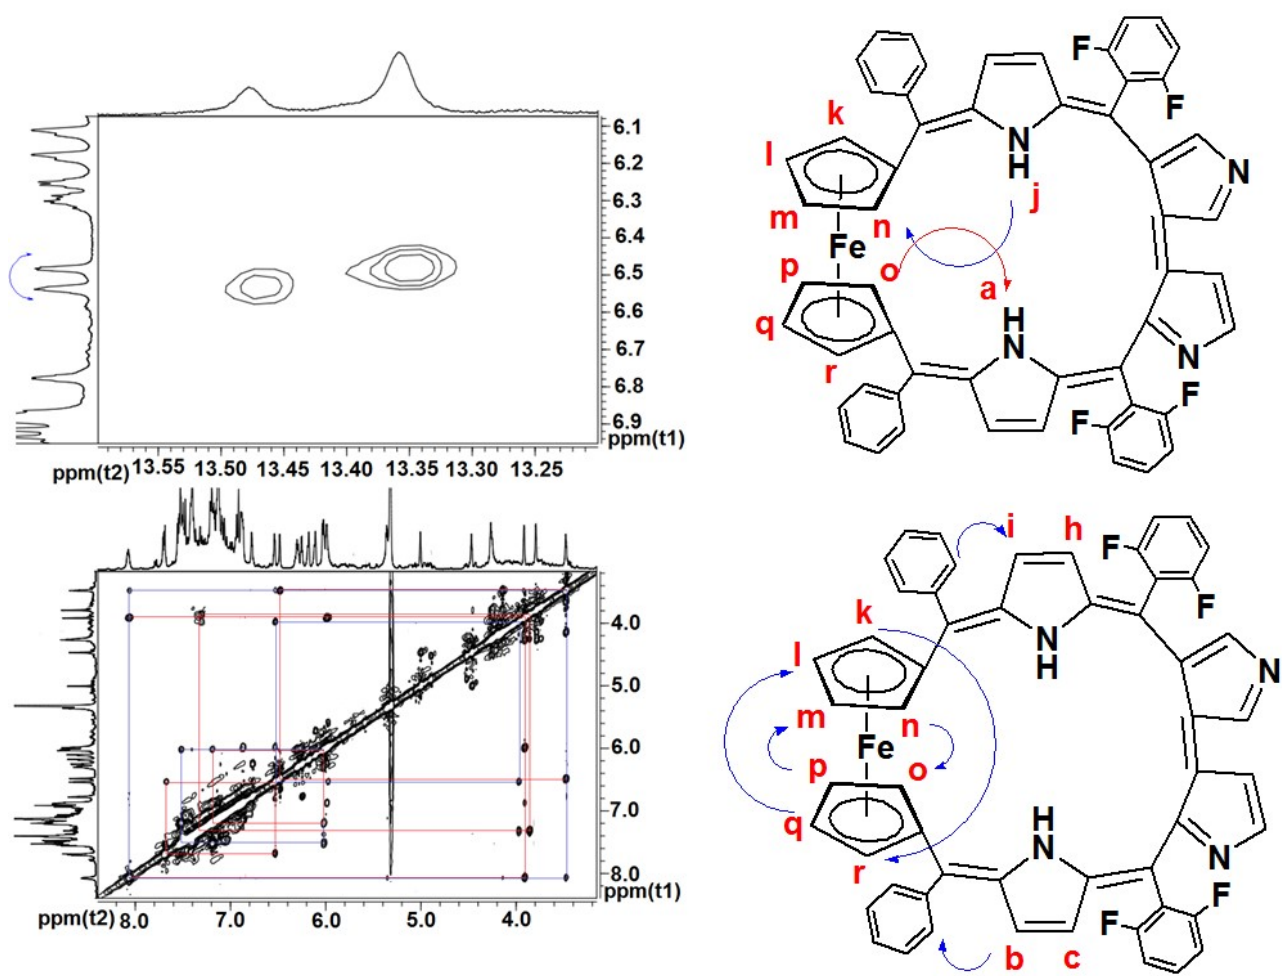

Fig. S43  $^1\text{H}$ - $^1\text{H}$  2D ROESY spectra of **7** in  $\text{CD}_2\text{Cl}_2$  at 298 K

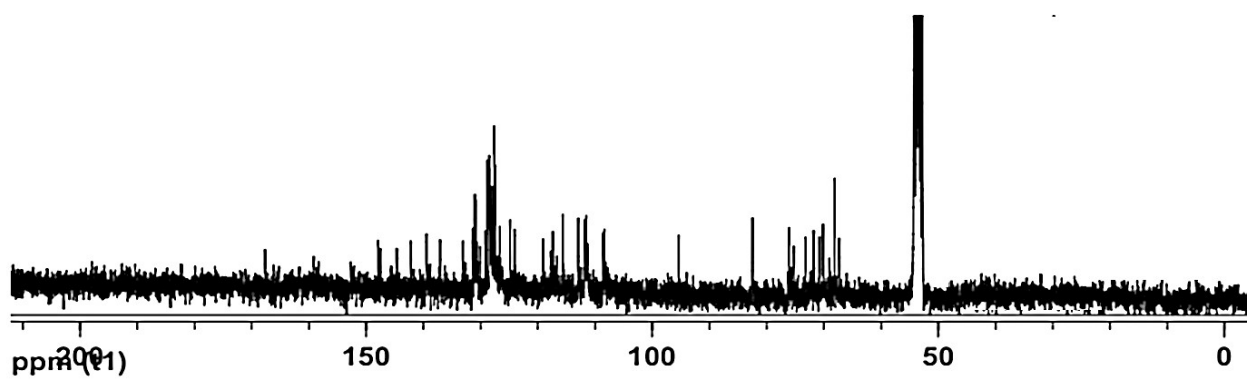

Fig. S44  $^{13}\text{C}$  NMR spectra of **7** in  $\text{CD}_2\text{Cl}_2$  at 298 K

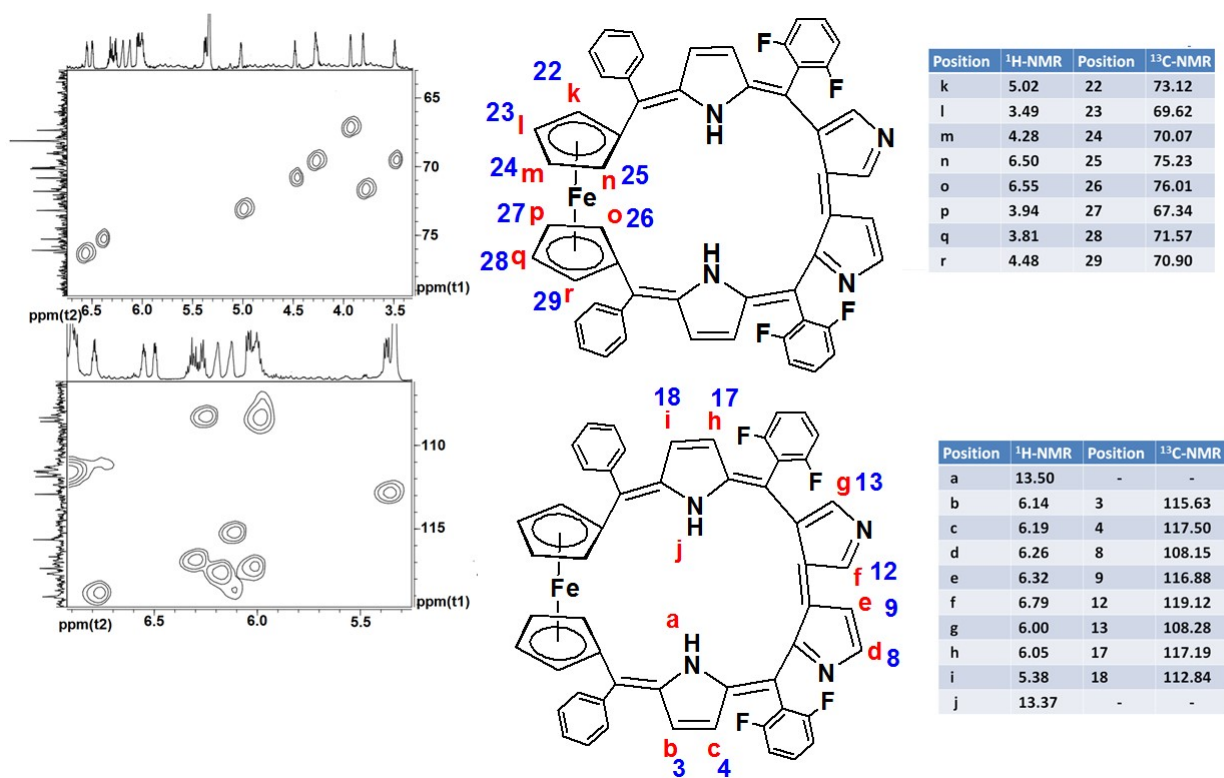

Fig. S45 HSQC NMR spectra of **7** in CD<sub>2</sub>Cl<sub>2</sub> at 298 K

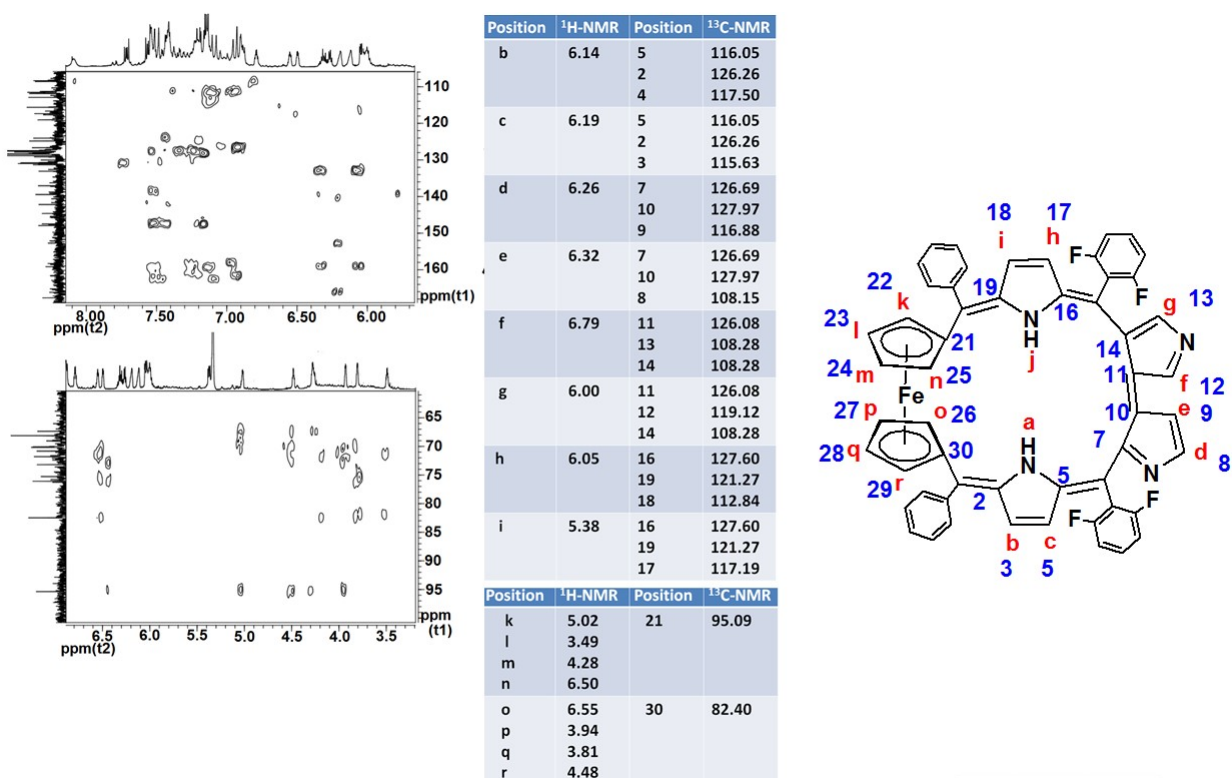

Fig. S46 HMBC NMR spectra of **7** in CD<sub>2</sub>Cl<sub>2</sub> at 298 K

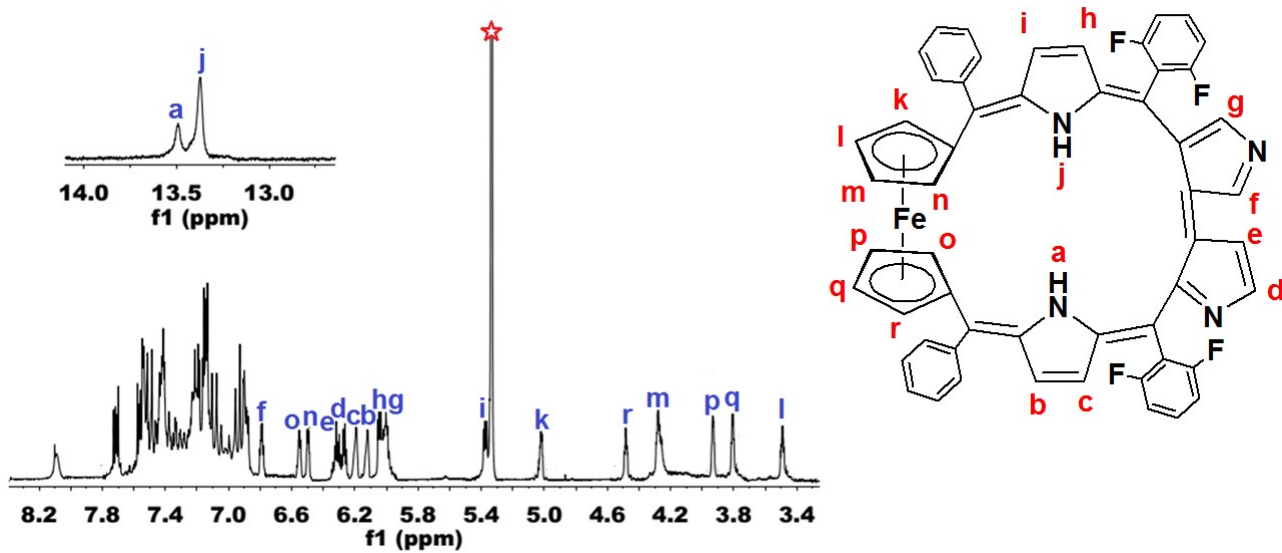

Fig. S47 Complete  $^1\text{H}$  NMR spectral assignment of **7** in  $\text{CD}_2\text{Cl}_2$  at 298 K



## 2.5. Electrochemistry

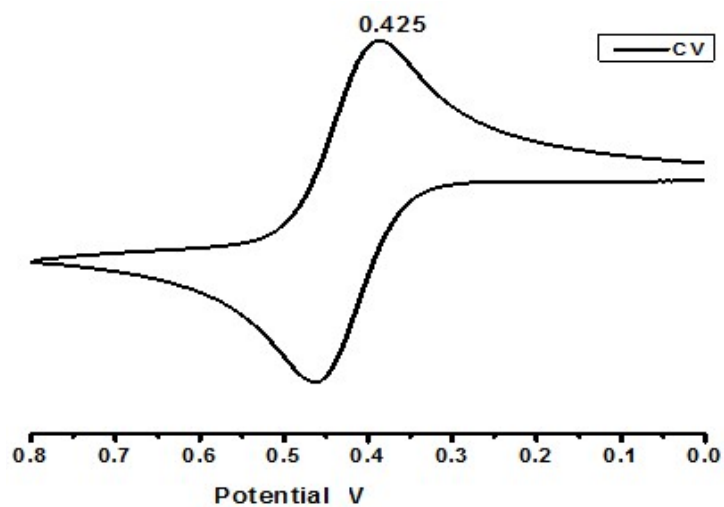

Fig. S48 Cyclic voltammogram of ferrocene in  $\text{CH}_2\text{Cl}_2$  at 298 K

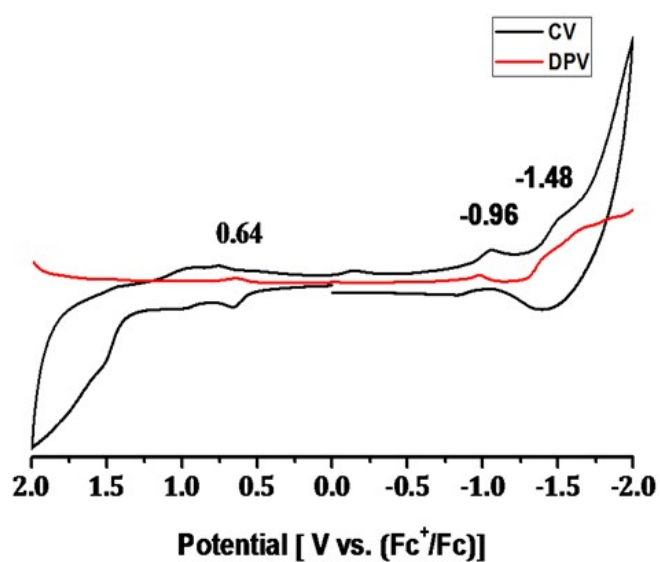

Fig. S49 Cyclic voltammogram of **5** in  $\text{CH}_2\text{Cl}_2$  at 298 K

### 3. X-ray Crystal Data

| Parameters                          | 6                                                               |
|-------------------------------------|-----------------------------------------------------------------|
| Chemical formula                    | C <sub>68</sub> H <sub>40</sub> F <sub>8</sub> FeN <sub>4</sub> |
| Formula weight                      | 1120.89                                                         |
| Temperature                         | 100 K                                                           |
| Crystal system                      | Triclinic                                                       |
| Space group                         | P-1                                                             |
| a (Å); α (°)                        | 10.8521(18); 118.145(5)                                         |
| b (Å); β (°)                        | 17.560(3); 93.156(5)                                            |
| c (Å); γ (°)                        | 17.760(3); 99.868(5)                                            |
| V (Å <sup>3</sup> ); Z              | 2903.9(8); 2                                                    |
| ρ (calc.) g m <sup>-3</sup>         | 1.282                                                           |
| μ(Mo Kα) mm <sup>-1</sup>           | 0.701                                                           |
| 2θ <sub>max</sub> (°)               | 54.542                                                          |
| R(int)                              | 0.0821                                                          |
| Completeness to θ                   | 0.984                                                           |
| Data / param.                       | 10092/730                                                       |
| GOF                                 | 1.042                                                           |
| R1 [F>4σ(F)]                        | 0.0756                                                          |
| wR2 (all data)                      | 0.1880                                                          |
| max. peak/hole (e.Å <sup>-3</sup> ) | 0.46/-0.62                                                      |
| CCDC                                | 2053405                                                         |



## 4. Theoretical Calculation

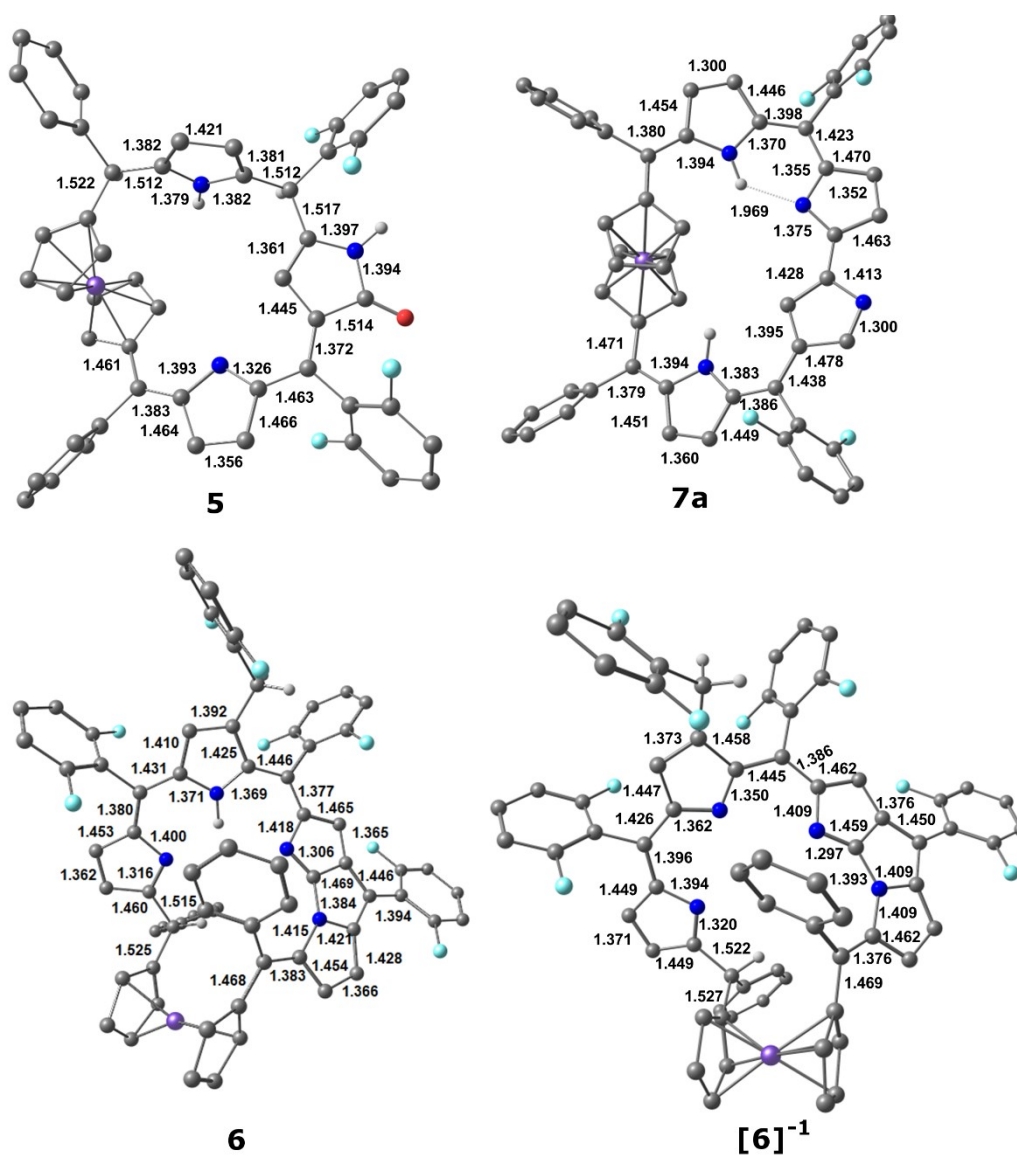

Fig. S50 DFT optimised geometries and key bond length parameters (Å) of **5**, **6**, **6**-deprotonated and **7a**, at uB3LYP/LanL2DZ (Fe) and 6-31+G\*\* (for rest of the atoms) level of theory. Note that **6** is the optimised structure of X-ray crystal structure.

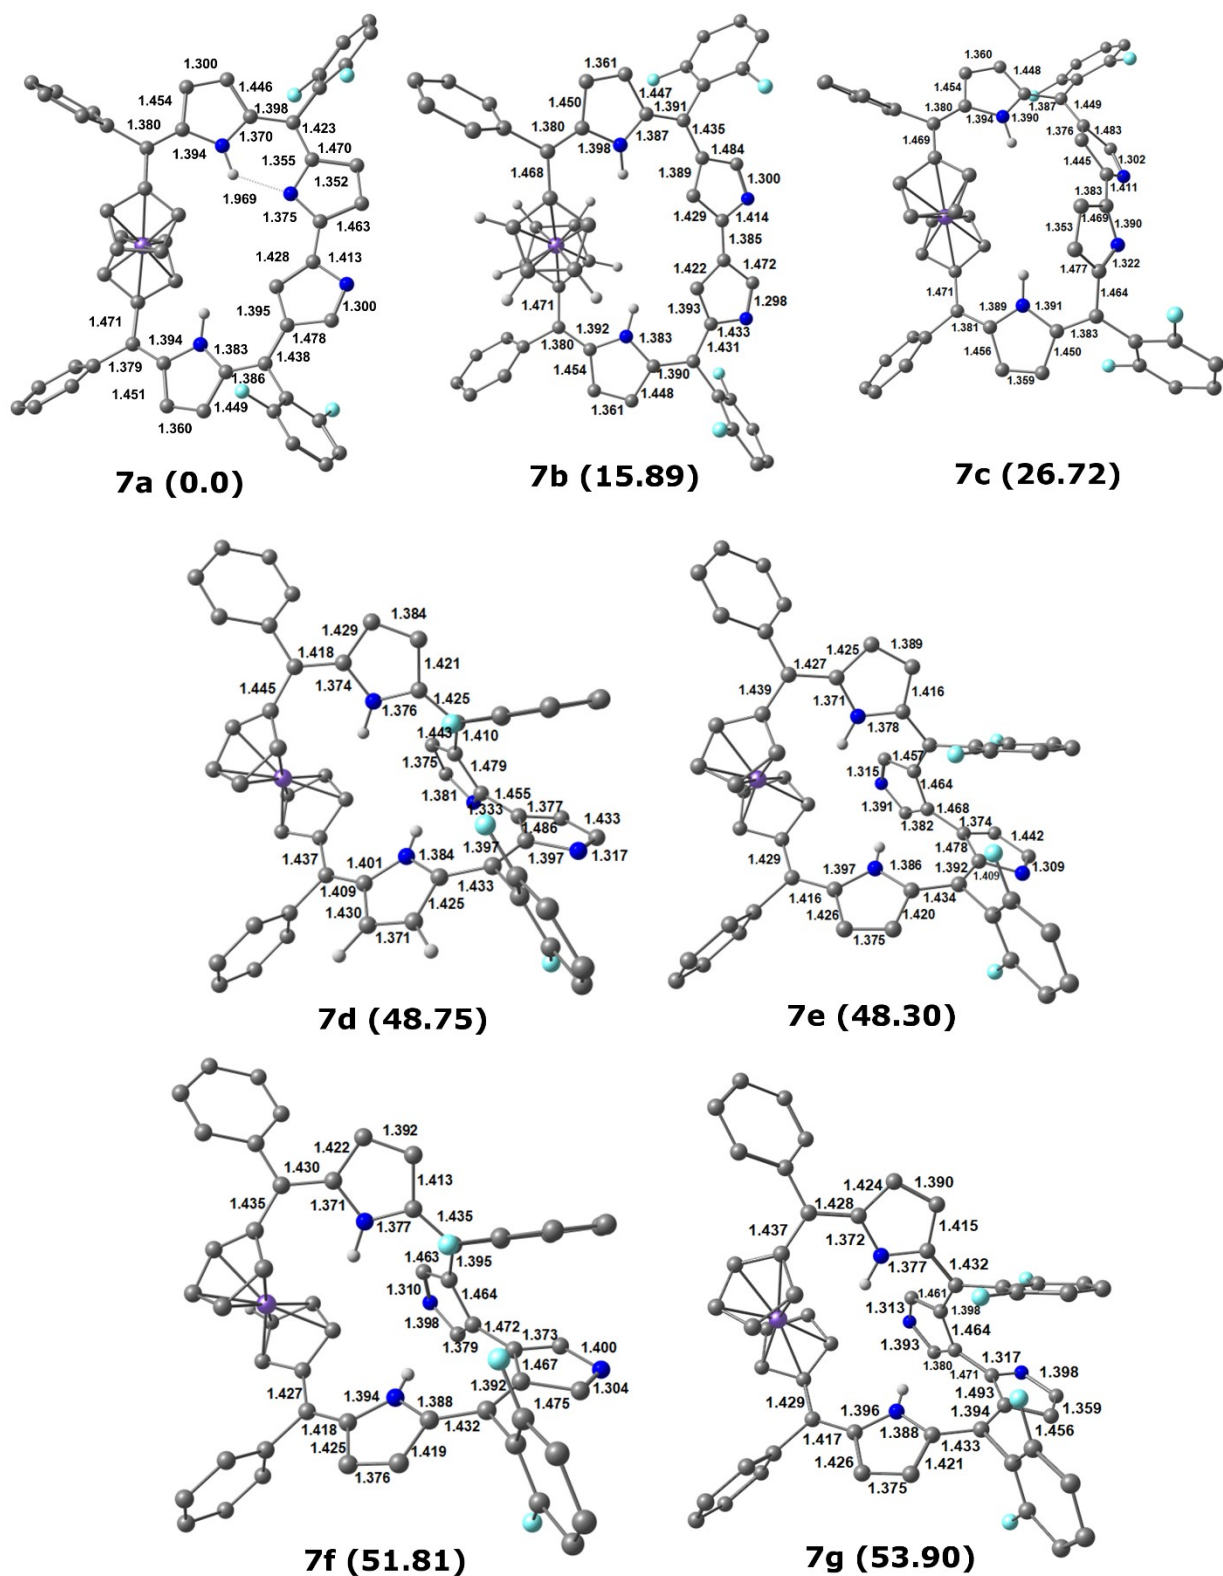

Fig. S51 DFT optimised geometries and key bond length parameters (Å) of isomers of **7a-7g**, at uB3LYP/LanL2DZ (Fe) and 6-31+G\*\* (for rest of the atoms) level of theory.

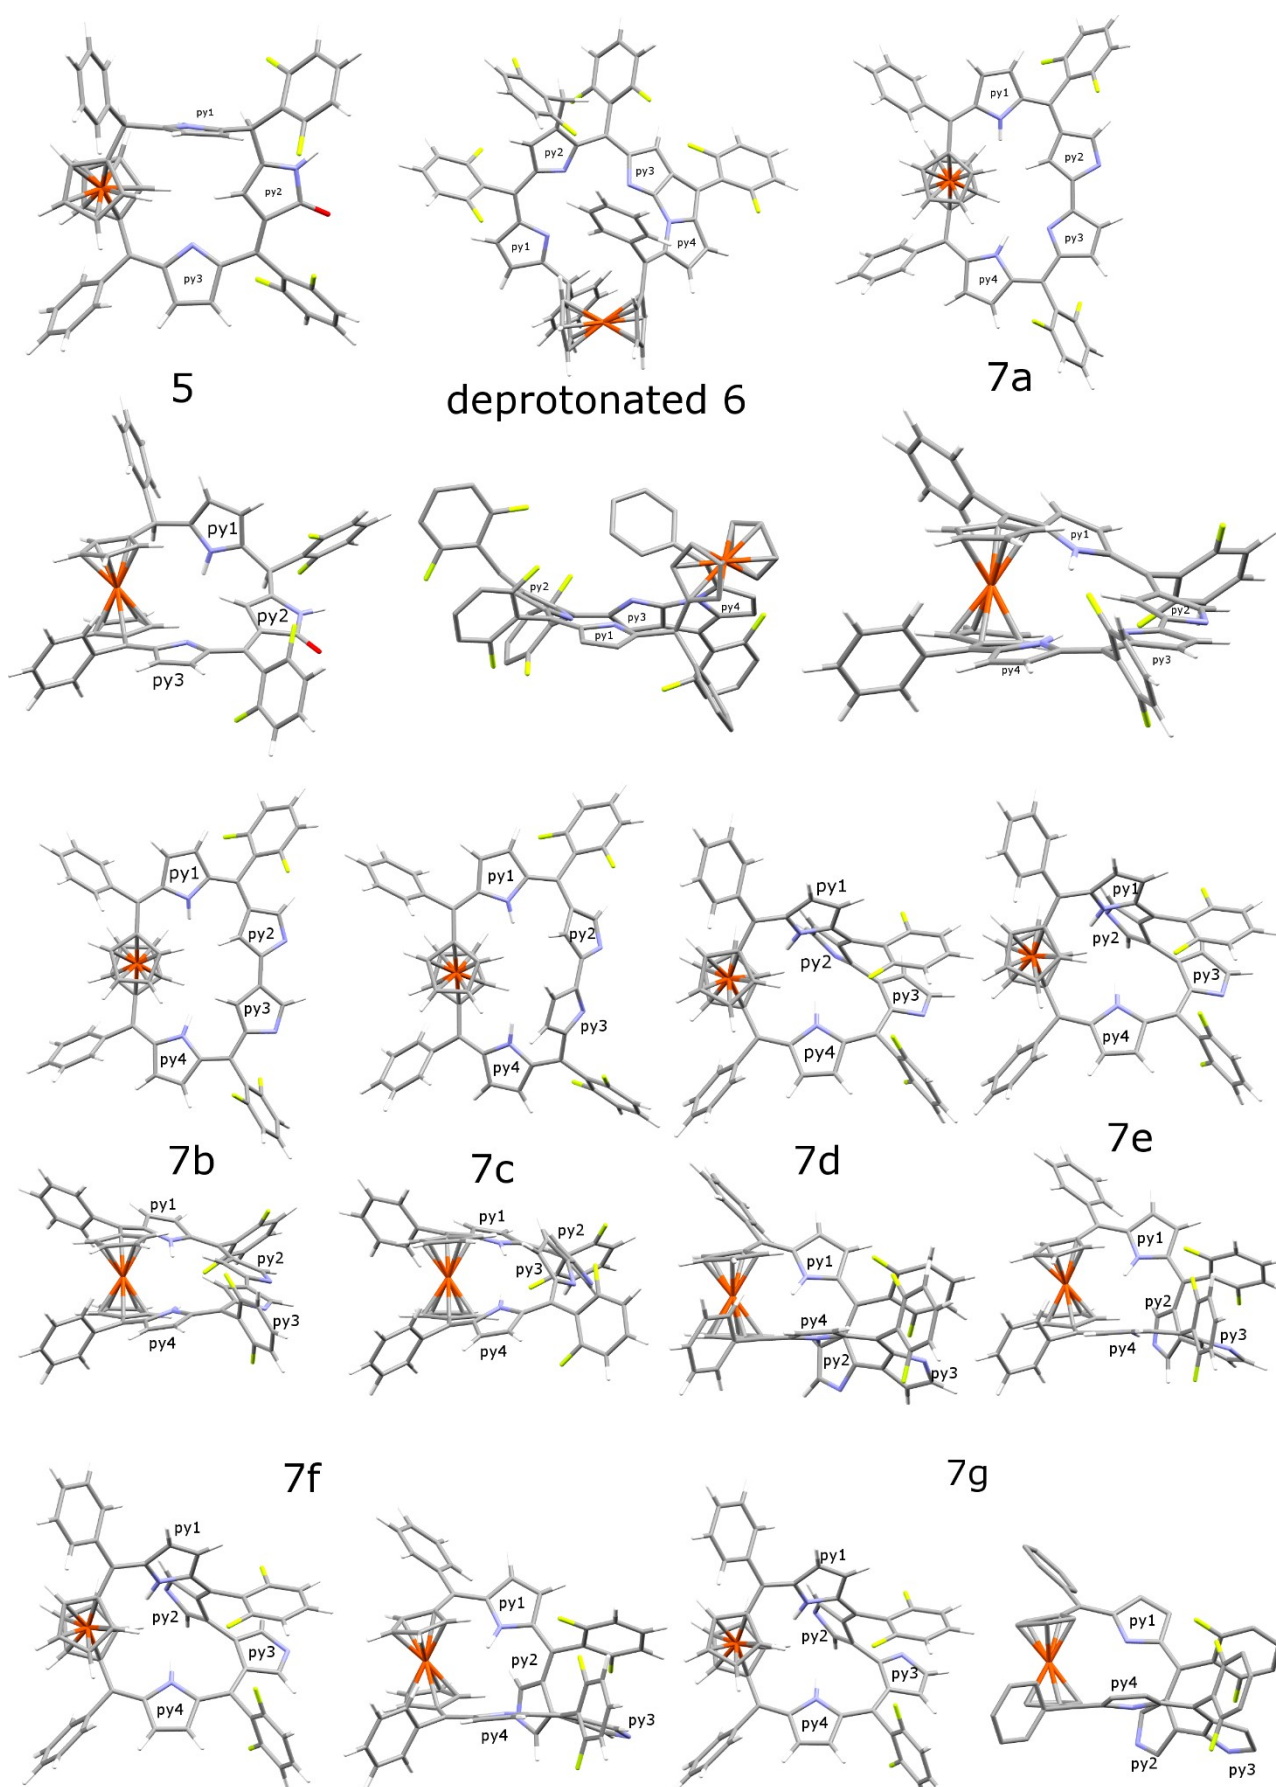

Fig. S52 Top and side view of DFT optimised geometries of **5**, **6-deprotonated** and **7a-7g**, at uB3LYP/LanL2DZ (Fe) and 6-31+G\*\* (for rest of the atoms) level of theory.

Table S1: Dihedral angle planes of pyrrole rings for DFT optimised geometries of **5**, **6**, deprotonated **6** and **7a-7g** at uB3LYP/LanL2DZ (Fe) and 6-31+G\*\* (for rest of the atoms) level of theory.

| S. No | <b>5</b>      | <b>6</b>       | Deprotonated [ <b>6</b> ] <sup>-1</sup> |                |
|-------|---------------|----------------|-----------------------------------------|----------------|
| 1     | py1—py2 -79.7 | py1—py2 -10.15 | py1—py2 -26.8                           |                |
| 2     | py2—py3 -25.8 | py2—py3 -33.08 | py2—py3 -45.5                           |                |
| 3     | py3—cp1 -7.2  | py3—py4 -4.59  | py3—py4 -9.73                           |                |
| 4     | py1—cp2 -84.7 | py4—cp1 -37.47 | py4—cp1 -46.4                           |                |
| 5     |               | py1—cp2 -56.03 | py1—cp2 -89.1                           |                |
|       | <b>7a</b>     | <b>7b</b>      | <b>7c</b>                               |                |
| 1     | py1—py2 -12.1 | py1—py2 -10.8  | py1—py2 -39.9                           |                |
| 2     | py2—py3 -21.9 | py2—py3 -7.4   | py2—py3 -31.9                           |                |
| 3     | py3—py4 -33.5 | py3—py4 -30.9  | py3—py4 -64.3                           |                |
| 4     | py4—cp1 -12.8 | py4—cp1 -16.5  | py4—cp1 -0.0                            |                |
| 5     | py1—cp2 -29.7 | py1—cp2 -27.77 | py1—cp2 -18.2                           |                |
|       | <b>7d</b>     | <b>7e</b>      | <b>7f</b>                               | <b>7g</b>      |
| 1     | py1—py2 -54.6 | py1—py2 -52.9  | py1—py2 -52.9                           | py1—py2 -54.26 |
| 2     | py2—py3 -55.5 | py2—py3 -66.5  | py2—py3 -71.2                           | py2—py3 -65.63 |
| 3     | py3—py4 -37.8 | py3—py4 -27.6  | py3—py4 -23.8                           | py3—py4 -27.46 |
|       | py4—cp1 -10.1 | py4—cp1 -14.1  | py4—cp1 -14.9                           | py4—cp1 -15.34 |
| 5     | py1—cp2 -54.0 | py1—cp2 -54.0  | py1—cp2 -53.3                           | py1—cp2 -53.03 |

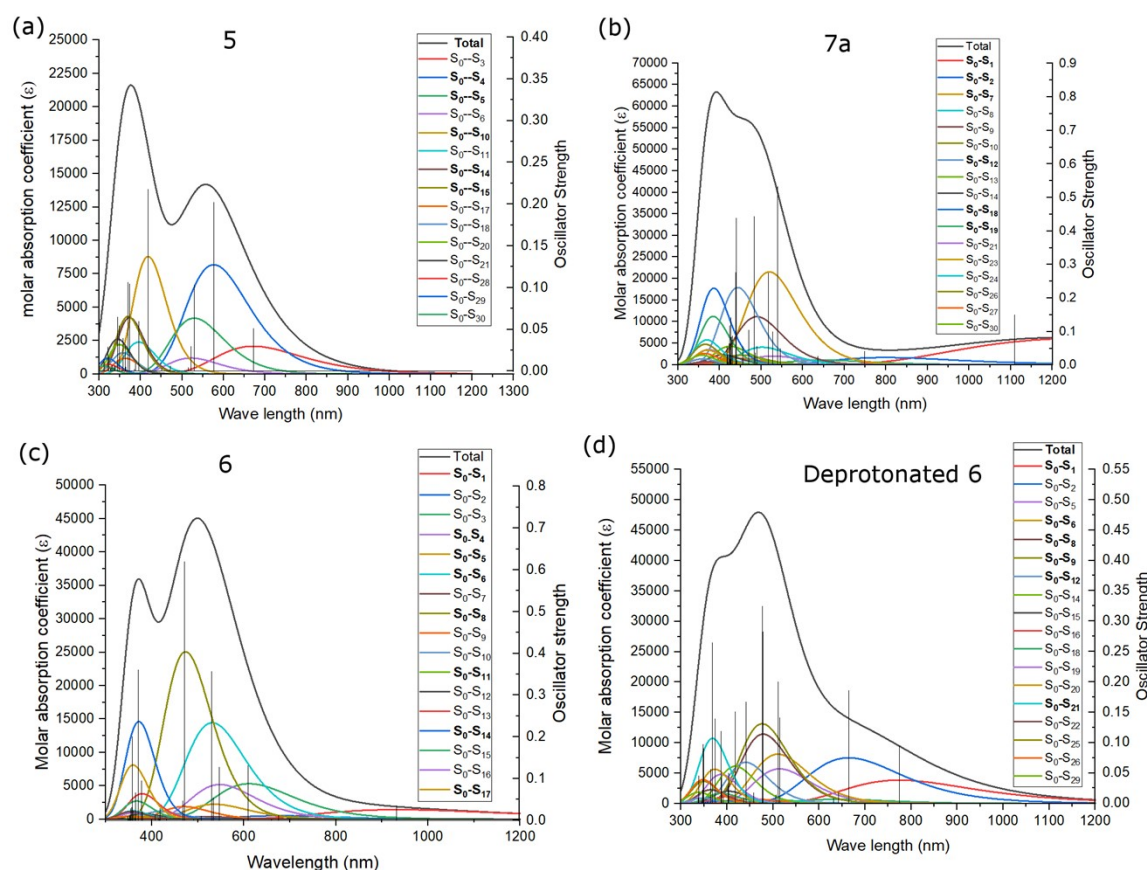

Fig. S53 Steady state absorption spectrum (total) and individual transitions that are predicted from TD-DFT calculation done with solvent (dichloromethane using a polarizable continuum model) and at uB3LYP/LanL2DZ (Fe) and 6-31G\*\* (for rest of the atoms) level of theory. (a) **5**, (b) **7a** (c) **6** (d) deprotonated **6**.



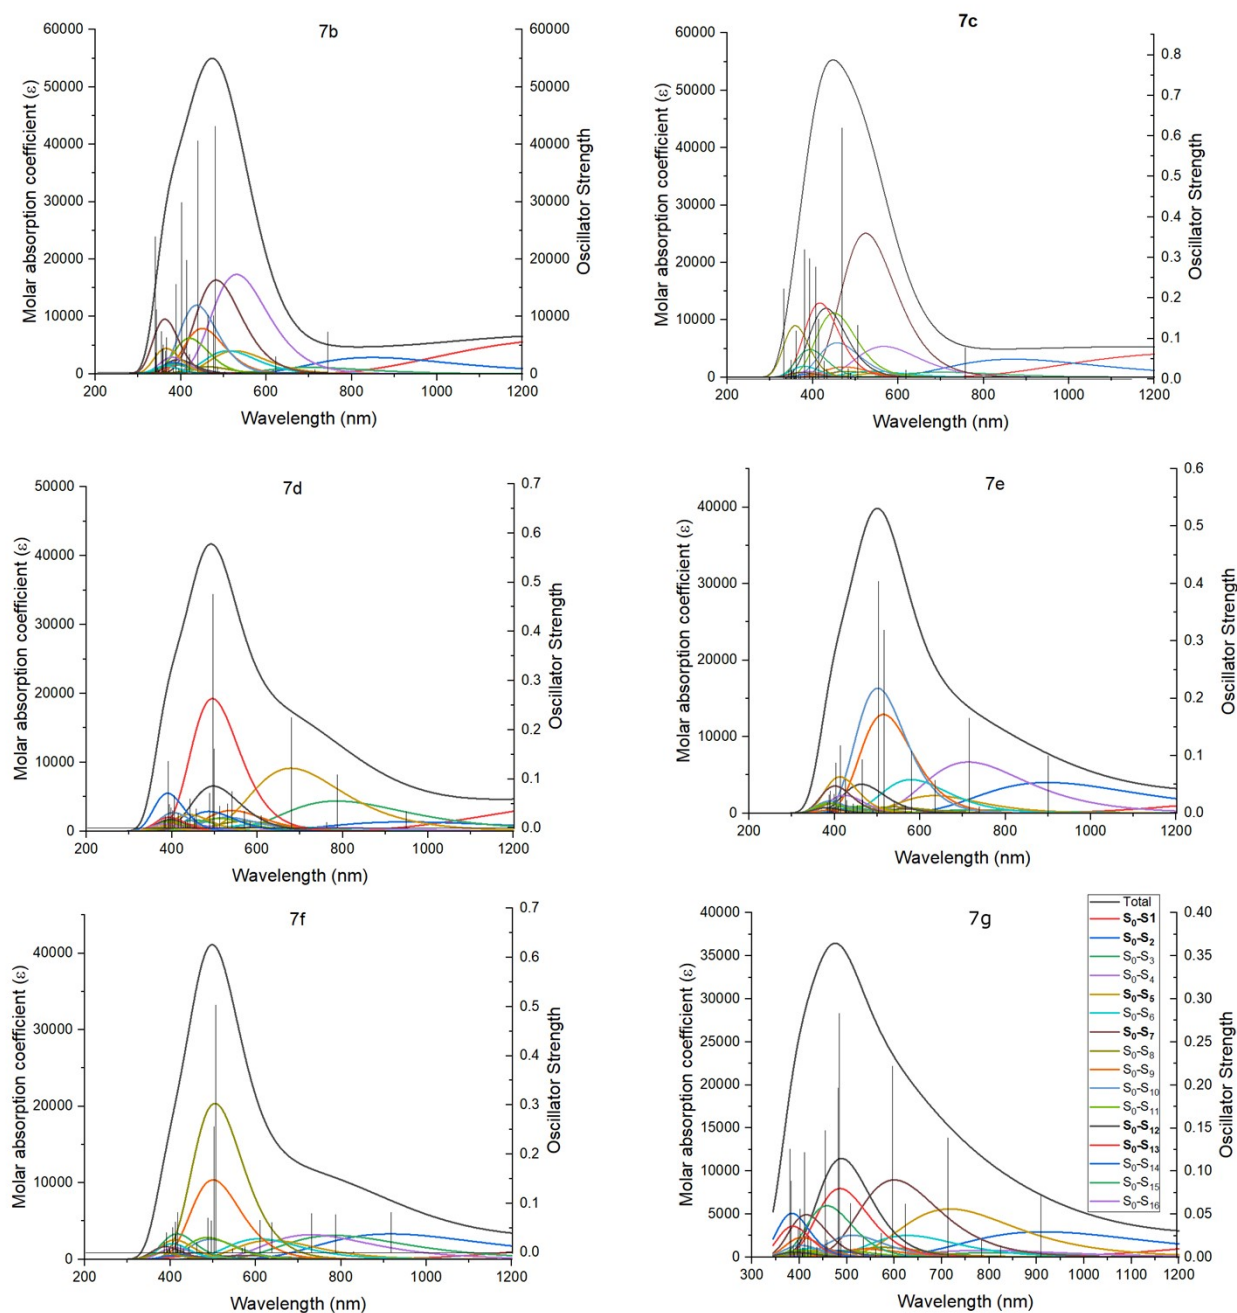

Fig. S54 Steady state absorption spectrum (total) and individual transitions of isomers of **7** (**7b-7g**) that are predicted from TD-DFT calculation done with solvent (dichloromethane using a polarizable continuum model) and at uB3LYP/LanL2DZ (Fe) and 6-31G\*\* (for rest of the atoms) level of theory.

Table S2: Summary of UV-vis spectral data of **5**

| No. | Energy (cm <sup>-1</sup> ) | Wavelength (nm) | Oscillator Strength | Symmetry         | Major contributions                                               |
|-----|----------------------------|-----------------|---------------------|------------------|-------------------------------------------------------------------|
| 2   | 14342.95                   | 697.20          | 0.0003              | Singlet-A        | H-2->LUMO (54%), H-2->L+4 (18%)                                   |
| 3   | 14884.96                   | 671.81          | 0.0515              | Singlet-A        | H-3->LUMO (25%), H-3->L+4 (14%), HOMO->LUMO (17%)                 |
| 4   | <b>17345.75</b>            | <b>576.50</b>   | <b>0.2023</b>       | <b>Singlet-A</b> | <b>H-1-&gt;LUMO (23%), HOMO-&gt;LUMO (68%)</b>                    |
| 5   | <b>18885.47</b>            | <b>529.50</b>   | <b>0.1035</b>       | <b>Singlet-A</b> | <b>H-2-&gt;L+3 (12%), H-1-&gt;LUMO (63%)</b>                      |
| 6   | 19179.86                   | 521.38          | 0.0296              | Singlet-A        | H-3->LUMO (19%), H-2->L+3 (26%)                                   |
| 7   | 19419.41                   | 514.94          | 0.0039              | Singlet-A        | H-3->L+3 (32%), H-2->LUMO (16%), H-1->L+3 (11%)                   |
| 8   | 21186.57                   | 471.99          | 0.0065              | Singlet-A        | H-3->LUMO (28%)                                                   |
| 9   | 22210.08                   | 450.24          | 0.0038              | Singlet-A        | H-10->L+3 (11%), H-2->LUMO (15%), H-2->L+4 (19%)                  |
| 10  | <b>23908.69</b>            | <b>418.25</b>   | <b>0.2175</b>       | <b>Singlet-A</b> | <b>H-4-&gt;LUMO (75%), HOMO-&gt;L+1 (11%)</b>                     |
| 11  | 25274.18                   | 395.66          | 0.0594              | Singlet-A        | H-7->LUMO (17%), H-6->LUMO (32%), H-5->LUMO (22%)                 |
| 12  | 25791.19                   | 387.72          | 0.0092              | Singlet-A        | H-7->LUMO (11%), H-6->LUMO (20%), H-5->LUMO (10%)                 |
| 13  | 25979.11                   | 384.92          | 0.0026              | Singlet-A        | H-9->LUMO (17%), H-8->LUMO (49%)                                  |
| 14  | <b>26759.86</b>            | <b>373.69</b>   | <b>0.1044</b>       | <b>Singlet-A</b> | <b>H-7-&gt;LUMO (15%), H-5-&gt;LUMO (17%), HOMO-&gt;L+1 (41%)</b> |
| 15  | <b>27040.54</b>            | <b>369.81</b>   | <b>0.1067</b>       | <b>Singlet-A</b> | <b>H-6-&gt;LUMO (20%), H-5-&gt;LUMO (13%), HOMO-&gt;L+1 (27%)</b> |
| 16  | 27444.62                   | 364.37          | 0.0046              | Singlet-A        | H-16->LUMO (46%), H-9->LUMO (27%), H-8->LUMO (13%)                |
| 17  | 27575.28                   | 362.64          | 0.0294              | Singlet-A        | H-16->LUMO (29%), H-9->LUMO (37%), H-8->LUMO (10%),               |
| 18  | 27978.56                   | 357.41          | 0.0394              | Singlet-A        | H-12->LUMO (11%), H-10->LUMO (13%), H-7->LUMO (27%)               |
| 19  | 28281.83                   | 353.58          | 0.0009              | Singlet-A        | H-10->L+3 (14%), H-5->L+3 (10%), H-2->L+1 (20%)                   |
| 20  | 28672.20                   | 348.76          | 0.0547              | Singlet-A        | H-1->L+1 (75%)                                                    |
| 21  | 29000.47                   | 344.82          | 0.0648              | Singlet-A        | H-14->LUMO (73%)                                                  |
| 22  | 29646.52                   | 337.30          | 0.0064              | Singlet-A        | H-14->LUMO (73%)                                                  |
| 23  | 29815.89                   | 335.39          | 0.005               | Singlet-A        | H-13->LUMO (13%), H-12->LUMO (47%), H-10->LUMO (12%)              |
| 24  | 30220.78                   | 330.89          | 0.0071              | Singlet-A        | H-15->LUMO (10%), H-10->LUMO (19%), H-3->L+1 (27%)                |
| 25  | 30398.22                   | 328.96          | 0.0012              | Singlet-A        | H-15->LUMO (69%)                                                  |
| 26  | 30449.84                   | 328.40          | 0.0036              | Singlet-A        | H-12->LUMO (10%), H-11->LUMO (27%), H-10->LUMO (11%)              |
| 27  | 30486.95                   | 328.00          | 0.0032              | Singlet-A        | H-13->LUMO (63%), H-12->LUMO (13%)                                |
| 28  | 30908.77                   | 323.53          | 0.0176              | Singlet-A        | H-11->LUMO (22%), H-3->L+1 (19%), H-2->L+1 (22%)                  |
| 29  | 31194.29                   | 320.57          | 0.0289              | Singlet-A        | H-11->LUMO (11%), H-3->L+1 (25%)                                  |
| 30  | 32112.15                   | 311.40          | 0.0151              | Singlet-A        | H-19->LUMO (69%)                                                  |



Table S3: Summary of UV-vis spectral data of **6**

| No. | Energy (cm <sup>-1</sup> ) | Wavelength (nm) | Oscillator Strength | Symmetry         | Major contributions                                                  |
|-----|----------------------------|-----------------|---------------------|------------------|----------------------------------------------------------------------|
| 1   | 10717.49                   | 933.05          | 0.0357              | Singlet-A        | HOMO->LUMO (98%)                                                     |
| 2   | 14777.69                   | 676.69          | 0.0133              | Singlet-A        | H-3->L+8 (10%), H-2->LUMO (20%), H-2->L+1 (11%), H-                  |
| 3   | 15109.18                   | 661.84          | 0.0039              | Singlet-A        | H-3->LUMO (19%), H-3->L+1 (11%), H-3->L+5 (10%), H-                  |
| 4   | <b>16350.47</b>            | <b>611.60</b>   | <b>0.1317</b>       | <b>Singlet-A</b> | <b>H-1-&gt;LUMO (68%), HOMO-&gt;L+1 (12%)</b>                        |
| 5   | <b>18248.29</b>            | <b>547.99</b>   | <b>0.1285</b>       | <b>Singlet-A</b> | <b>H-2-&gt;LUMO (61%), HOMO-&gt;L+1 (14%)</b>                        |
| 6   | 18653.99                   | 536.07          | 0.0555              | Singlet-A        | H-3->LUMO (60%), H-2->L+8 (16%)                                      |
| 7   | <b>18816.10</b>            | <b>531.45</b>   | <b>0.3572</b>       | <b>Singlet-A</b> | <b>H-1-&gt;LUMO (11%), HOMO-&gt;L+1 (41%), HOMO-&gt;L+2 (12%)</b>    |
| 8   | 19635.56                   | 509.27          | 0.0106              | Singlet-A        | H-3->L+8 (21%)                                                       |
| 9   | 20269.51                   | 493.35          | 0.0022              | Singlet-A        | H-3->L+1 (14%), H-2->L+8 (20%)                                       |
| 10  | <b>21120.43</b>            | <b>473.47</b>   | <b>0.6196</b>       | <b>Singlet-A</b> | <b>HOMO-&gt;L+1 (11%), HOMO-&gt;L+2 (67%)</b>                        |
| 11  | 21277.71                   | 469.97          | 0.0469              | Singlet-A        | H-1->L+1 (93%)                                                       |
| 12  | 23050.51                   | 433.82          | 0.0017              | Singlet-A        | H-2->L+1 (61%)                                                       |
| 13  | 23840.13                   | 419.46          | 0.0289              | Singlet-A        | H-6->LUMO (55%), H-5->LUMO (11%), H-4->LUMO (27%)                    |
| 14  | 23886.91                   | 418.63          | 0.0011              | Singlet-A        | H-3->L+1 (57%)                                                       |
| 15  | 24019.99                   | 416.31          | 0.0055              | Singlet-A        | H-7->LUMO (34%), H-5->LUMO (50%)                                     |
| 16  | 24466.82                   | 408.71          | 0.0136              | Singlet-A        | H-4->LUMO (31%), H-1->L+2 (49%)                                      |
| 17  | 24897.52                   | 401.64          | 0.0034              | Singlet-A        | H-7->LUMO (45%), H-5->LUMO (17%), H-4->LUMO (13%)                    |
| 18  | 26175.91                   | 382.03          | 0.0206              | Singlet-A        | H-8->LUMO (55%)                                                      |
| 19  | 26359.81                   | 379.36          | 0.0948              | Singlet-A        | H-9->LUMO (40%)                                                      |
| 20  | <b>26868.74</b>            | <b>372.17</b>   | <b>0.3614</b>       | <b>Singlet-A</b> | <b>H-6-&gt;LUMO (17%), H-4-&gt;LUMO (11%), H-2-&gt;L+2 (13%),</b>    |
| 21  | 27222.01                   | 367.34          | 0.0674              | Singlet-A        | H-12->LUMO (12%), H-9->LUMO (32%), H-2->L+2 (10%)                    |
| 22  | 27317.99                   | 366.05          | 0.0069              | Singlet-A        | H-13->LUMO (12%), H-12->LUMO (13%), H-3->L+2 (18%),                  |
| 23  | 27643.84                   | 361.74          | 0.0239              | Singlet-A        | H-13->LUMO (21%), H-9->LUMO (11%), H-8->LUMO (18%),                  |
| 24  | <b>27809.99</b>            | <b>359.58</b>   | <b>0.2007</b>       | <b>Singlet-A</b> | <b>H-14-&gt;LUMO (16%), H-13-&gt;LUMO (12%), H-11-&gt;LUMO (11%)</b> |
| 25  | 27906.78                   | 358.33          | 0.0311              | Singlet-A        | H-14->LUMO (12%), H-13->LUMO (13%), H-12->LUMO (13%)                 |
| 26  | 28092.29                   | 355.96          | 0.0285              | Singlet-A        | H-13->LUMO (16%), H-11->LUMO (71%)                                   |
| 27  | 28168.91                   | 355.00          | 0.012               | Singlet-A        | H-15->LUMO (20%), H-14->LUMO (35%)                                   |
| 28  | 28251.98                   | 353.95          | 0.0099              | Singlet-A        | H-15->LUMO (34%), H-12->LUMO (28%), H-10->LUMO (23%)                 |
| 29  | 28471.37                   | 351.23          | 0.0015              | Singlet-A        | H-16->LUMO (90%)                                                     |
| 30  | 28549.60                   | 350.26          | 0.0107              | Singlet-A        | H-15->LUMO (33%), H-14->LUMO (18%), H-10->LUMO (24%)                 |

Table S4: Summary of UV-vis spectral data of deprotonated **6** [6]<sup>-1</sup>

| No. | Energy (cm <sup>-1</sup> ) | Wavelength (nm) | Oscillator Strength | Symmetry         | Major contributions                                               |
|-----|----------------------------|-----------------|---------------------|------------------|-------------------------------------------------------------------|
| 1   | 12920.19                   | 773.98          | 0.095               | Singlet-A        | HOMO->LUMO (91%)                                                  |
| 2   | <b>15047.07</b>            | <b>664.58</b>   | <b>0.1861</b>       | <b>Singlet-A</b> | <b>H-1-&gt;LUMO (80%)</b>                                         |
| 3   | 15567.30                   | 642.37          | 0.0171              | Singlet-A        | H-3->L+6 (12%), H-2->LUMO (15%)                                   |
| 4   | 15826.21                   | 631.86          | 0.0078              | Singlet-A        | H-3->LUMO (10%), H-2->L+6 (15%)                                   |
| 5   | 19442.80                   | 514.32          | 0.141               | <b>Singlet-A</b> | H-3->L+6 (23%), H-2->LUMO (10%), HOMO->L+1 (14%)                  |
| 6   | <b>19579.91</b>            | <b>510.72</b>   | <b>0.2006</b>       | <b>Singlet-A</b> | <b>H-1-&gt;L+1 (25%), HOMO-&gt;L+1 (56%)</b>                      |
| 7   | 19748.48                   | 506.36          | 0.0135              | Singlet-A        | H-3->LUMO (15%), H-2->L+6 (27%)                                   |
| 8   | <b>20888.14</b>            | <b>478.74</b>   | <b>0.2826</b>       | <b>Singlet-A</b> | <b>H-4-&gt;LUMO (21%), H-3-&gt;LUMO (16%), H-2-&gt;LUMO (13%)</b> |
| 9   | <b>20980.90</b>            | <b>476.62</b>   | <b>0.3244</b>       | <b>Singlet-A</b> | <b>H-4-&gt;LUMO (34%), H-1-&gt;L+1 (34%), HOMO-&gt;L+1 (10%)</b>  |
| 10  | 21840.68                   | 457.86          | 0.0179              | Singlet-A        | H-4->LUMO (25%), H-2->LUMO (31%)                                  |
| 11  | 22217.34                   | 450.09          | 0.0035              | Singlet-A        | H-3->LUMO (38%), H-2->LUMO (14%)                                  |
| 12  | <b>22669.82</b>            | <b>441.11</b>   | <b>0.1675</b>       | <b>Singlet-A</b> | <b>HOMO-&gt;L+2 (62%)</b>                                         |
| 13  | 22882.75                   | 437.01          | 0.0094              | Singlet-A        | H-6->LUMO (17%), H-5->LUMO (64%)                                  |
| 14  | 23906.27                   | 418.30          | 0.1515              | Singlet-A        | H-1->L+2 (79%)                                                    |
| 15  | 24766.06                   | 403.77          | 0.0498              | Singlet-A        | H-8->LUMO (74%)                                                   |
| 16  | 24826.55                   | 402.79          | 0.0283              | Singlet-A        | H-7->LUMO (26%), H-6->LUMO (36%), H-5->LUMO (28%)                 |
| 17  | 25480.66                   | 392.45          | 0.0102              | Singlet-A        | H-9->LUMO (11%), H-2->L+1 (59%)                                   |
| 18  | 25748.44                   | 388.37          | 0.0413              | Singlet-A        | H-4->L+1 (18%), H-3->L+1 (38%)                                    |
| 19  | 25812.16                   | 387.41          | 0.1185              | Singlet-A        | H-7->LUMO (23%), H-4->L+1 (26%), H-3->L+1 (26%)                   |
| 20  | 26738.08                   | 373.99          | 0.1395              | Singlet-A        | H-9->LUMO (46%), H-3->L+1 (15%), H-2->L+1 (13%)                   |
| 21  | <b>27112.32</b>            | <b>368.83</b>   | <b>0.2647</b>       | <b>Singlet-A</b> | <b>H-7-&gt;LUMO (15%), H-4-&gt;L+1 (41%)</b>                      |
| 22  | 27424.46                   | 364.63          | 0.0557              | Singlet-A        | H-10->LUMO (20%), H-9->LUMO (15%)                                 |
| 23  | 27929.36                   | 358.04          | 0.0023              | Singlet-A        | HOMO->L+6 (13%)                                                   |
| 24  | 28279.41                   | 353.61          | 0.0014              | Singlet-A        | H-11->LUMO (35%), H-10->LUMO (50%)                                |
| 25  | 28586.70                   | 349.81          | 0.0902              | Singlet-A        | H-14->LUMO (10%), H-12->LUMO (18%)                                |
| 26  | 28702.04                   | 348.40          | 0.0969              | Singlet-A        | HOMO->L+3 (76%)                                                   |
| 27  | 28830.28                   | 346.85          | 0.0221              | Singlet-A        | H-11->LUMO (11%), H-4->L+2 (44%)                                  |
| 28  | 29027.08                   | 344.50          | 0.0042              | Singlet-A        | H-6->L+1 (17%), H-5->L+1 (53%)                                    |
| 29  | 29481.98                   | 339.19          | 0.0456              | Singlet-A        | HOMO->L+4 (62%), HOMO->L+5 (16%)                                  |
| 30  | 29614.25                   | 337.67          | 0.0086              | Singlet-A        | HOMO->L+5 (65%)                                                   |

Table S5: Summary of UV-vis spectral data of **7a**

| No. | Energy (cm <sup>-1</sup> ) | Wavelength (nm) | Oscillator Strength | Symmetry         | Major contributions                                                  |
|-----|----------------------------|-----------------|---------------------|------------------|----------------------------------------------------------------------|
| 1   | <b>7817.125</b>            | <b>1279.2</b>   | <b>0.1511</b>       | <b>Singlet-A</b> | <b>HOMO-&gt;LUMO (100%)</b>                                          |
| 2   | 12533.04                   | 797.89          | 0.0414              | Singlet-A        | H-3->LUMO (12%), H-2->LUMO (11%), H-1->LUMO (45%)                    |
| 3   | 12601.60                   | 793.54          | 0.0036              | Singlet-A        | H-3->LUMO (14%), H-2->LUMO (49%), H-2->L+4 (10%)                     |
| 4   | 15442.29                   | 647.57          | 0.026               | Singlet-A        | H-3->LUMO (30%), H-1->LUMO (31%), HOMO->L+1 (17%)                    |
| 5   | 18149.08                   | 550.99          | 0.0024              | Singlet-A        | H-9->LUMO (17%), H-9->L+4 (10%), H-2->L+3 (25%)                      |
| 6   | 18950.80                   | 527.68          | 0.0497              | Singlet-A        | H-3->L+3 (31%), H-2->LUMO (10%), H-1->L+3 (15%)                      |
| 7   | <b>19241.96</b>            | <b>519.69</b>   | <b>0.5325</b>       | <b>Singlet-A</b> | <b>HOMO-&gt;L+1 (53%), HOMO-&gt;L+2 (15%)</b>                        |
| 8   | 19907.37                   | 502.32          | 0.1005              | Singlet-A        | H-3->LUMO (20%), HOMO->L+2 (35%)                                     |
| 9   | 20417.92                   | 489.76          | 0.2757              | Singlet-A        | HOMO->L+1 (12%), HOMO->L+2 (30%)                                     |
| 10  | 22077.00                   | 452.95          | 0.0555              | Singlet-A        | H-4->LUMO (26%), H-2->L+4 (11%), H-1->L+1 (11%)                      |
| 11  | 22331.87                   | 447.79          | 0.037               | Singlet-A        | H-4->LUMO (34%), H-2->L+4 (10%)                                      |
| 12  | <b>22528.67</b>            | <b>443.87</b>   | <b>0.4429</b>       | <b>Singlet-A</b> | <b>H-5-&gt;LUMO (72%)</b>                                            |
| 13  | 23484.44                   | 425.81          | 0.1055              | Singlet-A        | H-7->LUMO (31%), H-1->L+1 (55%)                                      |
| 14  | 24513.60                   | 407.93          | 0.0562              | Singlet-A        | H-9->LUMO (23%), H-2->L+3 (14%), H-1->L+2 (28%)                      |
| 15  | 25634.71                   | 390.09          | 0.001               | Singlet-A        | H-6->LUMO (74%)                                                      |
| 16  | 25687.95                   | 389.28          | 0.0034              | Singlet-A        | H-8->LUMO (88%), H-7->LUMO (10%)                                     |
| 17  | 25766.99                   | 388.09          | 0.014               | Singlet-A        | HOMO->L+3 (87%)                                                      |
| 18  | <b>25900.07</b>            | <b>386.09</b>   | <b>0.439</b>        | <b>Singlet-A</b> | <b>H-16-&gt;LUMO (10%), H-11-&gt;LUMO (16%), H-7-&gt;LUMO (19%)</b>  |
| 19  | <b>26008.15</b>            | <b>384.49</b>   | <b>0.2771</b>       | <b>Singlet-A</b> | <b>H-16-&gt;LUMO (11%), H-12-&gt;LUMO (12%), H-10-&gt;LUMO (13%)</b> |
| 20  | 26243.66                   | 381.04          | 0.0032              | Singlet-A        | H-17->LUMO (21%), H-15->LUMO (13%), H-10->LUMO (18%)                 |
| 21  | 26738.89                   | 373.98          | 0.0864              | Singlet-A        | H-13->LUMO (30%), H-12->LUMO (13%),                                  |
| 22  | 26855.03                   | 372.36          | 0.0024              | Singlet-A        | H-12->LUMO (16%), H-2->L+1 (58%)                                     |
| 23  | 26939.72                   | 371.19          | 0.0838              | Singlet-A        | H-11->LUMO (25%), HOMO->L+4 (34%)                                    |
| 24  | 27056.67                   | 369.59          | 0.1426              | Singlet-A        | H-11->LUMO (13%), H-3->L+1 (14%), H                                  |
| 25  | 27172.01                   | 368.02          | 0.0171              | Singlet-A        | H-17->LUMO (12%), H-16->LUMO (17%),                                  |
| 26  | 27362.35                   | 365.46          | 0.1169              | Singlet-A        | H-3->L+1 (23%), H-1->L+2 (31%)                                       |
| 27  | 27476.88                   | 363.94          | 0.0645              | Singlet-A        | H-14->LUMO (51%), H-10->LUMO (25%)                                   |
| 28  | 27768.86                   | 360.11          | 0.0094              | Singlet-A        | H-15->LUMO (37%), H-10->LUMO (12%)                                   |
| 29  | 27864.84                   | 358.87          | 0.0326              | Singlet-A        | H-20->LUMO (13%), H-15->LUMO (10%),                                  |
| 30  | 27985.82                   | 357.32          | 0.0546              | Singlet-A        | H-20->LUMO (17%), H-3->L+1 (25%),                                    |

Table S6: Summary of UV-vis spectral data of **7b**

| No. | Energy (cm <sup>-1</sup> ) | Wavelength (nm) | Oscillator Strength | Symmetry         | Major contributions                                               |
|-----|----------------------------|-----------------|---------------------|------------------|-------------------------------------------------------------------|
| 1   | <b>7238.826</b>            | <b>1381.44</b>  | <b>0.1542</b>       | <b>Singlet-A</b> | <b>HOMO-&gt;LUMO (100%)</b>                                       |
| 2   | 11785.37                   | 848.50          | 0.071               | Singlet-A        | H-2->LUMO (13%), H-1->LUMO (61%)                                  |
| 3   | 12323.34                   | 811.46          | 0.0046              | Singlet-A        | H-3->LUMO (65%), H-3->L+2 (10%), H-3->L+4 (14%)                   |
| 4   | 14264.72                   | 701.03          | 0.0282              | Singlet-A        | H-2->LUMO (46%), H-1->LUMO (25%)                                  |
| 5   | 17916.80                   | 558.13          | 0.001               | Singlet-A        | H-9->LUMO (13%), H-3->L+3 (28%)                                   |
| 6   | 18594.30                   | 537.79          | 0.0078              | Singlet-A        | H-3->LUMO (15%), H-2->L+3 (34%), H-1->L+3 (12%),                  |
| 7   | <b>18837.88</b>            | <b>530.84</b>   | <b>0.4287</b>       | <b>Singlet-A</b> | <b>H-2-&gt;LUMO (13%), HOMO-&gt;L+1 (59%)</b>                     |
| 8   | 18969.35                   | 527.16          | 0.0995              | Singlet-A        | H-2->L+3 (10%), HOMO->L+2 (63%)                                   |
| 9   | 19581.52                   | 510.68          | 0.0997              | Singlet-A        | H-3->L+3 (17%), H-2->LUMO (20%), HOMO->L+1 (12%)                  |
| 10  | <b>20712.31</b>            | <b>482.80</b>   | <b>0.4039</b>       | <b>Singlet-A</b> | <b>H-4-&gt;LUMO (61%), HOMO-&gt;L+2 (11%)</b>                     |
| 11  | 21765.67                   | 459.43          | 0.0314              | Singlet-A        | H-9->L+3 (11%), H-3->LUMO (15%), H-3->L+2 (14%),                  |
| 12  | <b>22206.05</b>            | <b>450.32</b>   | <b>0.1961</b>       | <b>Singlet-A</b> | <b>H-5-&gt;LUMO (58%), H-1-&gt;L+1 (20%)</b>                      |
| 13  | <b>22866.62</b>            | <b>437.31</b>   | <b>0.2961</b>       | <b>Singlet-A</b> | <b>H-5-&gt;LUMO (16%), H-1-&gt;L+1 (62%)</b>                      |
| 14  | 23342.49                   | 428.40          | 0.0078              | Singlet-A        | H-8->LUMO (21%), H-6->LUMO (56%)                                  |
| 15  | <b>23772.38</b>            | <b>420.65</b>   | <b>0.1534</b>       | <b>Singlet-A</b> | <b>H-9-&gt;LUMO (14%), H-3-&gt;L+3 (13%), H-1-&gt;L+2 (41%)</b>   |
| 16  | 24175.66                   | 413.63          | 0.0083              | Singlet-A        | H-14->LUMO (12%), H-8->LUMO (26%), H-6->LUMO (36%)                |
| 17  | 24970.92                   | 400.46          | 0.0051              | Singlet-A        | H-7->LUMO (93%)                                                   |
| 18  | 25405.65                   | 393.61          | 0.0609              | Singlet-A        | H-14->LUMO (10%), H-12->LUMO (15%), H-8->LUMO (26%)               |
| 19  | 25517.76                   | 391.88          | 0.0375              | Singlet-A        | H-9->LUMO (34%), H-1->L+2 (22%)                                   |
| 20  | 25727.47                   | 388.68          | 0.0052              | Singlet-A        | H-16->LUMO (23%), H-11->LUMO (14%), HOMO->L+3 (14%)               |
| 21  | 26017.02                   | 384.36          | 0.0483              | Singlet-A        | H-14->LUMO (10%), H-12->LUMO (14%), H-11->LUMO (13%), H           |
| 22  | 26063.80                   | 383.67          | 0.0413              | Singlet-A        | H-14->LUMO (11%), H-12->LUMO (34%), HOMO->L+3 (30%)               |
| 23  | 26290.44                   | 380.36          | 0.0712              | Singlet-A        | H-11->LUMO (35%), H-10->LUMO (37%)                                |
| 24  | 26734.85                   | 374.04          | 0.0038              | Singlet-A        | H-3->L+1 (88%)                                                    |
| 25  | 26851.00                   | 372.42          | 0.0029              | Singlet-A        | H-13->LUMO (39%), H-2->L+1 (29%), HOMO->L+4 (13%)                 |
| 26  | 26902.62                   | 371.71          | 0.0041              | Singlet-A        | H-13->LUMO (42%), H-2->L+1 (33%), HOMO->L+4 (16%)                 |
| 27  | 27125.23                   | 368.66          | 0.0083              | Singlet-A        | H-16->LUMO (35%), H-14->LUMO (17%), H-11->LUMO (14%)              |
| 28  | 27342.19                   | 365.73          | 0.1097              | Singlet-A        | H-20->LUMO (10%), H-17->LUMO (10%), HOMO->L+4 (22%)               |
| 29  | 27428.49                   | 364.58          | 0.0341              | Singlet-A        | H-20->LUMO (11%), H-17->LUMO (12%), H-15->LUMO (13%)              |
| 30  | <b>27566.41</b>            | <b>362.76</b>   | <b>0.2361</b>       | <b>Singlet-A</b> | <b>H-15-&gt;LUMO (13%), H-2-&gt;L+1 (16%), HOMO-&gt;L+4 (33%)</b> |

Table S7: Summary of UV-vis spectral data of **7c**

| No. | Energy (cm <sup>-1</sup> ) | Wavelength (nm) | Oscillator Strength | Symmetry         | Major contributions                                                  |
|-----|----------------------------|-----------------|---------------------|------------------|----------------------------------------------------------------------|
| 1   | <b>7476.759</b>            | <b>1337.4</b>   | <b>0.1067</b>       | <b>Singlet-A</b> | <b>HOMO-&gt;LUMO (100%)</b>                                          |
| 2   | 11497.43                   | 869.75          | 0.0778              | Singlet-A        | H-1->LUMO (75%)                                                      |
| 3   | 12744.36                   | 784.66          | 0.0051              | Singlet-A        | H-2->LUMO (54%), H-2->L+3 (12%)                                      |
| 4   | 14219.55                   | 703.25          | 0.022               | Singlet-A        | H-3->LUMO (39%), H-1->LUMO (20%)                                     |
| 5   | 17647.41                   | 566.65          | 0.133               | Singlet-A        | HOMO->L+1 (57%), HOMO->L+2 (30%)                                     |
| 6   | 18216.83                   | 548.94          | 0.0029              | Singlet-A        | H-3->LUMO (10%), H-2->L+4 (29%)                                      |
| 7   | 18290.23                   | 546.73          | 0.0149              | Singlet-A        | H-3->L+4 (25%), H-2->LUMO (16%), H-1->L+4 (11%)                      |
| 8   | 18493.48                   | 540.73          | 0.0259              | Singlet-A        | H-3->LUMO (23%)                                                      |
| 9   | <b>19081.46</b>            | <b>524.06</b>   | <b>0.6204</b>       | <b>Singlet-A</b> | <b>HOMO-&gt;L+1 (32%), HOMO-&gt;L+2 (57%)</b>                        |
| 10  | 20804.26                   | 480.67          | 0.0256              | Singlet-A        | H-2->L+3 (12%), H-1->L+1 (14%), H-1->L+2 (10%)                       |
| 11  | 21140.59                   | 473.02          | 0.0448              | Singlet-A        | H-4->LUMO (12%), H-1->L+1 (27%), H-1->L+2 (27%)                      |
| 12  | 21864.88                   | 457.35          | 0.1487              | Singlet-A        | H-8->LUMO (24%), H-4->LUMO (46%), H-1->L+1 (13%)                     |
| 13  | <b>22226.22</b>            | <b>449.91</b>   | <b>0.2772</b>       | <b>Singlet-A</b> | <b>H-5-&gt;LUMO (22%), H-2-&gt;L+4 (10%), H-1-&gt;L+1 (18%),</b>     |
| 14  | <b>23181.98</b>            | <b>431.36</b>   | <b>0.2974</b>       | <b>Singlet-A</b> | <b>H-8-&gt;LUMO (26%), H-5-&gt;LUMO (18%), H-4-&gt;LUMO (14%)</b>    |
| 15  | <b>23977.25</b>            | <b>417.06</b>   | <b>0.3204</b>       | <b>Singlet-A</b> | <b>H-8-&gt;LUMO (11%), H-5-&gt;LUMO (17%), H-3-&gt;L+2 (10%)</b>     |
| 16  | 24599.10                   | 406.51          | 0.0083              | Singlet-A        | H-17->LUMO (15%), H-14->LUMO (11%), H-9->LUMO (16%)                  |
| 17  | 24853.16                   | 402.36          | 0.0152              | Singlet-A        | H-6->LUMO (91%)                                                      |
| 18  | 25360.49                   | 394.31          | 0.1193              | Singlet-A        | H-17->LUMO (18%), H-16->LUMO (10%), H-9->LUMO (30%)                  |
| 19  | 25432.27                   | 393.20          | 0.0092              | Singlet-A        | H-7->LUMO (88%)                                                      |
| 20  | 25708.92                   | 388.97          | 0.0076              | Singlet-A        | H-2->L+1 (49%), H-2->L+2 (29%)                                       |
| 21  | 25837.97                   | 387.02          | 0.0244              | Singlet-A        | H-17->LUMO (10%), H-15->LUMO (15%), H-10->LUMO (31%),                |
| 22  | 26264.63                   | 380.74          | 0.0212              | Singlet-A        | H-3->L+1 (34%), H-3->L+2 (22%), H-2->L+2 (16%)                       |
| 23  | 26324.32                   | 379.87          | 0.0472              | Singlet-A        | H-17->LUMO (11%), H-15->LUMO (16%), H-14->LUMO (25%),                |
| 24  | 26406.59                   | 378.69          | 0.0044              | Singlet-A        | H-3->L+2 (18%), H-2->L+1 (11%), H-2->L+2 (13%), H-1->                |
| 25  | 26770.34                   | 373.54          | 0.0206              | Singlet-A        | H-12->LUMO (12%), H-11->LUMO (68%)                                   |
| 26  | 27148.62                   | 368.34          | 0.0062              | Singlet-A        | H-10->LUMO (14%), H-3->L+1 (10%), H-3->L+2 (15%), H-1                |
| 27  | 27347.84                   | 365.65          | 0.0022              | Singlet-A        | H-13->LUMO (16%), HOMO->L+4 (51%)                                    |
| 28  | 27403.49                   | 364.91          | 0.0043              | Singlet-A        | H-13->LUMO (48%), H-12->LUMO (17%), HOMO->L+4 (14%)                  |
| 29  | 27503.50                   | 363.59          | 0.0056              | Singlet-A        | H-15->LUMO (30%), H-14->LUMO (26%), H-10->LUMO (12%),                |
| 30  | <b>27834.19</b>            | <b>359.27</b>   | <b>0.2224</b>       | <b>Singlet-A</b> | <b>H-21-&gt;LUMO (32%), H-18-&gt;LUMO (10%), H-12-&gt;LUMO (14%)</b> |

Table S8: Summary of UV-vis spectral data of **7d**

| No. | Energy (cm <sup>-1</sup> ) | Wavelength (nm) | Oscillator Strength | Symmetry         | Major contributions                                              |
|-----|----------------------------|-----------------|---------------------|------------------|------------------------------------------------------------------|
| 1   | <b>5802.352</b>            | <b>1723.43</b>  | <b>0.1322</b>       | <b>Singlet-A</b> | <b>HOMO-&gt;LUMO (100%)</b>                                      |
| 2   | 10554.57                   | 947.45          | 0.0334              | Singlet-A        | H-1->LUMO (75%)                                                  |
| 3   | 12720.16                   | 786.15          | 0.1084              | Singlet-A        | H-2->LUMO (54%), H-2->L+3 (12%)                                  |
| 4   | 13145.22                   | 760.73          | 0.0127              | Singlet-A        | H-3->LUMO (39%), H-1->LUMO (20%)                                 |
| 5   | <b>14729.29</b>            | <b>678.91</b>   | <b>0.2259</b>       | <b>Singlet-A</b> | <b>HOMO-&gt;L+1 (57%), HOMO-&gt;L+2 (30%)</b>                    |
| 6   | 16459.35                   | 607.55          | 0.0253              | Singlet-A        | H-3->LUMO (10%), H-2->L+4 (29%)                                  |
| 7   | 17187.67                   | 581.81          | 0.0137              | Singlet-A        | H-3->L+4 (25%), H-2->LUMO (16%), H-1->L+4 (11%)                  |
| 8   | 17610.30                   | 567.84          | 0.0352              | Singlet-A        | H-3->LUMO (23%)                                                  |
| 9   | 18519.29                   | 539.97          | 0.0744              | Singlet-A        | HOMO->L+1 (32%), HOMO->L+2 (57%)                                 |
| 10  | 18907.24                   | 528.89          | 0.0497              | Singlet-A        | H-2->L+3 (12%), H-1->L+1 (14%), H-1->L+2 (10%)                   |
| 11  | 19606.53                   | 510.03          | 0.0458              | Singlet-A        | H-4->LUMO (12%), H-1->L+1 (27%), H-1->L+2 (27%)                  |
| 12  | 20113.04                   | 497.18          | 0.1619              | Singlet-A        | H-8->LUMO (24%), H-4->LUMO (46%), H-1->L+1 (13%)                 |
| 13  | <b>20198.54</b>            | <b>495.08</b>   | <b>0.4759</b>       | <b>Singlet-A</b> | <b>H-5-&gt;LUMO (22%), H-2-&gt;L+4 (10%), H-1-&gt;L+1 (18%),</b> |
| 14  | 20543.74                   | 486.76          | 0.0709              | Singlet-A        | H-8->LUMO (26%), H-5->LUMO (18%), H-4->LUMO (14%)                |
| 15  | 21981.83                   | 454.92          | 0.0398              | Singlet-A        | H-8->LUMO (11%), H-5->LUMO (17%), H-3->L+2 (10%)                 |
| 16  | 22146.37                   | 451.54          | 0.0223              | Singlet-A        | H-17->LUMO (15%), H-14->LUMO (11%), H-9->LUMO (16%)              |
| 17  | 22683.53                   | 440.84          | 0.06                | Singlet-A        | H-6->LUMO (91%)                                                  |
| 18  | 22945.66                   | 435.81          | 0.0146              | Singlet-A        | H-17->LUMO (18%), H-16->LUMO (10%), H-9->LUMO (30%)              |
| 19  | 23247.31                   | 430.15          | 0.0132              | Singlet-A        | H-7->LUMO (88%)                                                  |
| 20  | 23515.09                   | 425.25          | 0.0023              | Singlet-A        | H-2->L+1 (49%), H-2->L+2 (29%)                                   |
| 21  | 23807.06                   | 420.04          | 0.022               | Singlet-A        | H-17->LUMO (10%), H-15->LUMO (15%), H-10->LUMO (31%),            |
| 22  | 24165.98                   | 413.80          | 0.0304              | Singlet-A        | H-3->L+1 (34%), H-3->L+2 (22%), H-2->L+2 (16%)                   |
| 23  | 24749.12                   | 404.05          | 0.0665              | Singlet-A        | H-17->LUMO (11%), H-15->LUMO (16%), H-14->LUMO (25%),            |
| 24  | 25012.05                   | 399.80          | 0.0362              | Singlet-A        | H-3->L+2 (18%), H-2->L+1 (11%), H-2->L+2 (13%), H-1->            |
| 25  | 25206.43                   | 396.72          | 0.0417              | Singlet-A        | H-12->LUMO (12%), H-11->LUMO (68%)                               |
| 26  | 25440.33                   | 393.07          | 0.0494              | Singlet-A        | H-10->LUMO (14%), H-3->L+1 (10%), H-3->L+2 (15%), H-1            |
| 27  | 25629.07                   | 390.18          | 0.136               | Singlet-A        | H-13->LUMO (16%), HOMO->L+4 (51%)                                |
| 28  | 26056.54                   | 383.78          | 0.0136              | Singlet-A        | H-13->LUMO (48%), H-12->LUMO (17%), HOMO->L+4 (14%)              |
| 29  | 26125.10                   | 382.77          | 0.0252              | Singlet-A        | H-15->LUMO (30%), H-14->LUMO (26%), H-10->LUMO (12%),            |
| 30  | 26289.64                   | 380.37          | 0.0171              | Singlet-A        | H-21->LUMO (32%), H-18->LUMO (10%), H-12->LUMO (14%)             |



Table S9: Summary of UV-vis spectral data of **7e**

| No. | Energy (cm <sup>-1</sup> ) | Wavelength (nm) | Oscillator Strength | Symmetry         | Major contributions                                               |
|-----|----------------------------|-----------------|---------------------|------------------|-------------------------------------------------------------------|
| 1   | 4615.910                   | 2166.42         | 0.09060             | Singlet-A        | HOMO->LUMO (117%)                                                 |
| 2   | 11126.41                   | 898.76          | 0.09960             | Singlet-A        | H-2->LUMO (22%), HOMO->L+1 (71%)                                  |
| 3   | 12239.46                   | 817.03          | 0.00040             | Singlet-A        | H-3->LUMO (65%), H-1->LUMO (16%)                                  |
| 4   | 13556.56                   | 737.65          | 0.01110             | Singlet-A        | H-2->LUMO (11%), H-1->LUMO (74%)                                  |
| 5   | <b>14017.10</b>            | <b>713.41</b>   | <b>0.16550</b>      | <b>Singlet-A</b> | <b>H-2-&gt;LUMO (34%), HOMO-&gt;L+1 (20%), HOMO-&gt;L+2 (10%)</b> |
| 6   | 15776.20                   | 633.87          | 0.05700             | Singlet-A        | H-5->LUMO (10%), HOMO->L+2 (66%)                                  |
| 7   | <b>17256.23</b>            | <b>579.50</b>   | <b>0.10870</b>      | <b>Singlet-A</b> | <b>H-5-&gt;LUMO (11%), H-4-&gt;LUMO (48%), H-2-&gt;LUMO (10%)</b> |
| 8   | 17342.53                   | 576.62          | 0.00150             | Singlet-A        | H-3->L+4 (12%), H-2->L+1 (20%), H-2->L+3 (17%)                    |
| 9   | 17712.74                   | 564.57          | 0.01350             | Singlet-A        | H-4->LUMO (15%), H-3->L+1 (16%), H-3->L+3 (28%)                   |
| 10  | 18589.46                   | 537.94          | 0.02060             | Singlet-A        | H-10->LUMO (29%), H-6->LUMO (18%)                                 |
| 11  | <b>19429.08</b>            | <b>514.69</b>   | <b>0.31940</b>      | <b>Singlet-A</b> | <b>H-5-&gt;LUMO (49%)</b>                                         |
| 12  | <b>19945.28</b>            | <b>501.37</b>   | <b>0.40410</b>      | <b>Singlet-A</b> | <b>H-6-&gt;LUMO (67%)</b>                                         |
| 13  | 20473.57                   | 488.43          | 0.00430             | Singlet-A        | H-10->L+3 (13%), H-2->L+4 (22%)                                   |
| 14  | 21532.58                   | 464.41          | 0.02290             | Singlet-A        | H-10->LUMO (11%), H-2->L+1 (14%), H-1->L+1 (17%),                 |
| 15  | 21580.17                   | 463.39          | 0.09370             | Singlet-A        | H-2->L+1 (18%), H-1->L+1 (59%)                                    |
| 16  | 22121.36                   | 452.05          | 0.01350             | Singlet-A        | H-7->LUMO (70%)                                                   |
| 17  | 22599.65                   | 442.48          | 0.01620             | Singlet-A        | H-10->LUMO (10%), H-3->L+4 (14%), HOMO->L+3 (15%)                 |
| 18  | 23160.21                   | 431.78          | 0.00210             | <b>Singlet-A</b> | H-8->LUMO (78%), H-7->LUMO (10%)                                  |
| 19  | 23448.95                   | 426.46          | 0.02220             | <b>Singlet-A</b> | H-11->LUMO (58%), HOMO->L+3 (10%)                                 |
| 20  | 23536.87                   | 424.87          | 0.00220             | Singlet-A        | H-9->LUMO (73%)                                                   |
| 21  | 23619.94                   | 423.37          | 0.05830             | Singlet-A        | H-11->LUMO (15%), H-9->LUMO (15%), H-3->L+1 (18%)                 |
| 22  | <b>24233.73</b>            | <b>412.65</b>   | <b>0.11780</b>      | <b>Singlet-A</b> | <b>H-10-&gt;LUMO (11%), H-2-&gt;L+1 (26%)</b>                     |
| 23  | 24549.90                   | 407.33          | 0.01230             | Singlet-A        | H-12->LUMO (75%)                                                  |
| 24  | 24915.27                   | 401.36          | 0.08790             | Singlet-A        | H-14->LUMO (12%), H-13->LUMO (54%)                                |
| 25  | 25153.20                   | 397.56          | 0.03230             | Singlet-A        | H-4->L+1 (63%)                                                    |
| 26  | 25380.65                   | 394.00          | 0.01040             | Singlet-A        | H-15->LUMO (11%), H-3->L+1 (24%)                                  |
| 27  | 25528.25                   | 391.72          | 0.00460             | Singlet-A        | H-14->LUMO (69%), H-13->LUMO (17%)                                |
| 28  | 25723.44                   | 388.75          | 0.03890             | Singlet-A        | H-15->LUMO (37%), H-1->L+2 (40%)                                  |
| 29  | 25928.30                   | 385.68          | 0.03220             | Singlet-A        | H-15->LUMO (21%), H-1->L+2 (38%)                                  |
| 30  | 26192.85                   | 381.78          | 0.01780             | Singlet-A        | H-5->L+1 (64%)                                                    |

Table S10: Summary of UV-vis spectral data of **7f**

| No. | Energy (cm <sup>-1</sup> ) | Wavelength (nm) | Oscillator Strength | Symmetry         | Major contributions                                               |
|-----|----------------------------|-----------------|---------------------|------------------|-------------------------------------------------------------------|
| 1   | 4615.910                   | 2166.42         | 0.09060             | Singlet-A        | HOMO->LUMO (117%)                                                 |
| 2   | 11126.41                   | 898.76          | 0.09960             | Singlet-A        | H-2->LUMO (22%), HOMO->L+1 (71%)                                  |
| 3   | 12239.46                   | 817.03          | 0.00040             | Singlet-A        | H-3->LUMO (65%), H-1->LUMO (16%)                                  |
| 4   | 13556.56                   | 737.65          | 0.01110             | Singlet-A        | H-2->LUMO (11%), H-1->LUMO (74%)                                  |
| 5   | <b>14017.10</b>            | <b>713.41</b>   | <b>0.16550</b>      | <b>Singlet-A</b> | <b>H-2-&gt;LUMO (34%), HOMO-&gt;L+1 (20%), HOMO-&gt;L+2 (10%)</b> |
| 6   | 15776.20                   | 633.87          | 0.05700             | Singlet-A        | H-5->LUMO (10%), HOMO->L+2 (66%)                                  |
| 7   | <b>17256.23</b>            | <b>579.50</b>   | <b>0.10870</b>      | <b>Singlet-A</b> | <b>H-5-&gt;LUMO (11%), H-4-&gt;LUMO (48%), H-2-&gt;LUMO (10%)</b> |
| 8   | 17342.53                   | 576.62          | 0.00150             | Singlet-A        | H-3->L+4 (12%), H-2->L+1 (20%), H-2->L+3 (17%)                    |
| 9   | 17712.74                   | 564.57          | 0.01350             | Singlet-A        | H-4->LUMO (15%), H-3->L+1 (16%), H-3->L+3 (28%)                   |
| 10  | 18589.46                   | 537.94          | 0.02060             | Singlet-A        | H-10->LUMO (29%), H-6->LUMO (18%)                                 |
| 11  | <b>19429.08</b>            | <b>514.69</b>   | <b>0.31940</b>      | <b>Singlet-A</b> | <b>H-5-&gt;LUMO (49%)</b>                                         |
| 12  | <b>19945.28</b>            | <b>501.37</b>   | <b>0.40410</b>      | <b>Singlet-A</b> | <b>H-6-&gt;LUMO (67%)</b>                                         |
| 13  | 20473.57                   | 488.43          | 0.00430             | Singlet-A        | H-10->L+3 (13%), H-2->L+4 (22%)                                   |
| 14  | 21532.58                   | 464.41          | 0.02290             | Singlet-A        | H-10->LUMO (11%), H-2->L+1 (14%), H-1->L+1 (17%),                 |
| 15  | 21580.17                   | 463.39          | 0.09370             | Singlet-A        | H-2->L+1 (18%), H-1->L+1 (59%)                                    |
| 16  | 22121.36                   | 452.05          | 0.01350             | Singlet-A        | H-7->LUMO (70%)                                                   |
| 17  | 22599.65                   | 442.48          | 0.01620             | Singlet-A        | H-10->LUMO (10%), H-3->L+4 (14%), HOMO->L+3 (15%)                 |
| 18  | 23160.21                   | 431.78          | 0.00210             | <b>Singlet-A</b> | H-8->LUMO (78%), H-7->LUMO (10%)                                  |
| 19  | 23448.95                   | 426.46          | 0.02220             | <b>Singlet-A</b> | H-11->LUMO (58%), HOMO->L+3 (10%)                                 |
| 20  | 23536.87                   | 424.87          | 0.00220             | Singlet-A        | H-9->LUMO (73%)                                                   |
| 21  | 23619.94                   | 423.37          | 0.05830             | Singlet-A        | H-11->LUMO (15%), H-9->LUMO (15%), H-3->L+1 (18%)                 |
| 22  | <b>24233.73</b>            | <b>412.65</b>   | <b>0.11780</b>      | <b>Singlet-A</b> | <b>H-10-&gt;LUMO (11%), H-2-&gt;L+1 (26%)</b>                     |
| 23  | 24549.90                   | 407.33          | 0.01230             | Singlet-A        | H-12->LUMO (75%)                                                  |
| 24  | 24915.27                   | 401.36          | 0.08790             | Singlet-A        | H-14->LUMO (12%), H-13->LUMO (54%)                                |
| 25  | 25153.20                   | 397.56          | 0.03230             | Singlet-A        | H-4->L+1 (63%)                                                    |
| 26  | 25380.65                   | 394.00          | 0.01040             | Singlet-A        | H-15->LUMO (11%), H-3->L+1 (24%)                                  |
| 27  | 25528.25                   | 391.72          | 0.00460             | Singlet-A        | H-14->LUMO (69%), H-13->LUMO (17%)                                |
| 28  | 25723.44                   | 388.75          | 0.03890             | Singlet-A        | H-15->LUMO (37%), H-1->L+2 (40%)                                  |
| 29  | 25928.30                   | 385.68          | 0.03220             | Singlet-A        | H-15->LUMO (21%), H-1->L+2 (38%)                                  |
| 30  | 26192.85                   | 381.78          | 0.01780             | Singlet-A        | H-5->L+1 (64%)                                                    |

Table S11: Summary of UV-vis spectral data of **7g**

| No. | Energy (cm <sup>-1</sup> ) | Wavelength (nm) | Oscillator Strength | Symmetry         | Major contributions                                               |
|-----|----------------------------|-----------------|---------------------|------------------|-------------------------------------------------------------------|
| 1   | 4615.910                   | 2166.42         | 0.09060             | Singlet-A        | HOMO->LUMO (117%)                                                 |
| 2   | 11126.41                   | 898.76          | 0.09960             | Singlet-A        | H-2->LUMO (22%), HOMO->L+1 (71%)                                  |
| 3   | 12239.46                   | 817.03          | 0.00040             | Singlet-A        | H-3->LUMO (65%), H-1->LUMO (16%)                                  |
| 4   | 13556.56                   | 737.65          | 0.01110             | Singlet-A        | H-2->LUMO (11%), H-1->LUMO (74%)                                  |
| 5   | <b>14017.10</b>            | <b>713.41</b>   | <b>0.16550</b>      | <b>Singlet-A</b> | <b>H-2-&gt;LUMO (34%), HOMO-&gt;L+1 (20%), HOMO-&gt;L+2 (10%)</b> |
| 6   | 15776.20                   | 633.87          | 0.05700             | Singlet-A        | H-5->LUMO (10%), HOMO->L+2 (66%)                                  |
| 7   | <b>17256.23</b>            | <b>579.50</b>   | <b>0.10870</b>      | <b>Singlet-A</b> | <b>H-5-&gt;LUMO (11%), H-4-&gt;LUMO (48%), H-2-&gt;LUMO (10%)</b> |
| 8   | 17342.53                   | 576.62          | 0.00150             | Singlet-A        | H-3->L+4 (12%), H-2->L+1 (20%), H-2->L+3 (17%)                    |
| 9   | 17712.74                   | 564.57          | 0.01350             | Singlet-A        | H-4->LUMO (15%), H-3->L+1 (16%), H-3->L+3 (28%)                   |
| 10  | 18589.46                   | 537.94          | 0.02060             | Singlet-A        | H-10->LUMO (29%), H-6->LUMO (18%)                                 |
| 11  | <b>19429.08</b>            | <b>514.69</b>   | <b>0.31940</b>      | <b>Singlet-A</b> | <b>H-5-&gt;LUMO (49%)</b>                                         |
| 12  | <b>19945.28</b>            | <b>501.37</b>   | <b>0.40410</b>      | <b>Singlet-A</b> | <b>H-6-&gt;LUMO (67%)</b>                                         |
| 13  | 20473.57                   | 488.43          | 0.00430             | Singlet-A        | H-10->L+3 (13%), H-2->L+4 (22%)                                   |
| 14  | 21532.58                   | 464.41          | 0.02290             | Singlet-A        | H-10->LUMO (11%), H-2->L+1 (14%), H-1->L+1 (17%),                 |
| 15  | 21580.17                   | 463.39          | 0.09370             | Singlet-A        | H-2->L+1 (18%), H-1->L+1 (59%)                                    |
| 16  | 22121.36                   | 452.05          | 0.01350             | Singlet-A        | H-7->LUMO (70%)                                                   |
| 17  | 22599.65                   | 442.48          | 0.01620             | Singlet-A        | H-10->LUMO (10%), H-3->L+4 (14%), HOMO->L+3 (15%)                 |
| 18  | 23160.21                   | 431.78          | 0.00210             | <b>Singlet-A</b> | H-8->LUMO (78%), H-7->LUMO (10%)                                  |
| 19  | 23448.95                   | 426.46          | 0.02220             | <b>Singlet-A</b> | H-11->LUMO (58%), HOMO->L+3 (10%)                                 |
| 20  | 23536.87                   | 424.87          | 0.00220             | Singlet-A        | H-9->LUMO (73%)                                                   |
| 21  | 23619.94                   | 423.37          | 0.05830             | Singlet-A        | H-11->LUMO (15%), H-9->LUMO (15%), H-3->L+1 (18%)                 |
| 22  | <b>24233.73</b>            | <b>412.65</b>   | <b>0.11780</b>      | <b>Singlet-A</b> | <b>H-10-&gt;LUMO (11%), H-2-&gt;L+1 (26%)</b>                     |
| 23  | 24549.90                   | 407.33          | 0.01230             | Singlet-A        | H-12->LUMO (75%)                                                  |
| 24  | 24915.27                   | 401.36          | 0.08790             | Singlet-A        | H-14->LUMO (12%), H-13->LUMO (54%)                                |
| 25  | 25153.20                   | 397.56          | 0.03230             | Singlet-A        | H-4->L+1 (63%)                                                    |
| 26  | 25380.65                   | 394.00          | 0.01040             | Singlet-A        | H-15->LUMO (11%), H-3->L+1 (24%)                                  |
| 27  | 25528.25                   | 391.72          | 0.00460             | Singlet-A        | H-14->LUMO (69%), H-13->LUMO (17%)                                |
| 28  | 25723.44                   | 388.75          | 0.03890             | Singlet-A        | H-15->LUMO (37%), H-1->L+2 (40%)                                  |
| 29  | 25928.30                   | 385.68          | 0.03220             | Singlet-A        | H-15->LUMO (21%), H-1->L+2 (38%)                                  |
| 30  | 26192.85                   | 381.78          | 0.01780             | Singlet-A        | H-5->L+1 (64%)                                                    |

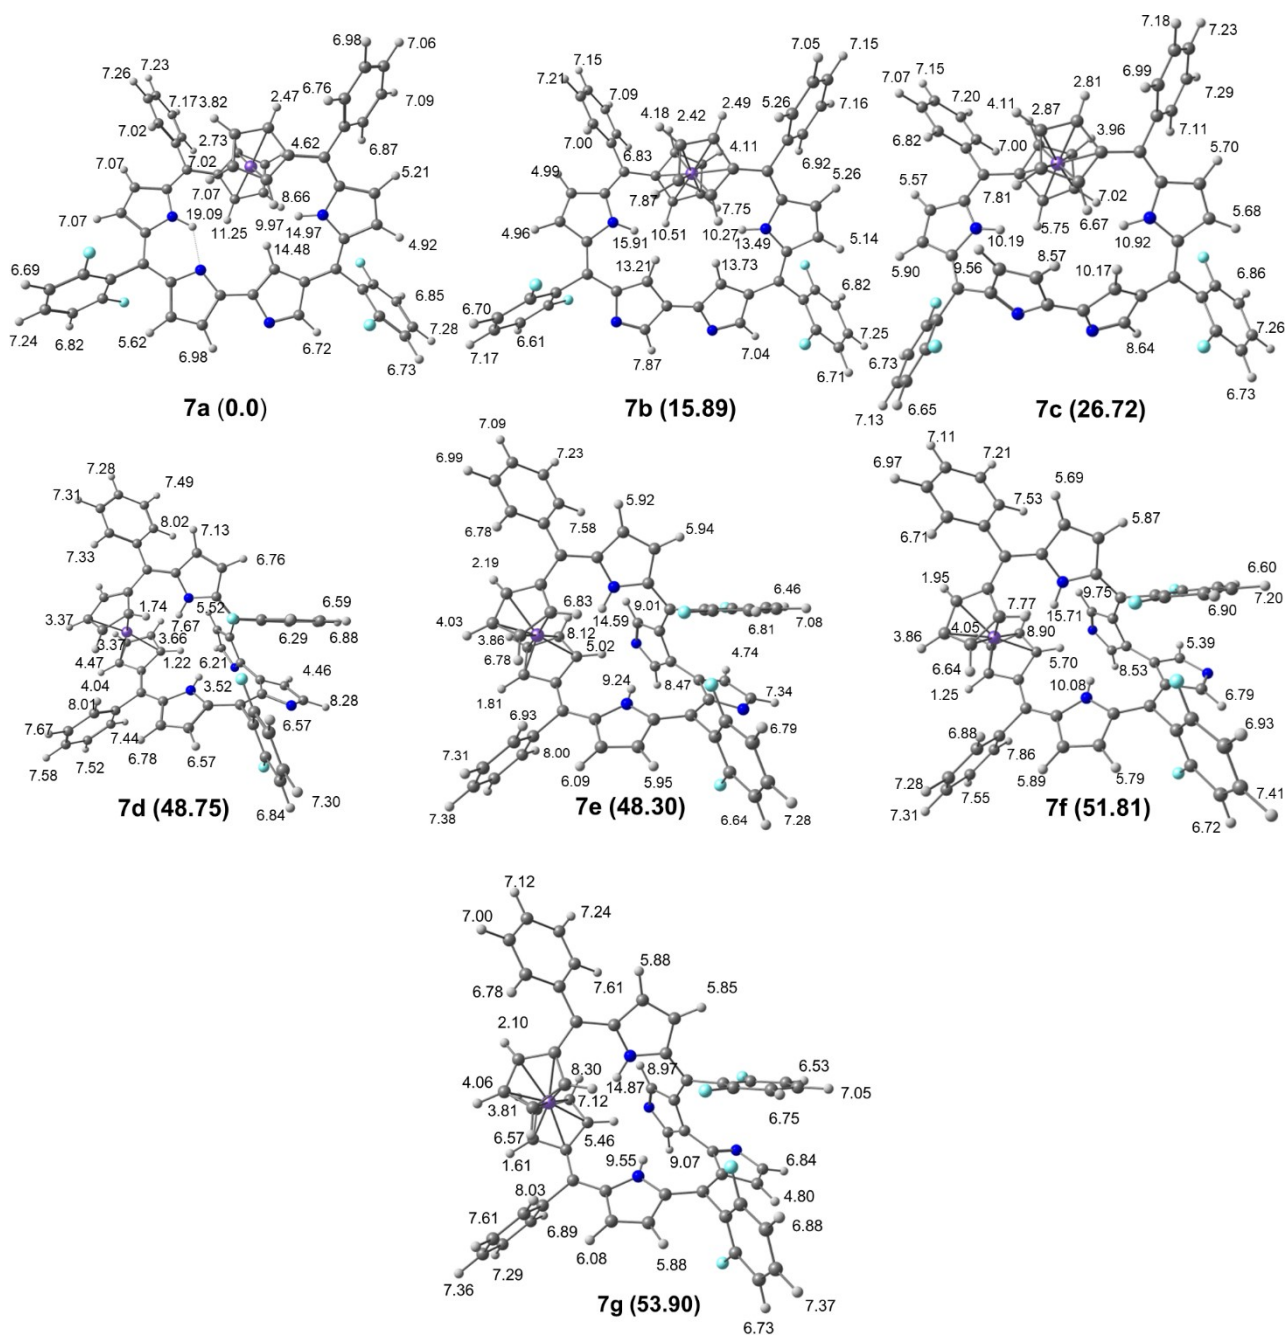

Fig. S55  $^1\text{H}$  chemical shifts predicted for the Isomers of **7** at uB3LYP/LanL2DZ(Fe) and 6-31G\*\* (for rest of the atoms) level of theory.

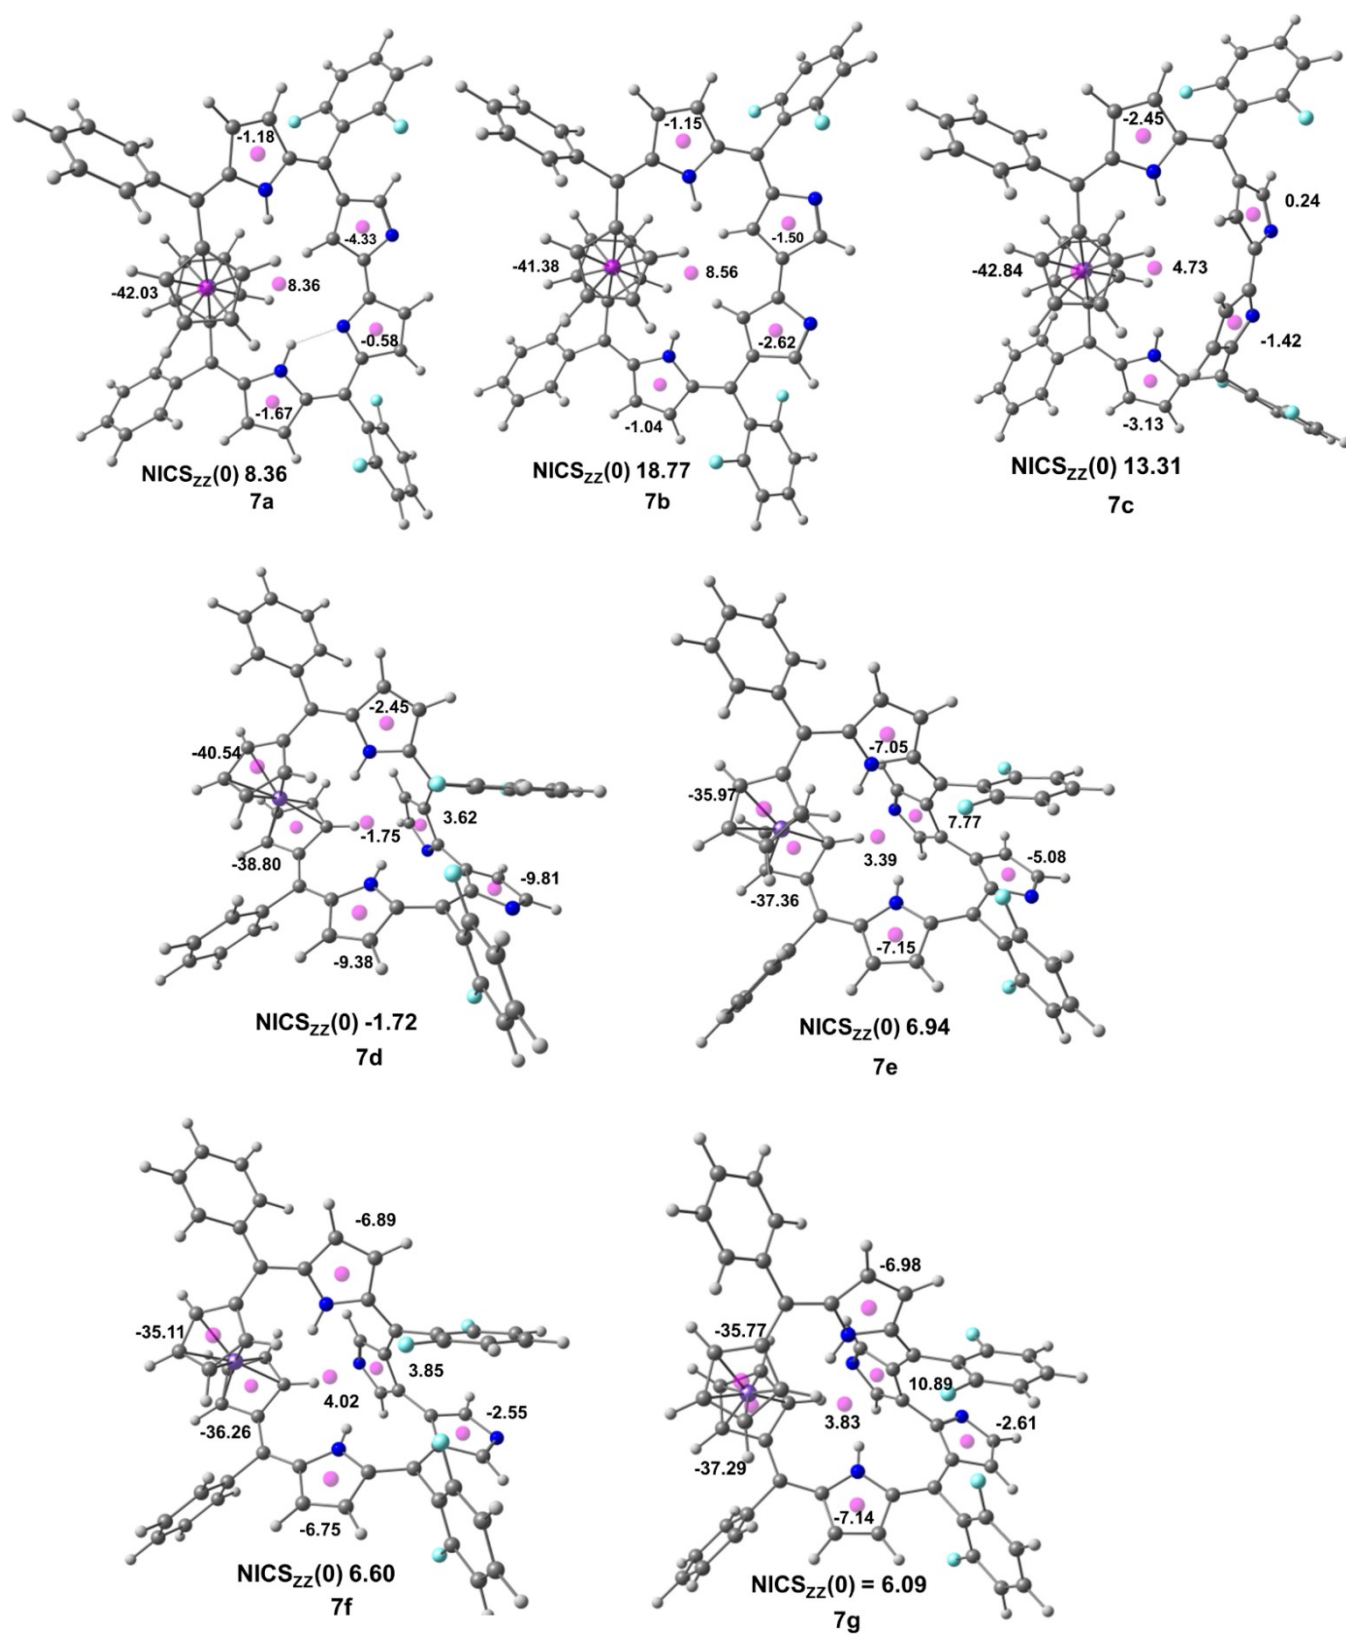

Fig. S56 NICS (0) and NICS<sub>zz</sub>(0) value for Isomers of **7** at uB3LYP/LanL2DZ(Fe) and 6-31G\*\* (for rest of the atoms) level of theory.



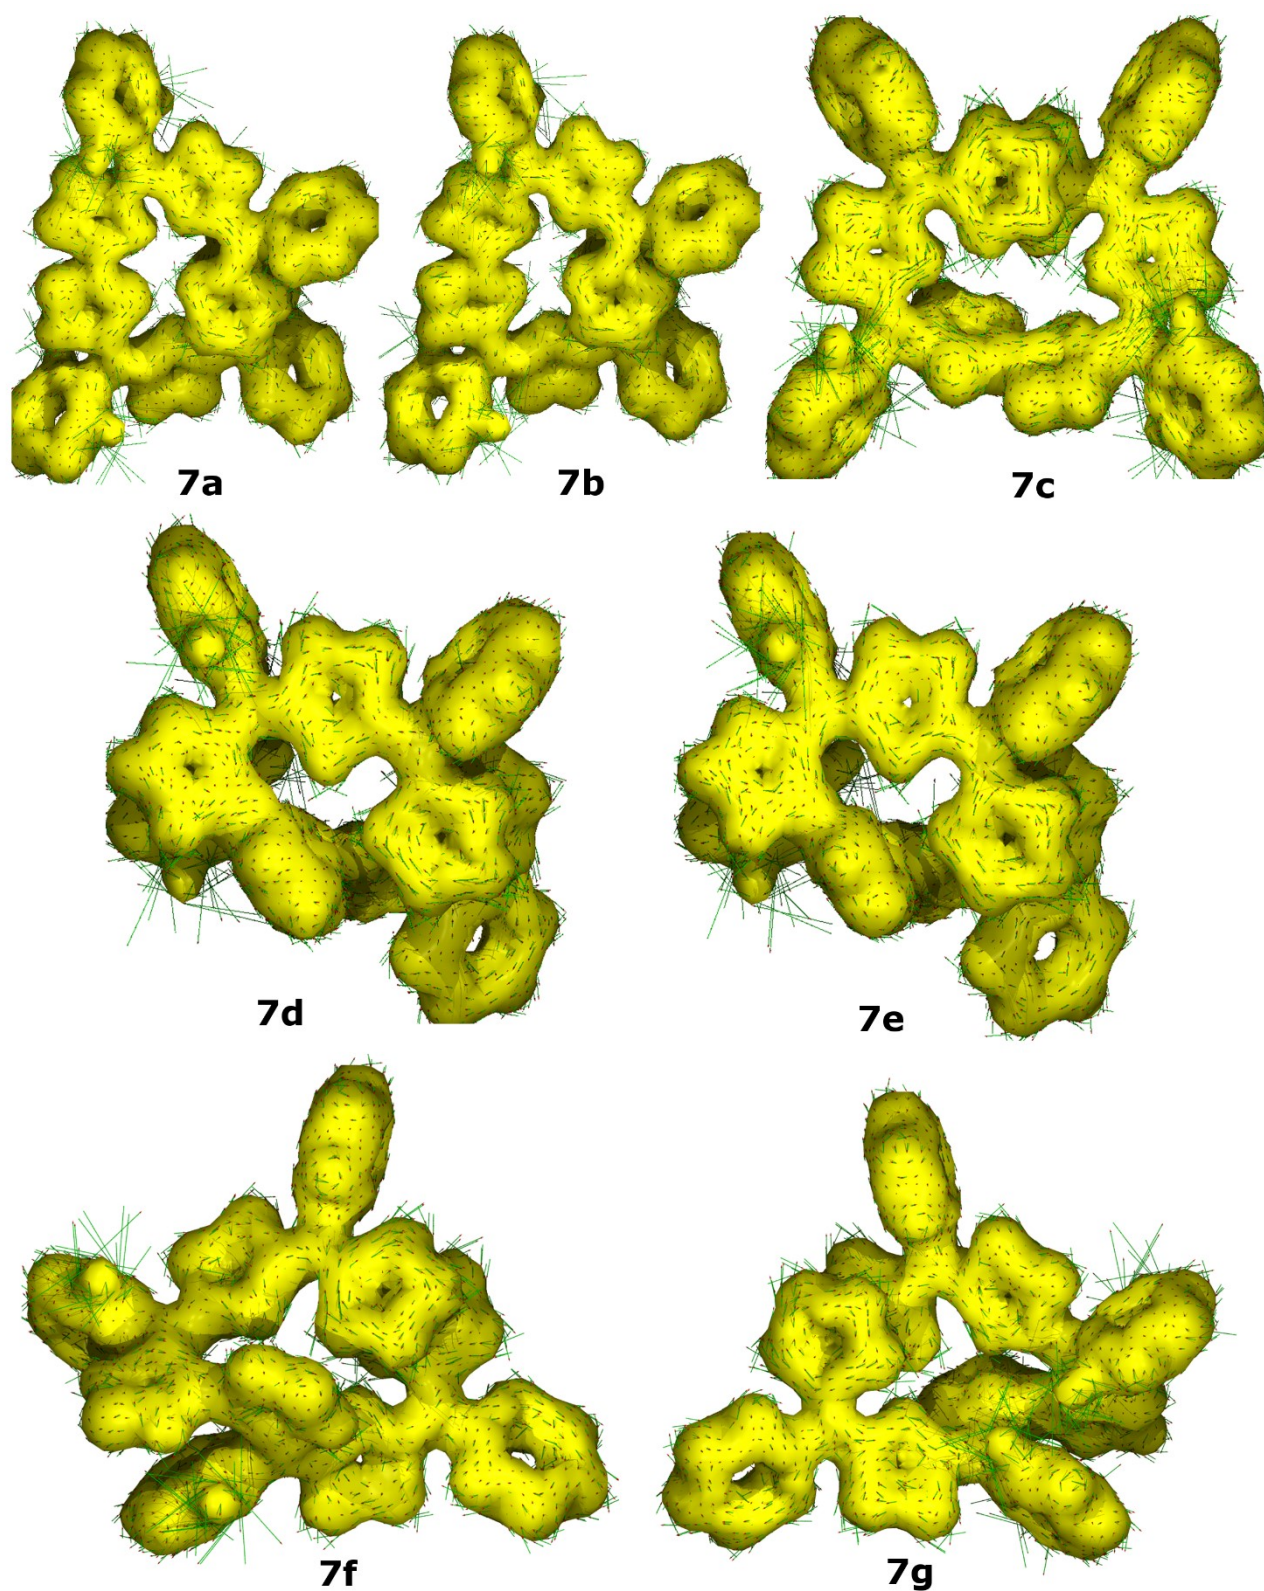

Fig. S57 AICD plot for Isomers of **7** at uB3LYP/LanL2DZ(Fe) and 6-31G\*\* (for rest of the atoms) level of theory.



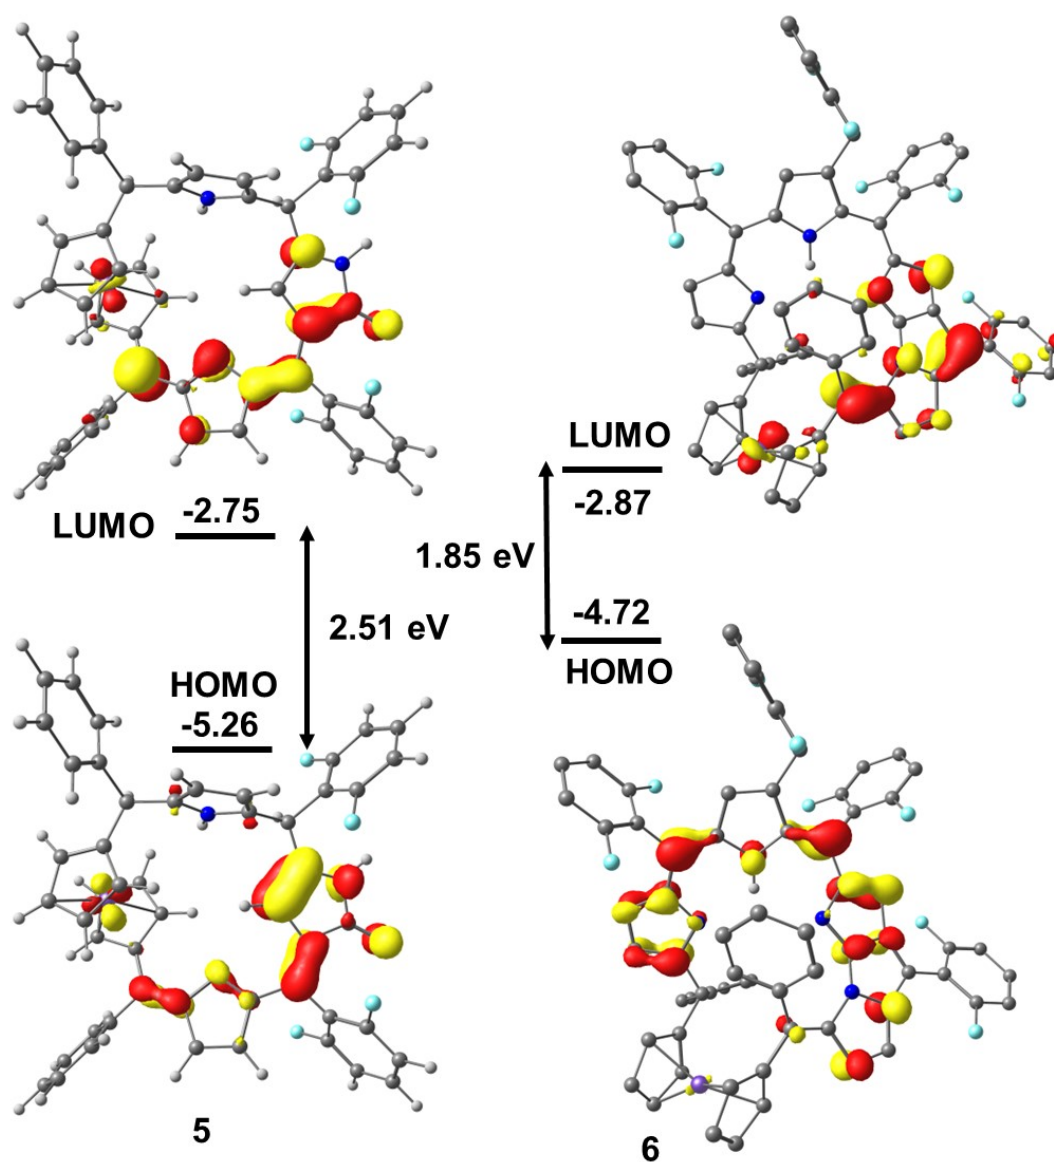

Fig. S58: HOMO-LUMO gap of DFT optimized structures of **5** and **6**.

Table 12: HOMO-LUMO Gap (eV) of isomers of **7** at uB3LYP/LanL2DZ(Fe) and 6-31G\*\* (for rest of the atoms) level of theory.

| S.No | Isomers   | HOMO (eV) | LUMO (eV) | HOMO-LUMO gap (eV) |
|------|-----------|-----------|-----------|--------------------|
| 1    | <b>7a</b> | -4.51     | -3.18     | 1.34               |
| 2    | <b>7b</b> | -4.54     | -3.28     | 1.26               |
| 3    | <b>7c</b> | -4.58     | -3.20     | 1.38               |
| 4    | <b>7d</b> | -4.27     | -3.34     | 0.92               |
| 5    | <b>7e</b> | -4.19     | -3.38     | 0.81               |
| 6    | <b>7f</b> | -4.21     | -3.41     | 0.81               |
| 7    | <b>7g</b> | -4.22     | -3.40     | 0.82               |

Table 13: Total electronic energy (E), zero point energy (ZPE), free energy (G) in hartree of **5**, **6**, deprotonated **6** and isomers of **7a-7g** at uB3LYP/LANL2DZ (Fe) and 6-31G\*\* (for rest of the atoms) level of theory. Relative energies of isomers of **7** are given in kcal/mol.

|                         | E            | E+ZPE        | G            | $\Delta E$ | $\Delta E+ZPE$ | $\Delta G$ |
|-------------------------|--------------|--------------|--------------|------------|----------------|------------|
| <b>5</b>                | -2687.429556 | -2686.729981 | -2686.814487 |            |                |            |
| <b>6</b>                | -3756.401141 | -3755.502144 | -3755.608186 |            |                |            |
| <b>[6]<sup>-1</sup></b> | -3755.822907 | -3754.939911 | -3755.045953 |            |                |            |
| <b>7</b>                | -2819.959645 | -2819.224889 | -2819.311229 | 0.0        | 0.0            | 0.0        |
| <b>7b</b>               | -2819.933375 | -2819.199346 | -2819.28591  | 16.48      | 16.03          | 15.89      |
| <b>7c</b>               | -2819.916055 | -2819.182523 | -2819.26865  | 27.35      | 26.59          | 26.72      |
| <b>7d</b>               | -2819.881366 | -2819.149068 | -2819.233544 | 49.12      | 47.58          | 48.75      |
| <b>7e</b>               | -2819.882653 | -2819.149738 | -2819.234266 | 48.31      | 47.16          | 48.30      |
| <b>7f</b>               | -2819.87675  | -2819.143636 | -2819.228661 | 52.02      | 50.99          | 51.81      |
| <b>7g</b>               | -2819.873341 | -2819.140538 | -2819.225326 | 54.16      | 52.93          | 53.90      |

## Cartesian Coordinates

5

E=-2687.429555, NImag =0

|    |           |           |           |
|----|-----------|-----------|-----------|
| 26 | -2.425901 | -2.274255 | -0.867697 |
| 9  | -0.309113 | 5.302817  | -2.569528 |
| 9  | 1.094789  | 4.496902  | 1.858379  |
| 7  | -1.844225 | 1.871450  | -0.618060 |
| 1  | -1.638507 | 1.449214  | -1.510475 |
| 6  | 3.737647  | 2.200152  | -0.125176 |
| 6  | -3.650816 | -0.872129 | 0.100072  |
| 6  | -6.175527 | 1.807073  | -0.575706 |
| 6  | -1.729292 | -3.748267 | -2.127285 |
| 6  | -1.616855 | 3.035597  | 1.257990  |
| 6  | -2.936316 | 1.553084  | 0.162285  |
| 6  | -2.442163 | -2.782096 | -2.885502 |
| 6  | -3.983195 | 0.561110  | -0.291511 |
| 6  | -7.427257 | 2.227738  | -0.125981 |
| 6  | -1.027782 | 2.773287  | 0.036732  |
| 6  | -2.612677 | -1.309504 | 0.980388  |
| 6  | -2.725629 | -2.723051 | 1.138860  |
| 6  | -1.790333 | -1.522336 | -2.716949 |
| 6  | 0.368338  | -3.753036 | -0.619501 |
| 6  | -5.368791 | 0.978080  | 0.213802  |
| 6  | -0.600677 | -3.097499 | -1.494330 |
| 6  | 1.469233  | 2.524404  | -0.306650 |
| 6  | 0.662158  | 7.604040  | 0.050642  |
| 6  | 1.457007  | -3.123151 | -0.043698 |
| 6  | -0.671557 | -1.703507 | -1.861444 |
| 6  | 0.104968  | 5.756079  | -1.364708 |
| 6  | 0.217990  | 3.321618  | -0.621320 |
| 6  | 0.230337  | 7.128876  | -1.187261 |
| 6  | -2.814966 | 2.275523  | 1.333910  |
| 7  | 2.730891  | 3.100420  | -0.471053 |
| 6  | 0.813250  | 5.352270  | 0.852584  |
| 6  | 0.958894  | 6.714785  | 1.083952  |
| 6  | -3.834052 | -3.170220 | 0.360075  |
| 6  | 1.596589  | 1.213040  | 0.033607  |
| 6  | 2.923442  | -1.574650 | 0.384011  |
| 6  | -5.845682 | 0.576027  | 1.467964  |
| 6  | 3.630999  | -0.294686 | 0.378805  |
| 6  | 3.003960  | 0.904361  | 0.149157  |
| 6  | 0.386878  | 4.817150  | -0.367320 |
| 6  | -7.096031 | 0.999398  | 1.922854  |
| 6  | -4.400615 | -2.030292 | -0.285471 |
| 6  | -0.015148 | -5.703136 | 0.925941  |
| 6  | -7.891634 | 1.825836  | 1.127931  |
| 6  | 0.187041  | -5.215195 | -0.375574 |
| 6  | 0.227076  | -6.135236 | -1.437291 |
| 6  | 0.071145  | -7.500862 | -1.202330 |
| 6  | -0.181045 | -7.069174 | 1.158835  |
| 6  | -0.138484 | -7.972401 | 0.095723  |
| 6  | 5.099566  | -0.362839 | 0.621837  |
| 6  | 7.878746  | -0.579914 | 1.108289  |
| 6  | 7.083048  | 0.189044  | 1.958150  |
| 9  | 4.965222  | 1.025249  | 2.524931  |
| 6  | 5.723298  | 0.285676  | 1.695687  |
| 6  | 7.314348  | -1.242016 | 0.018635  |
| 6  | 5.946982  | -1.119094 | -0.197052 |
| 9  | 5.406719  | -1.756619 | -1.255931 |
| 7  | 1.746674  | -1.768526 | -0.194671 |
| 6  | 2.532630  | -3.774818 | 0.706413  |

|   |           |           |           |
|---|-----------|-----------|-----------|
| 6 | 3.450735  | -2.811843 | 0.966705  |
| 8 | 4.927217  | 2.467601  | -0.108442 |
| 1 | 2.913716  | 4.084810  | -0.589389 |
| 1 | -4.027453 | 0.603892  | -1.388003 |
| 1 | 0.072097  | 3.237839  | -1.706887 |

6

Energy = -3756.401141, NImag =0.0

|    |           |           |           |
|----|-----------|-----------|-----------|
| 26 | 0.081765  | 5.958271  | 0.059765  |
| 9  | -0.253828 | -0.007730 | 6.654541  |
| 9  | 2.826296  | 2.771063  | 8.940319  |
| 9  | 2.155224  | 12.982884 | 6.580534  |
| 9  | -1.122581 | 6.204661  | 10.466390 |
| 9  | -1.425422 | 12.160472 | 3.622897  |
| 9  | 2.865921  | 8.558704  | 9.592612  |
| 9  | -3.416792 | 10.176717 | 9.251335  |
| 9  | 0.250843  | 12.485291 | 11.086501 |
| 7  | 0.017947  | 3.942382  | 5.180663  |
| 7  | 1.376829  | 9.047770  | 3.907185  |
| 7  | 0.592185  | 9.014494  | 6.601522  |
| 7  | 0.192892  | 6.103697  | 6.429129  |
| 6  | -0.336052 | 3.927931  | 3.810315  |
| 6  | 0.278275  | 4.817806  | 6.220413  |
| 6  | 0.822509  | 2.629126  | 6.937168  |
| 6  | 0.751224  | 4.011626  | 7.354038  |
| 6  | 1.856706  | 8.843465  | 2.699447  |
| 6  | 2.119045  | 7.442444  | 2.185896  |
| 1  | 1.565077  | 6.779483  | 2.857784  |
| 6  | -0.888055 | 4.960713  | 3.073741  |
| 6  | 0.362485  | 10.345748 | 6.366288  |
| 6  | -1.619112 | 6.068712  | 3.741458  |
| 6  | 1.200848  | 10.431618 | 4.021288  |
| 6  | -0.922898 | 4.861706  | 1.609457  |
| 6  | 0.571901  | 6.214327  | 7.791294  |
| 6  | 3.603119  | 7.098679  | 2.348092  |
| 6  | 1.255945  | 1.476429  | 7.725344  |
| 6  | 0.551461  | 7.403703  | 8.485708  |
| 6  | 0.934125  | 4.914328  | 8.361668  |
| 1  | 1.305292  | 4.746412  | 9.359797  |
| 6  | 0.392059  | 2.640792  | 5.611307  |
| 6  | 1.634909  | 11.086074 | 2.798296  |
| 1  | 1.629845  | 12.150901 | 2.610347  |
| 6  | 0.308272  | 8.704825  | 7.904202  |
| 6  | 1.605275  | 7.262181  | 0.761309  |
| 6  | -1.506063 | 7.407841  | 3.333188  |
| 1  | -0.814582 | 7.662469  | 2.542028  |
| 6  | -0.167681 | 9.893350  | 8.531007  |
| 6  | -0.133190 | 10.896408 | 7.565792  |
| 1  | -0.437517 | 11.923222 | 7.700540  |
| 6  | -2.245946 | 8.412740  | 3.954453  |
| 1  | -2.111458 | 9.446651  | 3.649985  |
| 6  | 2.079466  | -0.746567 | 9.317036  |
| 1  | 2.394011  | -1.591823 | 9.920102  |
| 6  | 0.714951  | 0.184818  | 7.579800  |
| 6  | 2.062457  | 10.092018 | 1.971142  |
| 1  | 2.460025  | 10.188021 | 0.969945  |
| 6  | -0.661317 | 13.014618 | 4.334392  |
| 6  | -0.136842 | 2.543979  | 3.412951  |
| 1  | -0.387799 | 2.167246  | 2.433866  |
| 6  | 0.669223  | 11.028104 | 5.146614  |





1 -4.070672 4.617240 6.377001  
 6 -1.864427 2.806105 2.442252  
 1 -2.787723 3.367245 2.438725  
 6 -3.082156 -0.294604 -1.590804  
 1 -2.663885 -0.923086 -0.810177  
 6 -3.731391 6.534297 5.447275  
 1 -4.574742 7.014456 5.934915  
 6 -2.289935 0.726447 -2.144756  
 6 -2.855674 1.540704 -3.142860  
 1 -2.256915 2.330839 -3.585860  
 6 -4.163218 1.332643 -3.577902  
 1 -4.576669 1.964907 -4.358508  
 6 -4.393198 -0.499566 -2.023982  
 1 -4.988947 -1.291374 -1.578735  
 6 -4.938141 0.312611 -3.019271  
 1 -5.958178 0.154175 -3.356835  
 6 3.778203 -2.932622 -2.029463  
 6 4.717353 -5.448482 -2.935419  
 1 5.079097 -6.411570 -3.281098  
 6 3.840487 -5.385459 -1.852442  
 1 3.503448 -6.274682 -1.332005  
 9 2.546551 -4.086963 -0.380493  
 6 3.395769 -4.138870 -1.426783  
 6 5.130766 -4.281489 -3.578263  
 1 5.805066 -4.299740 -4.426880  
 6 4.651293 -3.060202 -3.118443  
 9 5.047086 -1.939450 -3.752839  
 1 3.038888 2.955881 1.164437  
 7 1.316061 -0.161248 -1.341892  
 6 -0.232074 -1.378267 -2.454609  
 6 0.915939 -2.105803 -2.421460  
 1 -1.159807 -1.648557 -2.935548  
 1 1.090586 -3.075255 -2.863962  
 1 1.869609 0.515154 -0.814786  
 6 4.969123 1.126801 -0.053829  
 6 6.128635 0.296169 -0.380580  
 6 5.637107 -0.843004 -0.917372  
 6 4.177590 -0.678368 -0.969726  
 7 3.801922 0.507267 -0.432820  
 1 7.150966 0.579223 -0.179912  
 1 6.187377 -1.707703 -1.258948  
 1 7.014025 4.655578 1.688481  
 1 1.902706 4.100404 2.092990

**7b**

Energy = -2819.933375, NImag=0.0

Fe, -0.595633, 2.771580, 0.793116  
 F, 4.346750, 8.129516, 1.912799  
 F, 6.780228, 4.870992, 4.305252  
 N, 2.094751, 4.797151, 2.859213  
 N, 6.438746, 3.021163, 0.685305  
 C, -0.550773, 3.343706, 2.841528  
 C, -1.738477, 6.725367, 3.693965  
 H, -1.100370, 7.232645, 2.976795  
 C, -1.724546, 3.162900, -0.892483  
 H, -2.793013, 3.012746, -0.933333  
 C, 2.692051, 6.599041, 4.079208  
 H, 3.314643, 7.339818, 4.558770  
 C, 0.934678, 5.261968, 3.485728  
 C, -1.069137, 4.353338, -0.474085  
 H, -1.554210, 5.258041, -0.134980  
 C, -0.309838, 4.668619, 3.426185

C, -2.820060, 7.399797, 4.261636  
 H, -3.011045, 8.434007, 3.989299  
 C, 3.189173, 5.591095, 3.168128  
 C, 0.393191, 2.281400, 2.588277  
 H, 1.447604, 2.303629, 2.816793  
 C, -0.310614, 1.150841, 2.084595  
 H, 0.132909, 0.209022, 1.791562  
 C, 0.334103, 4.116669, -0.518958  
 H, 1.111292, 4.822448, -0.259019  
 C, -1.062543, 0.816119, -1.714846  
 C, -1.468903, 5.383235, 4.020816  
 C, -0.735260, 2.166604, -1.231746  
 C, 4.918261, 4.275355, 1.939077  
 C, 7.436380, 8.389331, 3.777780  
 H, 8.177575, 9.137080, 4.040941  
 C, -0.171343, -0.235758, -1.769253  
 C, 0.545392, 2.782277, -0.971343  
 H, 1.527998, 2.367173, -1.138804  
 C, 5.402202, 7.771082, 2.672842  
 C, 4.491971, 5.401142, 2.720299  
 C, 6.335401, 8.748081, 3.000122  
 H, 6.192201, 9.759501, 2.637235  
 C, 1.358023, 6.407512, 4.266554  
 H, 0.708616, 6.961310, 4.927877  
 C, 6.271189, 4.128356, 1.346405  
 C, 6.626993, 6.136373, 3.869542  
 C, 7.590775, 7.074755, 4.218679  
 H, 8.433004, 6.766670, 4.827599  
 C, -1.692017, 1.490508, 2.002182  
 H, -2.481115, 0.861310, 1.614565  
 C, 4.266077, 3.112890, 1.547752  
 C, 1.809254, -1.396233, -1.632145  
 C, -2.331251, 4.736736, 4.927657  
 H, -2.138952, 3.702916, 5.197696  
 C, 3.169579, -1.619903, -1.458088  
 C, 5.196113, 2.352562, 0.773331  
 C, 5.500426, 6.435431, 3.088938  
 C, -3.409767, 5.411568, 5.494871  
 H, -4.053923, 4.896125, 6.201676  
 C, -1.840295, 2.834129, 2.446618  
 H, -2.763692, 3.393839, 2.472123  
 C, -3.237700, -0.456205, -1.657771  
 H, -2.820308, -1.084680, -0.876616  
 C, -3.659601, 6.746583, 5.164882  
 H, -4.503062, 7.270110, 5.605367  
 C, -2.454371, 0.583456, -2.190848  
 C, -3.025211, 1.400668, -3.184624  
 H, -2.435387, 2.205880, -3.612352  
 C, -4.324718, 1.177669, -3.635338  
 H, -4.740557, 1.813727, -4.411673  
 C, -4.539685, -0.678589, -2.108953  
 H, -5.126897, -1.485402, -1.679414  
 C, -5.088216, 0.136851, -3.099589  
 H, -6.101719, -0.034388, -3.450332  
 C, 3.757257, -2.873983, -2.014021  
 C, 4.900619, -5.250886, -3.028357  
 H, 5.342001, -6.162894, -3.417829  
 C, 4.186635, -5.284680, -1.830788  
 H, 4.055030, -6.198918, -1.263332  
 F, 2.945762, -4.134334, -0.193376  
 C, 3.637336, -4.099927, -1.352638  
 C, 5.049626, -4.055041, -3.731356  
 H, 5.596232, -4.001976, -4.665968



C, 4.476073, -2.898893, -3.214676  
F, 4.600378, -1.755632, -3.908901  
H, 3.276369, 2.766890, 1.795432  
N, 1.134294, -0.240527, -1.285234  
C, -0.339606, -1.539133, -2.391702  
C, 0.832797, -2.224814, -2.306996  
H, -1.248690, -1.864474, -2.874586  
H, 1.044171, -3.209498, -2.697522  
H, 1.607617, 0.561467, -0.910157  
C, 4.966491, 1.157615, 0.111693  
C, 5.949765, 0.385043, -0.665777  
N, 5.433095, -0.677317, -1.203972  
C, 4.041674, -0.653801, -0.862614  
C, 3.755700, 0.425164, -0.028802  
H, 2.062401, 4.202826, 2.045413  
H, 2.837035, 0.635511, 0.499404  
H, 6.994112, 0.652970, -0.780109  
H, 7.065338, 4.864007, 1.424552

### 7c

Energy = -2819.916055, NImag = 0.0

Fe, -0.152975, 2.453861, -0.145605  
F, -5.393634, -1.899205, 2.343623  
F, -4.409901, -5.071204, -1.021428  
N, -3.268806, -0.191756, -0.623320  
N, -0.511184, -4.068869, 0.266572  
C, -1.844630, 2.386621, -1.437291  
C, -4.792187, 3.865837, 0.109667  
H, -4.720593, 3.246068, 0.998534  
C, 0.597093, 3.615214, 1.398607  
H, 0.843241, 4.661967, 1.296108  
C, -5.471121, -0.517026, -0.250038  
H, -6.408698, -1.022473, -0.070973  
C, -3.878680, 1.054243, -0.755184  
C, -0.676804, 3.090263, 1.754441  
H, -1.569338, 3.669024, 1.947718  
C, -3.259937, 2.246740, -1.069898  
C, -5.570293, 5.024740, 0.129316  
H, -6.106266, 5.297100, 1.034250  
C, -4.183584, -1.178792, -0.274286  
C, -0.875861, 1.376677, -1.792989  
H, -1.037609, 0.312918, -1.853601  
C, 0.357611, 2.011564, -2.118419  
H, 1.263591, 1.503957, -2.416639  
C, -0.583168, 1.667868, 1.736068  
H, -1.385674, 0.972046, 1.940172  
C, 2.962351, 2.675537, 0.958921  
C, -4.083327, 3.489025, -1.044945  
C, 1.517293, 2.524745, 1.189196  
C, -2.515537, -2.993333, -0.259634  
C, -6.694810, -5.225804, 1.776682  
H, -7.401914, -5.916833, 2.223972  
C, 3.775695, 1.659021, 0.497408  
C, 0.749437, 1.315717, 1.377975  
H, 1.121418, 0.302777, 1.330533  
C, -5.586681, -3.099814, 1.757326  
C, -3.855585, -2.500576, -0.010579  
C, -6.500261, -3.966533, 2.344245  
H, -7.027697, -3.650232, 3.236996  
C, -5.294227, 0.799242, -0.541990  
H, -6.063580, 1.550382, -0.641150  
C, -1.768312, -3.956719, 0.584580

C, -5.083441, -4.698299, 0.083866  
C, -5.980846, -5.601440, 0.638590  
H, -6.109611, -6.571220, 0.171684  
C, 0.189204, 3.416443, -1.954394  
H, 0.951626, 4.171353, -2.087466  
C, -1.595813, -2.595965, -1.202290  
C, 4.398557, -0.457546, -0.171147  
C, -4.172189, 4.320014, -2.177438  
H, -3.635755, 4.044247, -3.080459  
C, 4.221052, -1.759630, -0.601408  
C, -0.339425, -3.212183, -0.841532  
C, -4.847396, -3.412353, 0.602993  
C, -4.949132, 5.476647, -2.157818  
H, -5.011688, 6.097128, -3.047429  
C, -1.144883, 3.647335, -1.518976  
H, -1.569462, 4.608880, -1.271868  
C, 4.470921, 4.625614, 0.462610  
H, 4.654369, 4.196701, -0.517986  
C, -5.651953, 5.834531, -1.003998  
H, -6.255395, 6.737464, -0.989360  
C, 3.596443, 3.963293, 1.344547  
C, 3.349271, 4.555919, 2.598226  
H, 2.684576, 4.059088, 3.298073  
C, 3.961474, 5.754641, 2.957117  
H, 3.764463, 6.186274, 3.934483  
C, 5.084404, 5.825859, 0.823218  
H, 5.751620, 6.320101, 0.122534  
C, 4.832542, 6.395812, 2.071832  
H, 5.306681, 7.331801, 2.352467  
C, 5.225138, -2.818510, -0.423092  
C, 7.093397, -4.941353, -0.133484  
H, 7.806836, -5.751337, -0.021754  
C, 6.375304, -4.805530, -1.322300  
H, 6.506614, -5.485679, -2.156015  
F, 4.795154, -3.630918, -2.599143  
C, 5.469545, -3.761479, -1.438713  
C, 6.893579, -4.041699, 0.913160  
H, 7.422762, -4.128668, 1.855307  
C, 5.970949, -3.015781, 0.752363  
F, 5.777749, -2.177672, 1.792620  
H, -1.760531, -1.924746, -2.031797  
N, 3.352585, 0.448885, -0.036491  
C, 5.219455, 1.522623, 0.624628  
C, 5.579939, 0.262386, 0.264517  
H, 5.866427, 2.298162, 1.006710  
H, 6.573401, -0.160145, 0.282865  
H, 2.394291, 0.234739, -0.260161  
C, 1.037241, -1.801657, -2.394811  
C, 0.887192, -2.805365, -1.332795  
N, 2.093179, -3.004598, -0.670814  
C, 2.907910, -2.086301, -1.160589  
C, 2.296364, -1.323437, -2.267562  
H, -2.278817, -0.317709, -0.478740  
H, 2.802821, -0.579913, -2.869835  
H, -2.191655, -4.504855, 1.422252  
H, 0.284809, -1.516507, -3.117397

### 7d

Energy = -2819.881366, NImag = 0.0

Fe, -1.691873, 3.480599, 0.298803  
F, 6.230923, 5.080186, 0.783969  
F, 3.679331, 1.763148, 2.975491

N, 1.310304, 4.456802, 2.061433  
N, 3.759873, 4.653816, -2.302820  
C, -1.554615, 3.933325, 2.421593  
C, -0.992576, 7.099423, 4.391198  
H, -0.080451, 7.420319, 3.898735  
C, -2.228257, 3.230368, -1.663919  
H, -3.082471, 2.651720, -1.980840  
C, 2.822826, 4.828496, 3.662374  
H, 3.772764, 4.900527, 4.172533  
C, 0.603502, 4.901570, 3.152322  
C, -2.233523, 4.617105, -1.351094  
H, -3.097498, 5.266904, -1.365039  
C, -0.813627, 4.904392, 3.194133  
C, -1.646545, 7.964809, 5.263429  
H, -1.227248, 8.948260, 5.456713  
C, 2.661603, 4.404527, 2.315457  
C, -1.134995, 2.581229, 2.102311  
H, -0.174206, 2.152382, 2.349885  
C, -2.230201, 1.888379, 1.526348  
H, -2.226371, 0.856806, 1.204546  
C, -0.914231, 4.980628, -0.958921  
H, -0.589702, 5.959159, -0.632642  
C, -0.499420, 1.342884, -1.718494  
C, -1.513437, 5.816405, 4.105731  
C, -0.872553, 2.717611, -1.531127  
C, 2.629992, 5.508199, -0.491766  
C, 7.248306, 2.331699, 2.900303  
H, 8.158923, 1.899194, 3.302027  
C, 0.750307, 0.741185, -1.472865  
C, -0.093769, 3.821902, -1.025286  
H, 0.965987, 3.835833, -0.834841  
C, 6.148806, 3.984172, 1.556978  
C, 3.626270, 4.055906, 1.325683  
C, 7.322728, 3.453743, 2.074186  
H, 8.267539, 3.922307, 1.824771  
C, 1.579752, 5.183629, 4.157491  
H, 1.352222, 5.549649, 5.147889  
C, 2.901930, 5.628894, -1.834014  
C, 4.866179, 2.328067, 2.680082  
C, 6.015634, 1.757745, 3.209049  
H, 5.928191, 0.874647, 3.830212  
C, -3.313997, 2.806047, 1.377866  
H, -4.270452, 2.592182, 0.921205  
C, 3.408854, 4.384813, -0.028158  
C, 2.940437, 0.343049, -0.927653  
C, -2.725496, 5.449124, 4.734033  
H, -3.136084, 4.460803, 4.556940  
C, 4.354904, 0.445917, -0.722254  
C, 4.076315, 3.894486, -1.253756  
C, 4.879087, 3.447079, 1.831140  
C, -3.378654, 6.319890, 5.600829  
H, -4.303335, 6.006843, 6.077698  
C, -2.892729, 4.065609, 1.891308  
H, -3.480509, 4.972327, 1.915467  
C, -2.158353, -0.566767, -1.467066  
H, -1.804277, -0.722473, -0.452530  
C, -2.844382, 7.582520, 5.872900  
H, -3.355854, 8.260055, 6.550143  
C, -1.578581, 0.445121, -2.249543  
C, -2.046892, 0.621472, -3.562454  
H, -1.603862, 1.394627, -4.183371  
C, -3.061424, -0.187468, -4.075221  
H, -3.403236, -0.038110, -5.095429

C, -3.173761, -1.376128, -1.979104  
H, -3.609141, -2.151634, -1.355213  
C, -3.629849, -1.188490, -3.285017  
H, -4.419524, -1.818242, -3.684137  
C, 4.985167, -0.882234, -0.389288  
C, 6.140928, -3.372126, 0.278525  
H, 6.586717, -4.328241, 0.534106  
C, 5.519660, -2.610860, 1.267338  
H, 5.463060, -2.939935, 2.298727  
F, 4.349296, -0.658514, 1.870850  
C, 4.956548, -1.390185, 0.909640  
C, 6.190624, -2.914210, -1.039067  
H, 6.665867, -3.485087, -1.828613  
C, 5.616276, -1.686051, -1.343242  
F, 5.645192, -1.262320, -2.617810  
N, 1.971564, 1.316453, -1.098205  
C, 0.992709, -0.667684, -1.522428  
C, 2.291163, -0.905194, -1.153214  
H, 0.259065, -1.405298, -1.804231  
H, 2.776030, -1.865788, -1.089827  
H, 2.192222, 2.303555, -1.115447  
C, 5.134634, 2.901697, -1.357895  
C, 5.264995, 1.486713, -0.921649  
N, 6.601297, 1.095782, -1.031860  
C, 7.225972, 2.101028, -1.610467  
C, 6.373979, 3.224314, -1.865113  
H, 2.525933, 6.384725, -2.515158  
H, 0.872103, 4.163974, 1.198661  
H, 8.289763, 2.042340, -1.825546  
H, 2.052436, 6.182540, 0.125070  
H, 6.654376, 4.187164, -2.268976

## 7e

Energy = -2819.882653, NImag =0.0

Fe, -1.603476, 3.445073, 0.306669  
F, 6.295395, 5.090088, 0.937130  
F, 3.704550, 1.756764, 3.051629  
N, 1.357919, 4.480254, 2.123036  
C, 3.595556, 4.586649, -2.155069  
C, -1.515349, 3.943009, 2.430706  
C, -0.999746, 7.197919, 4.258514  
H, -0.062725, 7.482627, 3.791318  
C, -2.123913, 3.219529, -1.663653  
H, -2.993194, 2.675934, -2.001429  
C, 2.831704, 4.903586, 3.746184  
H, 3.768386, 5.002151, 4.276263  
C, 0.623544, 4.939525, 3.185400  
C, -2.079505, 4.604206, -1.345388  
H, -2.916215, 5.288372, -1.370826  
C, -0.803834, 4.943599, 3.180312  
C, -1.677995, 8.114183, 5.056670  
H, -1.253722, 9.101382, 5.217233  
C, 2.705309, 4.449347, 2.410712  
C, -1.069450, 2.589885, 2.141963  
H, -0.110759, 2.177248, 2.422770  
C, -2.143734, 1.870288, 1.561916  
H, -2.119661, 0.830475, 1.268348  
C, -0.750852, 4.918279, -0.939879  
H, -0.392558, 5.884940, -0.614933  
C, -0.457781, 1.279487, -1.714103  
C, -1.526201, 5.907957, 4.014958  
C, -0.787013, 2.657605, -1.526463

C, 2.674108, 5.460081, -0.412083  
C, 7.278295, 2.299985, 3.016456  
H, 8.182504, 1.852078, 3.415825  
C, 0.785049, 0.650241, -1.459932  
C, 0.022942, 3.729579, -0.994283  
H, 1.073271, 3.681159, -0.765643  
C, 6.202080, 3.984783, 1.696227  
C, 3.687096, 4.080302, 1.440127  
C, 7.368554, 3.436658, 2.212270  
H, 8.319309, 3.900482, 1.977031  
C, 1.567844, 5.249895, 4.206459  
H, 1.312070, 5.632691, 5.183606  
N, 2.765755, 5.612288, -1.715112  
C, 4.897527, 2.319612, 2.781422  
C, 6.039262, 1.728946, 3.305000  
H, 5.941573, 0.832416, 3.904917  
C, -3.235273, 2.770164, 1.365296  
H, -4.179205, 2.532173, 0.894847  
C, 3.469079, 4.342252, 0.080584  
C, 2.973660, 0.236790, -0.939567  
C, -2.766920, 5.586388, 4.613098  
H, -3.181035, 4.593664, 4.472950  
C, 4.393548, 0.336999, -0.763973  
C, 4.074760, 3.789270, -1.132460  
C, 4.927675, 3.456938, 1.958673  
C, -3.443499, 6.507782, 5.406171  
H, -4.390011, 6.229136, 5.861091  
C, -2.841064, 4.046931, 1.857572  
H, -3.440800, 4.945905, 1.847676  
C, -2.181614, -0.572417, -1.452640  
H, -1.853559, -0.717311, -0.427928  
C, -2.905067, 7.777374, 5.634381  
H, -3.434562, 8.494317, 6.254805  
C, -1.555963, 0.404859, -2.243650  
C, -1.996672, 0.570484, -3.567458  
H, -1.519599, 1.318135, -4.194391  
C, -3.028155, -0.215288, -4.082680  
H, -3.349050, -0.073396, -5.110743  
C, -3.212699, -1.359855, -1.967571  
H, -3.683396, -2.108717, -1.336760  
C, -3.640523, -1.183353, -3.284524  
H, -4.442922, -1.795610, -3.685506  
C, 5.028385, -0.987523, -0.428088  
C, 6.197154, -3.465510, 0.250987  
H, 6.647321, -4.418357, 0.510959  
C, 5.628804, -2.673173, 1.247770  
H, 5.618936, -2.975171, 2.288903  
F, 4.504447, -0.691974, 1.852137  
C, 5.059497, -1.457249, 0.884894  
C, 6.189887, -3.042664, -1.079126  
H, 6.626381, -3.637022, -1.873707  
C, 5.610168, -1.818222, -1.388358  
F, 5.591716, -1.419147, -2.671944  
N, 2.024252, 1.221239, -1.161278  
C, 0.987527, -0.760184, -1.411746  
C, 2.294117, -1.004602, -1.058224  
H, 0.224754, -1.496850, -1.605240  
H, 2.754512, -1.970596, -0.927428  
H, 2.276924, 2.194416, -1.293846  
C, 5.174069, 2.823332, -1.249397  
C, 5.295332, 1.382542, -0.943523  
N, 6.647185, 0.999176, -1.040679  
C, 7.292575, 2.055890, -1.466353

C, 6.439522, 3.208345, -1.620154  
H, 0.944506, 4.155253, 1.259419  
H, 8.362890, 2.020873, -1.652418  
H, 3.823499, 4.484077, -3.209872  
H, 2.137315, 6.169538, 0.208701  
H, 6.741013, 4.212996, -1.886493

## 7f

Energy = -2819.876750 NImag=0.0

Fe, -1.577696, 3.427654, 0.332153  
F, 6.309518, 5.106226, 0.976023  
F, 3.720967, 1.793199, 3.124333  
N, 1.371009, 4.489221, 2.159214  
C, 3.581102, 4.547076, -2.101552  
C, -1.503123, 3.931614, 2.453190  
C, -1.028489, 7.228420, 4.207026  
H, -0.089914, 7.508231, 3.740166  
C, -2.111882, 3.209044, -1.636217  
H, -2.987646, 2.674132, -1.971314  
C, 2.827621, 4.965856, 3.781851  
H, 3.759348, 5.089428, 4.315354  
C, 0.623032, 4.958519, 3.208140  
C, -2.054662, 4.592345, -1.311725  
H, -2.885403, 5.283992, -1.329533  
C, -0.807222, 4.948807, 3.189018  
C, -1.721006, 8.159490, 4.975111  
H, -1.306962, 9.154428, 5.112468  
C, 2.715022, 4.485226, 2.457517  
C, -1.034696, 2.582942, 2.170802  
H, -0.071822, 2.185721, 2.459195  
C, -2.095945, 1.844941, 1.592765  
H, -2.054508, 0.804025, 1.304829  
C, -0.720143, 4.893708, -0.916600  
H, -0.351088, 5.856406, -0.592171  
C, -0.461366, 1.260612, -1.727034  
C, -1.542983, 5.928415, 3.993618  
C, -0.778141, 2.636296, -1.517979  
C, 2.679615, 5.464648, -0.370089  
C, 7.297265, 2.324080, 3.061148  
H, 8.202895, 1.875153, 3.456315  
C, 0.780039, 0.618681, -1.485176  
C, 0.043155, 3.698108, -0.980962  
H, 1.094274, 3.636851, -0.759099  
C, 6.218550, 4.003972, 1.738589  
C, 3.706033, 4.106854, 1.491757  
C, 7.387095, 3.452365, 2.245706  
H, 8.338366, 3.903905, 1.990665  
C, 1.552799, 5.299070, 4.229151  
H, 1.284582, 5.694343, 5.197977  
N, 2.756635, 5.591578, -1.671938  
C, 4.914618, 2.352259, 2.845249  
C, 6.057544, 1.762461, 3.366986  
H, 5.960950, 0.873330, 3.978154  
C, -3.200714, 2.727590, 1.387350  
H, -4.138987, 2.472324, 0.914720  
C, 3.490899, 4.356861, 0.136116  
C, 2.970049, 0.184356, -0.985322  
C, -2.784532, 5.610561, 4.591907  
H, -3.187873, 4.610400, 4.475615  
C, 4.387173, 0.288184, -0.809099  
C, 4.084320, 3.780130, -1.071918  
C, 4.944027, 3.482959, 2.014290

|                                    |   |           |           |           |
|------------------------------------|---|-----------|-----------|-----------|
| C, -3.474386, 6.546141, 5.356321   | 6 | -1.669046 | 8.106864  | 5.022229  |
| H, -4.420968, 6.270994, 5.813068   | 1 | -1.246774 | 9.097155  | 5.167950  |
| C, -2.829518, 4.012198, 1.875265   | 6 | 2.716187  | 4.422350  | 2.425007  |
| H, -3.443491, 4.901310, 1.859092   | 6 | -1.071313 | 2.562343  | 2.140141  |
| C, -2.211632, -0.567252, -1.467796 | 1 | -0.114498 | 2.144109  | 2.418850  |
| H, -1.889602, -0.713686, -0.441322 | 6 | -2.148248 | 1.850640  | 1.556352  |
| C, -2.948857, 7.826325, 5.553378   | 1 | -2.127679 | 0.812688  | 1.256046  |
| H, -3.488856, 8.554488, 6.151253   | 6 | -0.747148 | 4.913466  | -0.921437 |
| C, -1.569225, 0.399234, -2.258750  | 1 | -0.387146 | 5.876300  | -0.587027 |
| C, -2.003683, 0.567439, -3.584272  | 6 | -0.460201 | 1.282446  | -1.732006 |
| H, -1.514224, 1.307134, -4.211161  | 6 | -1.516384 | 5.887621  | 4.010170  |
| C, -3.044926, -0.204498, -4.101018 | 6 | -0.787348 | 2.658490  | -1.530935 |
| H, -3.361113, -0.059931, -5.130201 | 6 | 2.679784  | 5.414721  | -0.401205 |
| C, -3.251569, -1.342062, -1.984289 | 6 | 7.342570  | 2.389121  | 3.036631  |
| H, -3.734593, -2.083055, -1.353406 | 1 | 8.261024  | 1.976265  | 3.441766  |
| C, -3.672966, -1.162489, -3.302912 | 6 | 0.778610  | 0.647234  | -1.470115 |
| H, -4.482566, -1.764437, -3.705102 | 6 | 0.023747  | 3.722780  | -0.986553 |
| C, 5.014542, -1.045820, -0.485687  | 1 | 1.073943  | 3.668385  | -0.760012 |
| C, 6.188154, -3.530952, 0.162526   | 6 | 6.212959  | 4.020469  | 1.691561  |
| H, 6.641930, -4.484866, 0.411512   | 6 | 3.699623  | 4.048202  | 1.453368  |
| C, 5.742266, -2.689721, 1.182154   | 6 | 7.397118  | 3.510740  | 2.209306  |
| H, 5.830515, -2.957574, 2.228840   | 1 | 8.332469  | 3.997068  | 1.958735  |
| F, 4.726259, -0.664549, 1.823314   | 6 | 1.573178  | 5.239791  | 4.208273  |
| C, 5.166898, -1.471886, 0.836177   | 1 | 1.315386  | 5.637114  | 5.179043  |
| C, 6.055262, -3.156382, -1.175019  | 7 | 2.793027  | 5.576892  | -1.699029 |
| H, 6.393863, -3.789980, -1.986745  | 6 | 4.961078  | 2.336753  | 2.815573  |
| C, 5.471543, -1.928565, -1.468009  | 6 | 6.121310  | 1.789329  | 3.345114  |
| F, 5.339266, -1.567279, -2.757725  | 1 | 6.052007  | 0.906168  | 3.968589  |
| N, 2.026323, 1.178203, -1.206762   | 6 | -3.236982 | 2.755604  | 1.366081  |
| C, 0.967574, -0.793188, -1.430354  | 1 | -4.181536 | 2.523739  | 0.893868  |
| C, 2.276125, -1.049262, -1.090182  | 6 | 3.474193  | 4.293808  | 0.095402  |
| H, 0.193122, -1.522285, -1.605312  | 6 | 2.961170  | 0.218962  | -0.928602 |
| H, 2.721497, -2.021174, -0.949687  | 6 | -2.754262 | 5.570843  | 4.616214  |
| H, 2.284855, 2.148887, -1.343088   | 1 | -3.166481 | 4.575491  | 4.489790  |
| C, 5.172862, 2.795288, -1.184195   | 6 | 4.378928  | 0.308749  | -0.739446 |
| C, 5.275301, 1.352512, -0.937263   | 6 | 4.092183  | 3.748656  | -1.114082 |
| C, 6.721368, 1.097712, -1.074440   | 6 | 4.955823  | 3.456860  | 1.970345  |
| N, 7.400279, 2.157112, -1.416066   | 6 | -3.429833 | 6.500988  | 5.399925  |
| C, 6.456257, 3.189232, -1.473648   | 1 | -4.374001 | 6.226543  | 5.862098  |
| H, 0.970159, 4.145834, 1.296353    | 6 | -2.839329 | 4.027510  | 1.866655  |
| H, 3.790200, 4.421308, -3.157703   | 1 | -3.436262 | 4.928333  | 1.862753  |
| H, 2.153376, 6.187079, 0.245335    | 6 | -2.204536 | -0.555519 | -1.496685 |
| H, 7.199503, 0.131450, -0.966356   | 1 | -1.893736 | -0.703642 | -0.467042 |
| H, 6.773283, 4.203165, -1.686554   | 6 | -2.893162 | 7.774614  | 5.608789  |

## 7g

Energy = -2819.873341 NImag=0.0

|    |           |          |           |   |           |           |           |
|----|-----------|----------|-----------|---|-----------|-----------|-----------|
| 26 | -1.602708 | 3.435488 | 0.312834  | 1 | -1.484967 | 1.330708  | -4.226311 |
| 9  | 6.267597  | 5.119316 | 0.928815  | 6 | -3.009103 | -0.188879 | -4.138314 |
| 9  | 3.784071  | 1.748304 | 3.104601  | 1 | -3.313981 | -0.042790 | -5.170677 |
| 7  | 1.369213  | 4.430563 | 2.139370  | 6 | -3.234827 | -1.333589 | -2.027418 |
| 6  | 3.634166  | 4.555598 | -2.135109 | 1 | -3.721637 | -2.078571 | -1.404214 |
| 6  | -1.512599 | 3.915774 | 2.437594  | 6 | -3.641734 | -1.152214 | -3.350305 |
| 6  | -0.991085 | 7.181271 | 4.234620  | 1 | -4.443755 | -1.756790 | -3.763567 |
| 1  | -0.056025 | 7.461239 | 3.760816  | 6 | 4.984061  | -1.031233 | -0.398940 |
| 6  | -2.122994 | 3.223975 | -1.660769 | 6 | 6.136414  | -3.521431 | 0.272281  |
| 1  | -2.993310 | 2.685035 | -2.003553 | 1 | 6.580714  | -4.477479 | 0.530087  |
| 6  | 2.841063  | 4.899986 | 3.750946  | 6 | 5.673737  | -2.678144 | 1.282374  |
| 1  | 3.777706  | 5.018358 | 4.276852  | 1 | 5.739471  | -2.945954 | 2.330753  |
| 6  | 0.631729  | 4.905821 | 3.193721  | 9 | 4.652858  | -0.650068 | 1.904030  |
| 6  | -2.076167 | 4.606156 | -1.330129 | 6 | 5.109187  | -1.458194 | 0.925104  |
| 1  | -2.911403 | 5.292321 | -1.350004 | 6 | 6.030495  | -3.146191 | -1.067693 |
| 6  | -0.796115 | 4.912802 | 3.184921  | 1 | 6.379717  | -3.782234 | -1.873045 |

|   |          |           |           |
|---|----------|-----------|-----------|
| 6 | 5.457901 | -1.916044 | -1.371977 |
| 9 | 5.349488 | -1.556578 | -2.664368 |
| 7 | 2.019977 | 1.210089  | -1.168573 |
| 6 | 0.967769 | -0.764414 | -1.406688 |
| 6 | 2.268340 | -1.016784 | -1.038957 |
| 1 | 0.198911 | -1.495941 | -1.595466 |
| 1 | 2.711616 | -1.987823 | -0.888060 |
| 1 | 2.284853 | 2.178458  | -1.313739 |
| 6 | 5.204427 | 2.793225  | -1.226670 |
| 6 | 5.303215 | 1.339437  | -0.902826 |
| 6 | 6.728140 | 1.071388  | -1.032278 |
| 6 | 7.296623 | 2.221645  | -1.481665 |
| 7 | 6.377308 | 3.269934  | -1.589487 |
| 1 | 0.959007 | 4.094331  | 1.278276  |
| 1 | 8.335162 | 2.396488  | -1.737842 |
| 1 | 3.892761 | 4.472114  | -3.183636 |
| 1 | 2.132128 | 6.117754  | 0.217306  |
| 1 | 7.215785 | 0.121685  | -0.874938 |
